# Supplementary material for: pH-Controlled forms of 1-amino-1-hydrazino-2,2-dinitroethylene (HFOX): selective reactivity of amine and hydrazinyl groups with aldehydes or ketones
Source: Royal Society of Chemistry journal article supplement (doi:10.1039/d2ma00307d), 2022-01-01
Supplement: d2ma00307d1.pdf [file d2ma00307d1.pdf]

## Electronic Supplementary Information

### **pH-Controlled forms of 1-amino-1-hydrazino-2,2-dinitroethylene (HFOX): Selective reactivity of amine and hydrazinyl groups with aldehydes or ketones**

Ajay Kumar Chinnam,<sup>a</sup> Richard J. Staples,<sup>b</sup> Jean'ne M. Shreeve\*<sup>a</sup>

<sup>a</sup> Department of Chemistry, University of Idaho, Moscow, ID 83844-2343 USA, E-mail: jshreeve@uidaho.edu

<sup>b</sup> Department of Chemistry, Michigan State University, East Lansing, Michigan 48824, USA

#### **Table of Contents**

|                                       |            |
|---------------------------------------|------------|
| <b>1. Experimental section</b>        | <b>S2</b>  |
| <b>2. Theoretical calculations</b>    | <b>S6</b>  |
| <b>3. X-ray Crystallographic Data</b> | <b>S8</b>  |
| <b>4. NMR Spectra</b>                 | <b>S55</b> |
| <b>5. References</b>                  | <b>S70</b> |

## 1. Experimental Section

**Caution!** 1-Amino-1-hydrazino-2,2-dinitroethylene is highly sensitive<sup>1</sup> and other new materials can potentially explode under certain conditions (e.g., impact, friction, or electric discharge). Although no explosions or detonations occurred during the preparation and manipulation of these materials, all reactions should be carried out on a small scale with appropriate safety precautions, such as the use of extra shields in a fume hood and personal protection equipment (safety glasses, face shields, ear plugs, as well as gloves) are strongly encouraged.

### General Information

Reagents were purchased from Aldrich and Acros Organics and were used as received. <sup>1</sup>H, <sup>13</sup>C and <sup>19</sup>F NMR spectra were recorded on a 300 MHz (Bruker AVANCE 300) nuclear magnetic resonance spectrometer operating at 300.13, 75.48 and 282.40 MHz, respectively, by using DMSO-d<sub>6</sub> or acetone-d<sub>6</sub> or chloroform-d or acetonitrile-d<sub>3</sub> as the solvent and locking solvent. Tetramethyl silane, is used as a reference for <sup>1</sup>H, and <sup>13</sup>C, respectively. IR spectra were recorded using KBr pellets for solids on a Nicolet Thermo-model AVATAR 370-spectrometer. The melting and decomposition (onset) points were obtained on a differential scanning calorimeter (TA Instruments Co., model Q2000) at a scan rate of 5 °C min<sup>-1</sup>. Density was measured at room temperature by employing a Micromeritics AccuPyc II 1340 gas pycnometer. Elemental analyses (C, H, N) were determined using a Vario Micro-cube Elementar Analyser. The sensitivities to impact (IS) and friction (FS) were determined according to BAM standards. Crystallographic data for the reported structures in this manuscript have been deposited with the Cambridge Crystallographic Data Centre. CCDC 1975378 (**11**), 1975379 (**9**), 2154055 (**5, form i**), 2154056 (**5, form ii**), 2154057 (**5c**), 2154058 (**5e**), and 2154059 (**12a**), contain the supplementary crystallographic data for this paper. These data can be obtained free of charge from The Cambridge Crystallographic Data Centre.

**3-(2-(1-Amino-2,2-dinitrovinyl)hydrazono)butan-2-one (3):** A mixture of HFOX (0.2 g, 1.23 mmol) and 2,3-butanedione (0.1g, 1.23 mmol) was stirred in distilled water (10.0 mL) and pH~2 adjusted using concentrated HCl. The resulting mixture was stirred at room temperature for 4 hours. A yellow precipitate formed and was collected by filtration. The solid was washed with excess water (15.0 mL) and dried at room temperature to give a yellow product **3** (0.26 g, 92%). T<sub>d</sub> (onset): 165 °C; <sup>1</sup>H NMR (DMSO-d<sub>6</sub>, ppm): 12.42 (b, s, 1H, NH), 10.44 (s, 1H, NH), 9.86 (s, 1H, NH), 2.50 (s, 3H, CH<sub>3</sub>), 2.04 (s, 3H, CH<sub>3</sub>); <sup>13</sup>C NMR (DMSO-d<sub>6</sub>, ppm): 197.3, 157.2, 155.9, 125.7, 25.2, 11.6. IR (KBr pellet): ν 3421, 3310, 1696, 1618, 1558, 1492, 1426, 1360, 1303, 1216, 1139, 1076, 867, 800, 787, 749, 605, 541, 486, 486 cm<sup>-1</sup>; Elemental analysis (%) calcd for C<sub>6</sub>H<sub>9</sub>N<sub>5</sub>O<sub>5</sub> (231.06): C, 31.37; H, 3.92; N, 30.30; found: C, 31.43; H, 4.34; N, 30.30.

**Potassium (5,6-dimethyl-1,2,4-triazin-3-yl)dinitromethanide (5):** HFOX (0.30 g, 1.84 mmol) and 2,3-butanedione (0.16 g, 1.84 mmol) were mixed in acetonitrile (10.0 mL). To this, potassium hydroxide (0.10 g, 1.84 mmol) dissolved in the minimum amount of water was added, and the resulting mixture was stirred at room temperature for 6 hours. An orange precipitate formed and

was collected by filtration and dried at room temperature to give an orange solid **5** (0.39 g, 85%)  $T_d$  (onset): 236 °C;  $^1\text{H}$  NMR (DMSO- $d_6$ ): 2.65 (s, 3H,  $\text{CH}_3$ ), 2.53 (s, 3H,  $\text{CH}_3$ ) ppm;  $^{13}\text{C}$  NMR (DMSO- $d_6$ ): 159.8, 159.6, 155.9, 132.4, 21.4, 19.1 ppm. IR (KBr pellet):  $\nu$  3431, 1702, 1497, 1361, 1246, 1137, 984, 932, 820, 753, 653, 519  $\text{cm}^{-1}$ ; Elemental analysis (%) calcd for  $\text{C}_6\text{H}_7\text{N}_5\text{KO}_{4.5}$  (251.01): C, 27.69; H, 2.71; N, 26.91; found: C, 27.14; H, 2.88; N, 27.07.

**Sodium (5,6-dimethyl-1,2,4-triazin-3-yl)dinitromethanide (5a)**: HFOX (0.30 g, 1.84 mmol) and 2,3-butanedione (0.16 g, 1.84 mmol) were mixed in acetonitrile (10.0 mL). To this, sodium hydroxide (74 mg, 1.84 mmol) dissolved in the minimum amount of water was added, and the resulting mixture was stirred at room temperature for 6 hours. An orange precipitate formed and was collected by filtration and dried at room temperature to give an orange solid **5a** (0.38 g, 88%)  $T_d$  (onset): 260 °C;  $^1\text{H}$  NMR (DMSO- $d_6$ ): 2.63 (s, 3H,  $\text{CH}_3$ ), 2.51 (s, 3H,  $\text{CH}_3$ ) ppm;  $^{13}\text{C}$  NMR (DMSO- $d_6$ ): 159.9, 159.5, 155.9, 132.4, 21.4, 19.2 ppm. IR (KBr pellet):  $\nu$  3454, 2515, 1495, 1442, 1371, 1241, 1124, 1045, 983, 937, 830, 754, 652, 552  $\text{cm}^{-1}$ ; Elemental analysis (%) calcd for  $\text{C}_6\text{H}_6\text{N}_5\text{NaO}_4$  (235.03): C, 30.52; H, 2.99; N, 29.66; found: C, 30.17; H, 3.12; N, 29.28.

**Lithium (5,6-dimethyl-1,2,4-triazin-3-yl)dinitromethanide (5b)**: HFOX (0.2 g, 1.23 mmol) and 2,3-butanedione (0.1g, 1.23 mmol) were mixed in acetonitrile (10.0 mL). To this, lithium hydroxide (30 mg, 1.23 mmol) dissolved in the minimum amount of water was added, and the resulting mixture was stirred at room temperature for 6 hours. A yellow precipitate formed and was collected by filtration and dried at room temperature to give yellow solid **5b** (0.2 g, 76%).  $T_d$  (onset): 158 °C;  $^1\text{H}$  NMR (DMSO- $d_6$ ): 2.63 (s, 3H,  $\text{CH}_3$ ), 2.50 (s, 3H,  $\text{CH}_3$ ) ppm;  $^{13}\text{C}$  NMR (DMSO- $d_6$ ): 159.9, 156.8, 155.9, 132.3, 21.5, 19.2 ppm. IR (KBr pellet):  $\nu$  3463, 2339, 1636, 1508, 1392, 1343, 1256, 1135, 1034, 987, 930, 829, 755, 737, 589, 489  $\text{cm}^{-1}$ ; Elemental analysis (%) calcd for  $\text{C}_6\text{H}_8\text{N}_5\text{LiO}_5$  (237.06): C, 30.27; H, 3.81; N, 29.41; found: C, 30.52; H, 4.01; N, 29.75.

**Ammonium (5,6-dimethyl-1,2,4-triazin-3-yl)dinitromethanide (5c)**: HFOX (0.30 g, 1.84 mmol) and 2,3-butanedione (0.30 g, 1.84 mmol) were mixed in acetonitrile (10.0 mL). To this, aqueous ammonia (0.5 mL) was added dropwise, and the resulting mixture was stirred at room temperature for 6 hours. A yellow precipitate formed and was collected by filtration and dried at room temperature to give yellow solid **5c** (0.38 g, 90%).  $T_d$  (onset): 161 °C;  $^1\text{H}$  NMR (DMSO- $d_6$ ): 7.11 (b, 4H,  $\text{NH}_4$ ), 2.63 (s, 3H,  $\text{CH}_3$ ), 2.50 (s, 3H,  $\text{CH}_3$ ) ppm;  $^{13}\text{C}$  NMR (DMSO- $d_6$ ): 159.9, 159.6, 155.9, 132.4, 21.4, 19.1 ppm. IR (KBr pellet):  $\nu$  3176, 1690, 1482, 1349, 1238, 1142, 1043, 1006, 984, 934, 822, 799, 752, 654, 613, 553  $\text{cm}^{-1}$ ; Elemental analysis (%) calcd for  $\text{C}_6\text{H}_{10}\text{N}_6\text{O}_4$  (230.07): C, 31.31; H, 4.38; N, 36.51; found: C, 31.57; H, 4.59; N, 37.23.

**Sodium dinitro(1,2,4-triazin-3-yl)methanide (5e)**: HFOX (0.28 g, 1.72 mmol) and 40% glyoxal (0.20 g, 1.72 mmol) were mixed in acetonitrile (10.0 mL). To this, sodium hydroxide (70 mg, 1.72 mmol) dissolved in water (1.0 mL) was added, and the resulting mixture was stirred at room temperature for 6 hours. An orange precipitate formed and was collected by filtration and dried at room temperature to give an orange solid **5e** (0.30 g, 84%).  $T_d$  (onset): 301 °C;  $^1\text{H}$  NMR (DMSO-

d<sub>6</sub>): 9.29 (s, 1H, CH), 8.92 (s, 1H, CH) ppm; <sup>13</sup>C NMR (DMSO-d<sub>6</sub>): 162.0, 154.0, 148.0, 132.6 ppm. IR (KBr pellet): ν 3405, 3029, 1609, 1507, 1370, 1313, 1243, 1123, 1089, 1057, 887, 842, 751, 611, 461 cm<sup>-1</sup>; Elemental analysis (%) calcd for C<sub>4</sub>H<sub>2</sub>N<sub>5</sub>NaO<sub>4</sub> (207.00): C, 23.20; H, 0.97; N, 33.82; found: C, 22.61; H, 1.57; N, 34.18.

**Lithium dinitro(1,2,4-triazin-3-yl)methanide (5f):** HFOX (0.30 g, 1.84 mmol) and 40% glyoxal (0.25 g, 1.84 mmol) were mixed in acetonitrile (10.0 mL). To this, lithium hydroxide (44 mg, 1.84 mmol) dissolved in the minimum amount of water was added, and the resulting mixture was stirred at room temperature for 6 hours. An orange precipitate formed and was collected by filtration and dried at room temperature to give an orange solid **5f** (0.27 g, 77%). T<sub>d</sub> (onset): 200 °C; <sup>1</sup>H NMR (DMSO-d<sub>6</sub>): 9.29 (s, 1H, CH), 8.91 (s, 1H, CH) ppm; <sup>13</sup>C NMR (DMSO-d<sub>6</sub>): 162.0, 150.2, 147.8, 131.8 ppm. IR (KBr pellet): ν 3406, 3122, 1518, 1440, 1415, 1345, 1278, 1139, 1087, 1061, 987, 968, 885, 870, 844, 812, 748, 538, 481, 436 cm<sup>-1</sup>; Elemental analysis (%) calcd for C<sub>4</sub>H<sub>2</sub>N<sub>5</sub>LiO<sub>4</sub> (191.02): C, 25.15; H, 1.06; N, 36.66; found: C, 24.84; H, 1.73; N, 35.69.

**Potassium-1-(1-amino-2,2-dinitrovinyl)-2-(3-oxobutan-2-ylidene)hydrazin-1-ide (6):** To compound **3** (0.2 g, 0.93 mmol) in acetonitrile (10.0 mL) was added potassium hydride (52 mg, 0.93 mmol) in distilled water (1.0 mL). The resulting mixture was stirred at room temperature for 1 hour, and an orange precipitate formed and was collected by filtration and washed with acetonitrile (2.0 mL) and dried at room temperature to give an orange solid **6** (0.23 g, 98%). T<sub>d</sub> (onset): 142 °C; <sup>1</sup>H NMR (DMSO-d<sub>6</sub>, ppm): 8.06 (b, 2H, NH<sub>2</sub>), 2.38 (s, 3H, CH<sub>3</sub>), 1.89 (s, 3H, CH<sub>3</sub>); <sup>13</sup>C NMR (DMSO-d<sub>6</sub>, ppm): 198.8, 155.8, 130.0, 24.9, 10.8. IR (KBr pellet): ν 3599, 3429, 3307, 3194, 1676, 1607, 1545, 1510, 1418, 1361, 1291, 1226, 1120, 1029, 946, 854, 793, 751, 709, 658, 611, 523 cm<sup>-1</sup>; Elemental analysis (%) calcd for C<sub>6</sub>H<sub>8</sub>N<sub>5</sub>KO<sub>5</sub> (269.01): C, 26.76; H, 2.99; N, 26.01; found: C, 25.94; H, 3.21; N, 26.09.

**2,2-Dinitro-1-(2-((perfluorophenyl)methylene)hydrazineyl)ethen-1-amine (9):** HFOX (0.2 g, 1.23 mmol) and pentafluorobenzaldehyde (0.24 g, 1.23 mmol) were mixed in distilled water (10 mL). A few drops of concentrated HCl were added to maintain a pH~2, and the resulting mixture was stirred at room temperature for 4 hours. A yellow precipitate was formed and collected by filtration and dried at room temperature to give a yellow solid **9** (0.40 g, 96%). T<sub>d</sub> (onset): 160 °C; <sup>1</sup>H NMR (DMSO-d<sub>6</sub>): 13.36 (s, 1H, NH), 10.16 (s, 1H, NH<sub>2</sub>), 9.43 (s, 1H, NH<sub>2</sub>), 8.43 (s, 1H, CH) ppm; <sup>13</sup>C NMR (DMSO-d<sub>6</sub>): 154.3, 146.9, 143.5, 142.4, 140.4, 139.2, 125.7, 108.4 ppm. <sup>19</sup>F NMR (DMSO-d<sub>6</sub>): -139.69 (s, 1F), -141.95 (s, 1F), -149.99 (s, 1F), -162.19 to -162.29 (m, 2F) ppm; IR (KBr pellet): ν 3472, 1654, 1509, 1425, 1347, 1287, 1188, 1139, 1037, 987, 828, 828, 810, 712, 663, 595, 522, 453 cm<sup>-1</sup>; Elemental analysis (%) calcd for C<sub>9</sub>H<sub>4</sub>F<sub>5</sub>N<sub>5</sub>O<sub>4</sub> (341.01): C, 31.69; H, 1.18; N, 20.53; found: C, 31.92; H, 1.34; N, 20.22.

**1-(2-(1,3-Dichloropropan-2-ylidene)hydrazineyl)-2,2-dinitroethen-1-amine (10):** HFOX (0.25 g, 1.53 mmol) and 1,3-dichloropropan-2-one (0.19 g, 1.53 mol) were mixed in distilled water (10 mL). To this, a few drops of concentrated HCl was added to maintain pH~2, and the resulting mixture was stirred at room temperature for 4 hours. A pale-yellow precipitate formed and was

collected by filtration and dried at room temperature to give compound **10** (0.41 g, 98%).  $T_m$  (onset): 117 °C;  $T_d$  (onset): 135 °C;  $^1\text{H}$  NMR (DMSO- $d_6$ ): 12.55 (s, 1H, NH), 10.30 (s, 1H, NH $_2$ ), 9.85 (s, 12H, NH $_2$ ), 4.53 (s, 2H, CH $_2$ ), 4.51 (s, 2H, CH $_2$ ) ppm;  $^{13}\text{C}$  NMR (DMSO- $d_6$ ): 155.6, 154.5, 125.3, 45.2, 34.9 ppm. IR (KBr pellet):  $\nu$  3418, 3308, 3017, 1540, 1360, 1225, 1141, 1062, 957, 906, 873, 851, 789, 755, 713, 699, 633  $\text{cm}^{-1}$ ; Elemental analysis (%) calcd for  $\text{C}_5\text{H}_7\text{Cl}_2\text{N}_5\text{O}_4$  (270.98): C, 22.08; H, 2.59; N, 25.74; found: C, 22.19; H, 2.70; N, 26.38.

**1-(2-(1,3-Diazidopropan-2-ylidene)hydrazineyl)-2,2-dinitroethen-1-amine (11)**: HFOX (0.15 g, 0.92 mmol) and diazo carbonyl compound (0.13 g, 0.92 mmol) were mixed in distilled water (10 mL). A few drops of concentrated HCl were added to this mixture to maintain pH~2, and the resulting mixture was stirred at room temperature for 6 hours. A yellow precipitate formed and was collected by filtration and dried at room temperature to give a yellow solid of **11** (0.27 g, 93%)  $T_d$  (onset): 160 °C;  $^1\text{H}$  NMR (DMSO- $d_6$ ): 13.36 (s, 1H, NH), 10.16 (s, 1H, NH $_2$ ), 9.43 (s, 12H, NH $_2$ ), 8.43 (s, 1H, CH) ppm;  $^{13}\text{C}$  NMR (DMSO- $d_6$ ): 154.3, 146.9, 143.5, 142.4, 140.4, 139.2, 125.7, 108.4 ppm. IR (KBr pellet):  $\nu$  3430, 3311, 3199, 2114, 1598, 1560, 1533, 1365, 1219, 1138, 1115, 1000, 907, 843, 787, 743, 683, 601, 457  $\text{cm}^{-1}$ ; Elemental analysis (%) calcd for  $\text{C}_5\text{H}_7\text{N}_{11}\text{O}_4$  (285.06): C, 21.06; H, 2.47; N, 54.03; found: C, 21.18; H, 2.53; N, 54.06.

**1-(1-Amino-2,2-dinitrovinyl)-3-methyl-5-(trifluoromethyl)-4,5-dihydro-1H-pyrazol-5-ol (12a)**: HFOX (0.24 g, 1.47 mmol) and 1,1,1-trifluoropentane-2,4-dione (0.23 g, 1.47 mmol) were mixed in distilled water (10 mL).. To this, a few drops of concentrated HCl was added to maintain a pH~2, and the resulting mixture was stirred at room temperature for 4 hours. A colorless precipitate formed and was collected by filtration and washed with an excess of water (5.0 mL) and dried at room temperature to give a colorless solid **12a** (0.33 g, 76%).  $T_d$  (onset): 184 °C;  $^1\text{H}$  NMR (DMSO- $d_6$ , ppm): 10.35 (s, 1H), 9.61 (s, 1H), 9.31 (s, 1H), 3.70-3.43 (q, 2H), 2.09 (s, 3H);  $^{13}\text{C}$  NMR (DMSO- $d_6$ , ppm): 163.7, 156.8, 154.8, 124.6, 120.8, 93.4, 92.9, 92.5, 46.2, 15.8.  $^{19}\text{F}$  NMR (DMSO- $d_6$ , ppm): -81.2. IR (KBr pellet):  $\nu$  3426, 2706, 1638, 1532, 1489, 1433, 1382, 1300, 1195, 1140, 1065, 950, 477  $\text{cm}^{-1}$ ;  $\text{C}_7\text{H}_8\text{F}_3\text{N}_5\text{O}_5$ (299.03): C, 28.10; H, 2.70; N, 23.41; found: C, 27.34; H, 3.01; N, 23.93.

**1-(1-Amino-2,2-dinitrovinyl)-3,5-bis(trifluoromethyl)-4,5-dihydro-1H-pyrazol-5-ol (12b)**: HFOX (0.30 g, 1.84 mmol) and hexafluoropentane-2,4-dione (0.38 g, 1.84 mmol) were mixed in distilled water (10 mL). To this, a few drops of concentrated HCl was added to maintain a pH~2, and the resulting mixture was stirred at ice-bath temperature for 30 minutes and then at room temperature for 6 hours. The solvent was removed using an air blower, which resulted in a white solid. The solid was washed with cold water (5.0 mL) and collected by filtration and dried at room temperature to give a colorless solid **12b** (0.41 g, 64%).  $T_d$  (onset): 171 °C;  $^1\text{H}$  NMR (DMSO- $d_6$ , ppm): 11.81 (s, 1H, OH), 10.03 (s, 2H, NH $_2$ ), 4.13-3.10 (m, 2H, CH $_2$ );  $^{13}\text{C}$  NMR (DMSO- $d_6$ , ppm): 156.8, 151.8-149.6 (q), 126.6, 126.6-116.8 (q), 95.2-93.0 (q), 81.1, 41.10.  $^{19}\text{F}$  NMR (DMSO- $d_6$ , ppm): -66.87, -80.98. IR (KBr pellet):  $\nu$  3429, 1574, 1535, 1461, 1431, 1327, 1271, 1191, 1104, 1019, 879, 850, 677  $\text{cm}^{-1}$ ; Elemental analysis (%) calcd for  $\text{C}_7\text{H}_6\text{F}_6\text{N}_5\text{O}_{5.5}$ (362.02): C, 23.22; H, 1.67; N, 19.34; found: C, 23.15; H, 2.15; N, 18.78.

## 2. Theoretical Calculations

The heats of formation for anions of **5-5f** and neutral compounds **9-11**, and **12-12b** were calculated based on isodesmic reactions (Scheme 1). The calculations were carried out using Gaussian 03 (Revision D.01) suite of programs.<sup>2</sup> All the structures were optimized, and frequency analyses were calculated at the B3LYP/6-31+G\*\* level and single energy points were calculated at the MP2/6-311++G\*\* level. The solid-state heats of formation for neutral compounds (**9**, **10**, **12a**, and **12b**) were calculated based on Trouton's rule according to equation 1 ( $T$  represents melting temperature).<sup>3</sup>

$$\Delta H_{sub} = 188/Jmol^{-1}K^{-1} \times T \quad (1)$$

For salts, the solid-state enthalpy of formation is obtained using a Born–Haber energy cycle.<sup>4</sup>

### Scheme 1

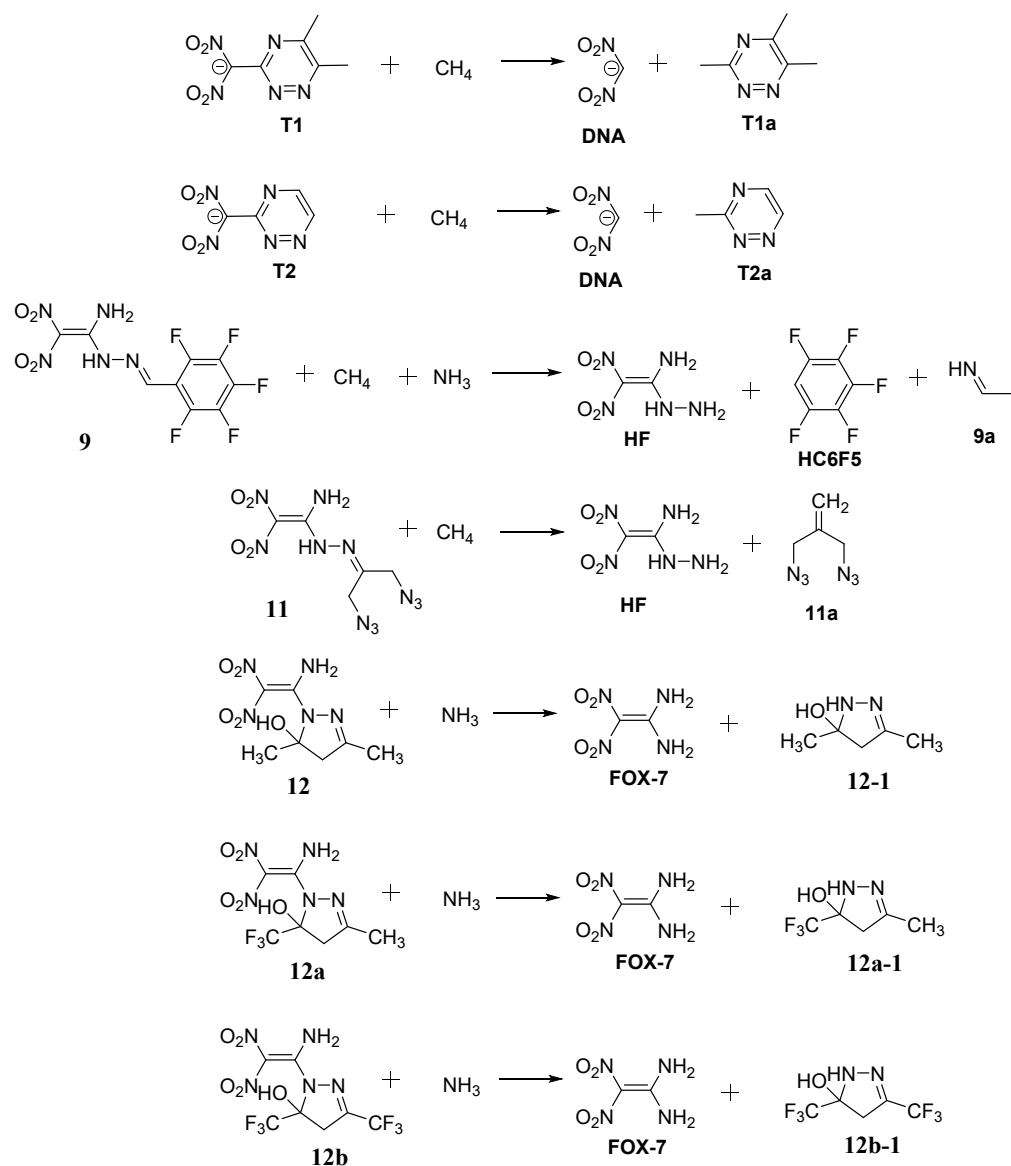

**Table S1** Calculated zero point energy (ZPE), values of the correction (Hr), total energy (E0) and gas-state heats of formation (HOF).

| Compound                           | ZPE                 | HT                  | E0                      | HOF                           |
|------------------------------------|---------------------|---------------------|-------------------------|-------------------------------|
|                                    | [Hartree /Particle] | [Hartree /Particle] | [kJ mol <sup>-1</sup> ] | (gas) [kJ mol <sup>-1</sup> ] |
| <b>T1</b>                          | 0.138464            | 0.153194            | -804.8998915            | -8.47                         |
| <b>T1a</b>                         | 0.146460            | 0.156596            | -397.2408086            | 173.25                        |
| <b>T2</b>                          | 0.083633            | 0.094951            | -726.4910676            | 86.27                         |
| <b>T2a</b>                         | 0.091461            | 0.098313            | -318.8300122            | 273.10                        |
| <b>DNA</b>                         | 0.036739            | 0.042196            | -447.9434569            | -14.14                        |
| <b>9</b>                           | 0.153515            | 0.174552            | -1415.970394            | -692.58                       |
| <b>HF</b>                          | 0.109516            | 0.120809            | -652.2173912            | 66.15                         |
| <b>HC<sub>6</sub>F<sub>5</sub></b> | 0.059621            | 0.069237            | -726.9385768            | -850.17                       |

|                       |          |          |               |          |
|-----------------------|----------|----------|---------------|----------|
| <b>9a</b>             | 0.068467 | 0.073344 | -133.5862623  | 36.79    |
| <b>11</b>             | 0.176603 | 0.196718 | -1095.0752785 | 745.51   |
| <b>11a</b>            | 0.104667 | 0.115516 | -499.2526806  | 691.08   |
| <b>12</b>             | 0.208621 | 0.225844 | -920.8980753  | -226.78  |
| <b>12a</b>            | 0.184064 | 0.203903 | -1218.1428151 | -869.78  |
| <b>12b</b>            | 0.160902 | 0.182745 | -1515.3873553 | -1469.47 |
| <b>12-1</b>           | 0.152908 | 0.16227  | -380.2818367  | -122.71  |
| <b>12a-1</b>          | 0.12944  | 0.140983 | -677.5378422  | -793.68  |
| <b>12b-1</b>          | 0.106555 | 0.119911 | -974.7875549  | 1406.75  |
| <b>FOX-7</b>          | 0.09195  | 0.102165 | -597.0259689  | -134.1   |
| <b>NH<sub>3</sub></b> | 0.034384 | 0.038203 | -56.4154647   | -45.90   |
| <b>CH<sub>4</sub></b> | 0.044793 | 0.048605 | -40.3796224   | -74.60   |

<sup>a</sup> The enthalpy of sublimation was calculated by using Trouton's rule. Solid-state heats of formation of the resulting compounds were calculated with Equation (1) in which  $T_m$  is the melting temperature.

$$\Delta H_f = \Delta H_f(g) - \Delta H_{sub} = \Delta H_f(g) - 188[\text{J mol}^{-1} \text{K}^{-1}] \times T_m \quad (1)$$

### 3. X-ray Crystallographic data<sup>5-11</sup>

**Table S2.** Crystallographic data and structure refinement details for **5 (Forms i and ii)**, **5c** and **5e**



| Compound                                      | 5 (Form i)                                                   | 5 (Form ii)                                                  | 5c                                                           | 5e                                                            |
|-----------------------------------------------|--------------------------------------------------------------|--------------------------------------------------------------|--------------------------------------------------------------|---------------------------------------------------------------|
| Formula                                       | C <sub>6</sub> H <sub>6</sub> KN <sub>5</sub> O <sub>4</sub> | C <sub>6</sub> H <sub>6</sub> KN <sub>5</sub> O <sub>4</sub> | C <sub>6</sub> H <sub>10</sub> N <sub>6</sub> O <sub>4</sub> | C <sub>4</sub> H <sub>2</sub> N <sub>5</sub> NaO <sub>4</sub> |
| <i>D</i> <sub>calc.</sub> /g cm <sup>-3</sup> | 1.743                                                        | 1.728                                                        | 1.540                                                        | 1.931                                                         |
| $\mu$ /mm <sup>-1</sup>                       | 5.024                                                        | 4.981                                                        | 1.128                                                        | 2.011                                                         |
| Formula Weight                                | 251.26                                                       | 251.26                                                       | 230.20                                                       | 207.10                                                        |
| Color                                         | yellow                                                       | yellow                                                       | yellow                                                       | yellow                                                        |
| Shape                                         | block-shaped                                                 | needle-shaped                                                | block-shaped                                                 | needle-shaped                                                 |
| Size/mm <sup>3</sup>                          | 0.21×0.13×0.04                                               | 0.23×0.04×0.02                                               | 0.18×0.12×0.08                                               | 0.19×0.10×0.03                                                |
| <i>T</i> /K                                   | 99.98(15)                                                    | 99.98(16)                                                    | 100.00(10)                                                   | 100.00(10)                                                    |
| Crystal System                                | monoclinic                                                   | orthorhombic                                                 | triclinic                                                    | orthorhombic                                                  |
| Space Group                                   | <i>C</i> 2/ <i>c</i>                                         | <i>P</i> 2 <sub>1</sub> 2 <sub>1</sub>                       | <i>P</i> -1                                                  | <i>Pnma</i>                                                   |
| <i>a</i> /Å                                   | 18.0180(2)                                                   | 7.95992(19)                                                  | 5.96567(19)                                                  | 12.4451(2)                                                    |
| <i>b</i> /Å                                   | 12.9201(2)                                                   | 12.8763(3)                                                   | 7.3226(2)                                                    | 7.51185(15)                                                   |
| <i>c</i> /Å                                   | 8.26330(11)                                                  | 18.8416(5)                                                   | 11.8671(4)                                                   | 15.2435(2)                                                    |
| $\alpha$ /°                                   | 90                                                           | 90                                                           | 77.154(3)                                                    | 90                                                            |
| $\beta$ /°                                    | 95.5690(12)                                                  | 90                                                           | 81.278(3)                                                    | 90                                                            |
| $\gamma$ /°                                   | 90                                                           | 90                                                           | 81.757(3)                                                    | 90                                                            |
| <i>V</i> /Å <sup>3</sup>                      | 1914.57(5)                                                   | 1931.16(8)                                                   | 496.34(3)                                                    | 1425.06(4)                                                    |
| <i>Z</i>                                      | 8                                                            | 8                                                            | 2                                                            | 8                                                             |
| <i>Z</i> '                                    | 1                                                            | 2                                                            | 1                                                            | 1                                                             |
| Wavelength/Å                                  | 1.54184                                                      | 1.54184                                                      | 1.54184                                                      | 1.54184                                                       |
| Radiation type                                | Cu K <sub><math>\alpha</math></sub>                          | Cu K <sub><math>\alpha</math></sub>                          | Cu K <sub><math>\alpha</math></sub>                          | Cu K <sub><math>\alpha</math></sub>                           |
| $\theta$ <sub>min</sub> /°                    | 4.217                                                        | 4.159                                                        | 3.850                                                        | 4.587                                                         |
| $\theta$ <sub>max</sub> /°                    | 79.625                                                       | 80.359                                                       | 79.781                                                       | 79.507                                                        |
| Measured Refl's.                              | 13322                                                        | 9448                                                         | 5927                                                         | 6395                                                          |
| Ind't Refl's                                  | 2054                                                         | 3872                                                         | 2094                                                         | 1639                                                          |
| Refl's with <i>I</i> > 2( <i>I</i> )          | 1967                                                         | 3633                                                         | 1903                                                         | 1471                                                          |
| <i>R</i> <sub>int</sub>                       | 0.0494                                                       | 0.0465                                                       | 0.0271                                                       | 0.0247                                                        |
| Parameters                                    | 148                                                          | 294                                                          | 163                                                          | 163                                                           |
| Restraints                                    | 0                                                            | 0                                                            | 0                                                            | 0                                                             |
| Largest Peak                                  | 0.338                                                        | 0.366                                                        | 0.311                                                        | 0.287                                                         |
| Deepest Hole                                  | -0.321                                                       | -0.409                                                       | -0.289                                                       | -0.282                                                        |
| GooF                                          | 1.068                                                        | 1.134                                                        | 1.080                                                        | 1.063                                                         |
| <i>wR</i> <sub>2</sub> (all data)             | 0.0808                                                       | 0.1160                                                       | 0.0989                                                       | 0.0850                                                        |
| <i>wR</i> <sub>2</sub>                        | 0.0800                                                       | 0.1146                                                       | 0.0964                                                       | 0.0829                                                        |
| <i>R</i> <sub>1</sub> (all data)              | 0.0313                                                       | 0.0436                                                       | 0.0382                                                       | 0.0331                                                        |
| <i>R</i> <sub>1</sub>                         | 0.0304                                                       | 0.0412                                                       | 0.0358                                                       | 0.0295                                                        |
| <b>CCDC</b>                                   | <b>2154055</b>                                               | <b>2154056</b>                                               | <b>2154057</b>                                               | <b>2154058</b>                                                |

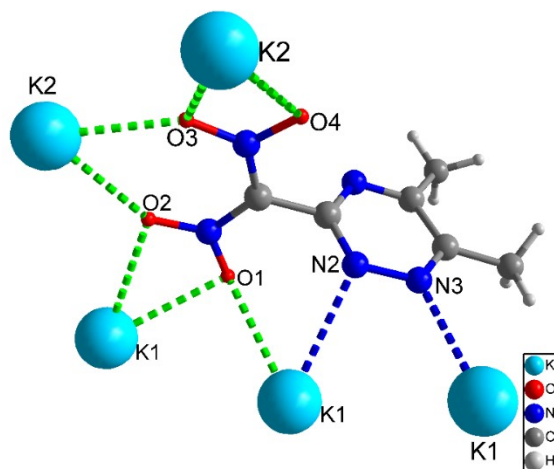

**Figure S1:** Thermal ellipsoids shown at 50% **5 (Form i)**.

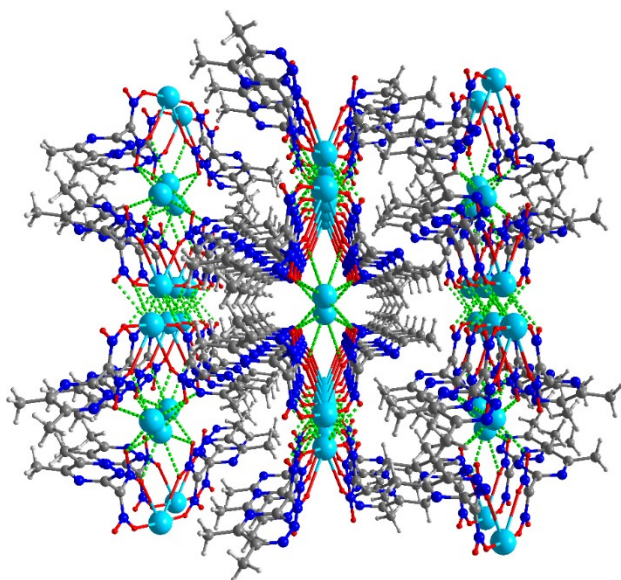

**Figure S2:** Ball-and-stick packing diagram of **5 (Form i)** viewed up the *c* axis

**Table S3:** Fractional Atomic Coordinates ( $\times 10^4$ ) and Equivalent Isotropic Displacement Parameters ( $\text{\AA}^2 \times 10^3$ ) for **5 (Form i)**.  $U_{eq}$  is defined as  $1/3$  of the trace of the orthogonalised  $U_{ij}$ .

| Atom | x         | y          | z          | $U_{eq}$  |
|------|-----------|------------|------------|-----------|
| K1   | 5000      | 4644.6(3)  | 7500       | 14.45(13) |
| K2   | 5000      | 796.8(3)   | 7500       | 16.15(13) |
| O1   | 5869.4(6) | 3979.1(8)  | 4897.8(12) | 16.6(2)   |
| O2   | 5512.8(6) | 2635.9(8)  | 6218.5(12) | 16.3(2)   |
| O3   | 5620.5(7) | 842.1(8)   | 4687.9(13) | 21.4(2)   |
| O4   | 6037.0(6) | 969.5(8)   | 2308.3(13) | 19.9(2)   |
| N1   | 7055.1(7) | 3001.3(9)  | 2455.8(14) | 14.0(2)   |
| N2   | 5828.0(7) | 3357.1(10) | 1217.8(14) | 14.8(3)   |
| N3   | 6113.0(7) | 3810.2(10) | -56.1(14)  | 14.6(2)   |

| Atom | x         | y          | z           | $U_{eq}$ |
|------|-----------|------------|-------------|----------|
| N4   | 5773.4(7) | 3010.5(10) | 5009.2(14)  | 13.5(2)  |
| N5   | 5868.8(7) | 1382.5(10) | 3608.4(14)  | 14.9(2)  |
| C1   | 5974.2(8) | 2432.3(11) | 3728.5(17)  | 13.8(3)  |
| C2   | 6305.8(8) | 2962.2(11) | 2380.1(17)  | 13.2(3)  |
| C3   | 7334.8(8) | 3486.7(11) | 1239.1(16)  | 13.1(3)  |
| C4   | 6846.8(8) | 3883.2(11) | -70.5(16)   | 14.1(3)  |
| C5   | 8160.8(8) | 3637.6(12) | 1320.0(18)  | 16.9(3)  |
| C6   | 7133.7(9) | 4412.1(13) | -1492.3(18) | 19.7(3)  |

**Table S4:** Anisotropic Displacement Parameters ( $\times 10^4$ ) for **5 (Form i)**. The anisotropic displacement factor exponent takes the form:  $-2\pi^2[h^2a^{*2} \times U_{11} + \dots + 2hka^* \times b^* \times U_{12}]$

| Atom | $U_{11}$ | $U_{22}$ | $U_{33}$ | $U_{23}$ | $U_{13}$ | $U_{12}$ |
|------|----------|----------|----------|----------|----------|----------|
| K1   | 15.6(2)  | 15.4(2)  | 12.3(2)  | 0        | 1.07(14) | 0        |
| K2   | 19.6(2)  | 13.5(2)  | 16.4(2)  | 0        | 6.99(16) | 0        |
| O1   | 21.3(5)  | 11.4(5)  | 17.5(5)  | -0.9(4)  | 3.7(4)   | -1.3(4)  |
| O2   | 21.0(5)  | 16.4(5)  | 12.3(5)  | 2.4(4)   | 6.1(4)   | 0.5(4)   |
| O3   | 32.8(6)  | 14.6(5)  | 19.0(5)  | 2.5(4)   | 13.0(5)  | -4.0(5)  |
| O4   | 29.3(6)  | 15.0(5)  | 16.9(5)  | -2.9(4)  | 9.6(4)   | -1.2(4)  |
| N1   | 16.2(6)  | 12.3(6)  | 13.8(6)  | -1.4(4)  | 2.0(4)   | 0.7(5)   |
| N2   | 16.1(6)  | 14.6(6)  | 14.1(6)  | 1.0(5)   | 2.9(4)   | -0.4(5)  |
| N3   | 17.1(6)  | 13.2(6)  | 13.6(5)  | 0.8(4)   | 2.4(4)   | 0.2(4)   |
| N4   | 13.8(5)  | 13.6(6)  | 13.0(5)  | 0.9(4)   | 1.0(4)   | 0.2(4)   |
| N5   | 16.9(6)  | 13.4(6)  | 14.8(5)  | 0.5(4)   | 4.0(4)   | 0.3(5)   |
| C1   | 16.1(7)  | 12.4(7)  | 13.3(6)  | 0.0(5)   | 3.1(5)   | -0.1(5)  |
| C2   | 16.0(6)  | 10.6(6)  | 13.2(6)  | -2.2(5)  | 3.1(5)   | -0.4(5)  |
| C3   | 15.7(6)  | 10.1(6)  | 14.0(6)  | -2.0(5)  | 3.2(5)   | -0.4(5)  |
| C4   | 17.4(6)  | 10.5(6)  | 14.6(6)  | -0.7(5)  | 3.6(5)   | 0.9(5)   |
| C5   | 14.3(7)  | 18.0(7)  | 18.8(7)  | -0.4(5)  | 3.5(5)   | 0.0(5)   |
| C6   | 21.2(7)  | 20.4(7)  | 18.3(7)  | 6.6(6)   | 5.4(6)   | 3.2(6)   |

**Table S5:** Bond Lengths in Å for **5 (Form i)**.

| Atom | Atom            | Length/Å   |
|------|-----------------|------------|
| K1   | O1 <sup>1</sup> | 2.9104(10) |
| K1   | O1 <sup>2</sup> | 2.9898(11) |
| K1   | O1 <sup>3</sup> | 2.9898(11) |
| K1   | O1              | 2.9104(10) |
| K1   | O2              | 2.9834(11) |
| K1   | O2 <sup>1</sup> | 2.9834(11) |
| K1   | N2 <sup>2</sup> | 3.2127(13) |
| K1   | N2 <sup>3</sup> | 3.2127(13) |
| K1   | N3 <sup>4</sup> | 2.9113(12) |
| K1   | N3 <sup>5</sup> | 2.9113(12) |
| K1   | N4 <sup>1</sup> | 3.3455(12) |
| K1   | N4              | 3.3455(12) |
| K2   | O2              | 2.7949(11) |

| Atom | Atom            | Length/Å   |
|------|-----------------|------------|
| K2   | O2 <sup>1</sup> | 2.7948(11) |
| K2   | O3 <sup>6</sup> | 2.9343(12) |
| K2   | O3 <sup>1</sup> | 2.6753(11) |
| K2   | O3              | 2.6753(11) |
| K2   | O3 <sup>7</sup> | 2.9343(12) |
| K2   | O4 <sup>6</sup> | 2.9634(11) |
| K2   | O4 <sup>7</sup> | 2.9634(11) |
| K2   | N5 <sup>7</sup> | 3.3075(13) |
| K2   | N5 <sup>6</sup> | 3.3075(13) |
| K2   | C5 <sup>8</sup> | 3.4409(14) |
| K2   | C5 <sup>9</sup> | 3.4409(14) |
| O1   | N4              | 1.2679(16) |
| O2   | N4              | 1.2427(16) |
| O3   | N5              | 1.2493(16) |
| O4   | N5              | 1.2625(16) |
| N1   | C2              | 1.3465(19) |
| N1   | C3              | 1.3253(18) |
| N2   | N3              | 1.3489(17) |
| N2   | C2              | 1.3279(18) |
| N3   | C4              | 1.3268(19) |
| N4   | C1              | 1.3724(18) |
| N5   | C1              | 1.3719(19) |
| C1   | C2              | 1.4820(19) |
| C3   | C4              | 1.4219(19) |
| C3   | C5              | 1.4959(19) |
| C4   | C6              | 1.4941(19) |

—<sup>1</sup>1-x,+y,3/2-z; <sup>2</sup>1-x,1-y,1-z; <sup>3</sup>+x,1-y,1/2+z; <sup>4</sup>1-x,+y,1/2-z; <sup>5</sup>+x,+y,1+z; <sup>6</sup>1-x,-y,1-z; <sup>7</sup>+x,-y,1/2+z; <sup>8</sup>-1/2+x,1/2-y,1/2+z; <sup>9</sup>3/2-x,1/2-y,1-z

**Table S6:** Bond Angles in ° for **5 (Form i)**.

| Atom            | Atom | Atom            | Angle/°   |
|-----------------|------|-----------------|-----------|
| O1 <sup>1</sup> | K1   | O1              | 145.63(4) |
| O1 <sup>2</sup> | K1   | O1 <sup>3</sup> | 107.01(4) |
| O1 <sup>1</sup> | K1   | O1 <sup>3</sup> | 112.36(4) |
| O1 <sup>1</sup> | K1   | O1 <sup>2</sup> | 88.34(3)  |
| O1              | K1   | O1 <sup>2</sup> | 112.36(4) |
| O1              | K1   | O1 <sup>3</sup> | 88.34(3)  |
| O1              | K1   | O2              | 43.39(3)  |
| O1 <sup>1</sup> | K1   | O2              | 102.28(3) |
| O1 <sup>1</sup> | K1   | O2 <sup>1</sup> | 43.39(3)  |
| O1              | K1   | O2 <sup>1</sup> | 102.28(3) |
| O1              | K1   | N2 <sup>3</sup> | 141.40(3) |
| O1 <sup>3</sup> | K1   | N2 <sup>2</sup> | 62.20(3)  |
| O1 <sup>1</sup> | K1   | N2 <sup>3</sup> | 72.14(3)  |
| O1 <sup>3</sup> | K1   | N2 <sup>3</sup> | 60.68(3)  |
| O1 <sup>2</sup> | K1   | N2 <sup>3</sup> | 62.20(3)  |

| Atom            | Atom | Atom            | Angle/°   |
|-----------------|------|-----------------|-----------|
| O1 <sup>1</sup> | K1   | N2 <sup>2</sup> | 141.40(3) |
| O1              | K1   | N2 <sup>2</sup> | 72.14(3)  |
| O1 <sup>2</sup> | K1   | N2 <sup>2</sup> | 60.68(3)  |
| O1 <sup>1</sup> | K1   | N3 <sup>4</sup> | 91.10(3)  |
| O1 <sup>1</sup> | K1   | N3 <sup>5</sup> | 76.23(3)  |
| O1              | K1   | N3 <sup>4</sup> | 76.23(3)  |
| O1              | K1   | N3 <sup>5</sup> | 91.10(3)  |
| O1              | K1   | N4              | 22.00(3)  |
| O1 <sup>3</sup> | K1   | N4 <sup>1</sup> | 124.08(3) |
| O1 <sup>1</sup> | K1   | N4              | 123.66(3) |
| O1 <sup>3</sup> | K1   | N4              | 100.97(3) |
| O1 <sup>2</sup> | K1   | N4              | 124.08(3) |
| O1              | K1   | N4 <sup>1</sup> | 123.66(3) |
| O1 <sup>2</sup> | K1   | N4 <sup>1</sup> | 100.97(3) |
| O1 <sup>1</sup> | K1   | N4 <sup>1</sup> | 22.00(3)  |
| O2              | K1   | O1 <sup>3</sup> | 116.27(3) |
| O2 <sup>1</sup> | K1   | O1 <sup>2</sup> | 116.27(3) |
| O2 <sup>1</sup> | K1   | O1 <sup>3</sup> | 126.32(3) |
| O2              | K1   | O1 <sup>2</sup> | 126.31(3) |
| O2              | K1   | O2 <sup>1</sup> | 59.10(4)  |
| O2 <sup>1</sup> | K1   | N2 <sup>3</sup> | 114.35(3) |
| O2              | K1   | N2 <sup>3</sup> | 170.37(3) |
| O2 <sup>1</sup> | K1   | N2 <sup>2</sup> | 170.37(3) |
| O2              | K1   | N2 <sup>2</sup> | 114.35(3) |
| O2 <sup>1</sup> | K1   | N4              | 80.28(3)  |
| O2              | K1   | N4              | 21.69(3)  |
| O2 <sup>1</sup> | K1   | N4 <sup>1</sup> | 21.69(3)  |
| O2              | K1   | N4 <sup>1</sup> | 80.28(3)  |
| N2 <sup>2</sup> | K1   | N2 <sup>3</sup> | 73.04(4)  |
| N2 <sup>3</sup> | K1   | N4              | 160.83(3) |
| N2 <sup>2</sup> | K1   | N4              | 94.00(3)  |
| N2 <sup>3</sup> | K1   | N4 <sup>1</sup> | 94.00(3)  |
| N2 <sup>2</sup> | K1   | N4 <sup>1</sup> | 160.83(3) |
| N3 <sup>4</sup> | K1   | O1 <sup>3</sup> | 58.62(3)  |
| N3 <sup>5</sup> | K1   | O1 <sup>2</sup> | 58.62(3)  |
| N3 <sup>5</sup> | K1   | O1 <sup>3</sup> | 164.00(3) |
| N3 <sup>4</sup> | K1   | O1 <sup>2</sup> | 164.00(3) |
| N3 <sup>4</sup> | K1   | O2              | 69.38(3)  |
| N3 <sup>5</sup> | K1   | O2              | 73.01(3)  |
| N3 <sup>5</sup> | K1   | O2 <sup>1</sup> | 69.38(3)  |
| N3 <sup>4</sup> | K1   | O2 <sup>1</sup> | 73.01(3)  |
| N3 <sup>4</sup> | K1   | N2 <sup>2</sup> | 112.30(3) |
| N3 <sup>5</sup> | K1   | N2 <sup>3</sup> | 112.30(3) |
| N3 <sup>4</sup> | K1   | N2 <sup>3</sup> | 102.46(3) |
| N3 <sup>5</sup> | K1   | N2 <sup>2</sup> | 102.46(3) |
| N3 <sup>4</sup> | K1   | N3 <sup>5</sup> | 136.53(5) |
| N3 <sup>4</sup> | K1   | N4              | 68.87(3)  |

| Atom            | Atom | Atom            | Angle/°   |
|-----------------|------|-----------------|-----------|
| N3 <sup>5</sup> | K1   | N4              | 83.86(3)  |
| N3 <sup>4</sup> | K1   | N4 <sup>1</sup> | 83.86(3)  |
| N3 <sup>5</sup> | K1   | N4 <sup>1</sup> | 68.87(3)  |
| N4 <sup>1</sup> | K1   | N4              | 101.74(4) |
| O2 <sup>1</sup> | K2   | O2              | 63.53(4)  |
| O2              | K2   | O3 <sup>6</sup> | 120.02(3) |
| O2              | K2   | O3 <sup>7</sup> | 136.62(3) |
| O2 <sup>1</sup> | K2   | O3 <sup>6</sup> | 136.62(3) |
| O2 <sup>1</sup> | K2   | O3 <sup>7</sup> | 120.02(3) |
| O2              | K2   | O4 <sup>6</sup> | 155.28(3) |
| O2              | K2   | O4 <sup>7</sup> | 113.65(3) |
| O2 <sup>1</sup> | K2   | O4 <sup>7</sup> | 155.27(3) |
| O2 <sup>1</sup> | K2   | O4 <sup>6</sup> | 113.65(3) |
| O2              | K2   | N5 <sup>6</sup> | 141.61(3) |
| O2              | K2   | N5 <sup>7</sup> | 131.58(3) |
| O2 <sup>1</sup> | K2   | N5 <sup>7</sup> | 141.61(3) |
| O2 <sup>1</sup> | K2   | N5 <sup>6</sup> | 131.58(3) |
| O2 <sup>1</sup> | K2   | C5 <sup>8</sup> | 93.26(3)  |
| O2              | K2   | C5 <sup>8</sup> | 65.30(3)  |
| O2 <sup>1</sup> | K2   | C5 <sup>9</sup> | 65.30(3)  |
| O2              | K2   | C5 <sup>9</sup> | 93.26(3)  |
| O3 <sup>1</sup> | K2   | O2              | 119.47(3) |
| O3 <sup>1</sup> | K2   | O2 <sup>1</sup> | 58.06(3)  |
| O3              | K2   | O2              | 58.06(3)  |
| O3              | K2   | O2 <sup>1</sup> | 119.47(3) |
| O3              | K2   | O3 <sup>7</sup> | 112.62(3) |
| O3 <sup>6</sup> | K2   | O3 <sup>7</sup> | 87.62(5)  |
| O3              | K2   | O3 <sup>1</sup> | 177.49(5) |
| O3 <sup>1</sup> | K2   | O3 <sup>6</sup> | 112.62(3) |
| O3              | K2   | O3 <sup>6</sup> | 69.33(4)  |
| O3 <sup>1</sup> | K2   | O3 <sup>7</sup> | 69.33(4)  |
| O3 <sup>6</sup> | K2   | O4 <sup>6</sup> | 43.34(3)  |
| O3              | K2   | O4 <sup>6</sup> | 112.46(3) |
| O3 <sup>6</sup> | K2   | O4 <sup>7</sup> | 67.41(3)  |
| O3 <sup>7</sup> | K2   | O4 <sup>6</sup> | 67.41(3)  |
| O3 <sup>1</sup> | K2   | O4 <sup>6</sup> | 69.61(3)  |
| O3 <sup>7</sup> | K2   | O4 <sup>7</sup> | 43.34(3)  |
| O3 <sup>1</sup> | K2   | O4 <sup>7</sup> | 112.47(3) |
| O3              | K2   | O4 <sup>7</sup> | 69.61(3)  |
| O3 <sup>6</sup> | K2   | N5 <sup>6</sup> | 22.06(3)  |
| O3              | K2   | N5 <sup>7</sup> | 91.87(3)  |
| O3 <sup>1</sup> | K2   | N5 <sup>6</sup> | 91.87(3)  |
| O3 <sup>6</sup> | K2   | N5 <sup>7</sup> | 72.43(3)  |
| O3 <sup>1</sup> | K2   | N5 <sup>7</sup> | 90.26(3)  |
| O3 <sup>7</sup> | K2   | N5 <sup>7</sup> | 22.06(3)  |
| O3 <sup>7</sup> | K2   | N5 <sup>6</sup> | 72.43(3)  |
| O3              | K2   | N5 <sup>6</sup> | 90.26(3)  |

| Atom            | Atom | Atom             | Angle/°    |
|-----------------|------|------------------|------------|
| O3              | K2   | C5 <sup>8</sup>  | 76.66(4)   |
| O3              | K2   | C5 <sup>9</sup>  | 102.79(4)  |
| O3 <sup>6</sup> | K2   | C5 <sup>9</sup>  | 71.32(3)   |
| O3 <sup>1</sup> | K2   | C5 <sup>8</sup>  | 102.79(4)  |
| O3 <sup>1</sup> | K2   | C5 <sup>9</sup>  | 76.66(4)   |
| O3 <sup>7</sup> | K2   | C5 <sup>9</sup>  | 128.81(4)  |
| O3 <sup>7</sup> | K2   | C5 <sup>8</sup>  | 71.32(3)   |
| O3 <sup>6</sup> | K2   | C5 <sup>8</sup>  | 128.81(3)  |
| O4 <sup>6</sup> | K2   | O4 <sup>7</sup>  | 79.28(4)   |
| O4 <sup>7</sup> | K2   | N5 <sup>6</sup>  | 67.27(3)   |
| O4 <sup>7</sup> | K2   | N5 <sup>7</sup>  | 22.37(3)   |
| O4 <sup>6</sup> | K2   | N5 <sup>6</sup>  | 22.37(3)   |
| O4 <sup>6</sup> | K2   | N5 <sup>7</sup>  | 67.27(3)   |
| O4 <sup>6</sup> | K2   | C5 <sup>9</sup>  | 65.40(3)   |
| O4 <sup>7</sup> | K2   | C5 <sup>8</sup>  | 65.40(3)   |
| O4 <sup>6</sup> | K2   | C5 <sup>8</sup>  | 138.01(4)  |
| O4 <sup>7</sup> | K2   | C5 <sup>9</sup>  | 138.01(4)  |
| N5 <sup>6</sup> | K2   | N5 <sup>7</sup>  | 63.29(4)   |
| N5 <sup>7</sup> | K2   | C5 <sup>9</sup>  | 132.55(3)  |
| N5 <sup>7</sup> | K2   | C5 <sup>8</sup>  | 71.66(3)   |
| N5 <sup>6</sup> | K2   | C5 <sup>8</sup>  | 132.55(3)  |
| N5 <sup>6</sup> | K2   | C5 <sup>9</sup>  | 71.66(3)   |
| C5 <sup>8</sup> | K2   | C5 <sup>9</sup>  | 155.48(5)  |
| K1              | O1   | K1 <sup>3</sup>  | 91.66(3)   |
| N4              | O1   | K1               | 98.68(8)   |
| N4              | O1   | K1 <sup>3</sup>  | 124.67(8)  |
| K2              | O2   | K1               | 118.68(4)  |
| N4              | O2   | K1               | 95.79(8)   |
| N4              | O2   | K2               | 143.17(9)  |
| K2              | O3   | K2 <sup>6</sup>  | 110.67(4)  |
| N5              | O3   | K2               | 147.27(9)  |
| N5              | O3   | K2 <sup>6</sup>  | 96.02(8)   |
| N5              | O4   | K2 <sup>6</sup>  | 94.32(8)   |
| C3              | N1   | C2               | 115.84(12) |
| N3              | N2   | K1 <sup>3</sup>  | 97.63(8)   |
| C2              | N2   | K1 <sup>3</sup>  | 111.07(9)  |
| C2              | N2   | N3               | 117.52(12) |
| N2              | N3   | K1 <sup>10</sup> | 114.41(8)  |
| C4              | N3   | K1 <sup>10</sup> | 125.97(9)  |
| C4              | N3   | N2               | 119.54(12) |
| O1              | N4   | K1               | 59.31(7)   |
| O1              | N4   | C1               | 115.67(12) |
| O2              | N4   | K1               | 62.52(7)   |
| O2              | N4   | O1               | 120.51(12) |
| O2              | N4   | C1               | 123.82(12) |
| C1              | N4   | K1               | 167.08(9)  |
| O3              | N5   | K2 <sup>6</sup>  | 61.92(7)   |

| Atom | Atom | Atom            | Angle/°    |
|------|------|-----------------|------------|
| O3   | N5   | O4              | 120.24(12) |
| O3   | N5   | C1              | 123.89(12) |
| O4   | N5   | K2 <sup>6</sup> | 63.31(7)   |
| O4   | N5   | C1              | 115.87(12) |
| C1   | N5   | K2 <sup>6</sup> | 156.96(9)  |
| N4   | C1   | C2              | 118.95(13) |
| N5   | C1   | N4              | 123.29(13) |
| N5   | C1   | C2              | 117.74(12) |
| N1   | C2   | C1              | 117.25(12) |
| N2   | C2   | N1              | 126.58(13) |
| N2   | C2   | C1              | 116.16(12) |
| N1   | C3   | C4              | 119.68(13) |
| N1   | C3   | C5              | 118.53(12) |
| C4   | C3   | C5              | 121.74(13) |
| N3   | C4   | C3              | 120.72(13) |
| N3   | C4   | C6              | 117.43(12) |
| C3   | C4   | C6              | 121.84(13) |
| C3   | C5   | K2 <sup>8</sup> | 165.22(10) |

—<sup>1</sup>1-x,+y,3/2-z; <sup>2</sup>+x,1-y,1/2+z; <sup>3</sup>1-x,1-y,1-z; <sup>4</sup>1-x,+y,1/2-z; <sup>5</sup>+x,+y,1+z; <sup>6</sup>1-x,-y,1-z; <sup>7</sup>+x,-y,1/2+z; <sup>8</sup>3/2-x,1/2-y,1-z; <sup>9</sup>-1/2+x,1/2-y,1/2+z; <sup>10</sup>+x,+y,-1+z

**Table S7:** Torsion Angles in ° for **5 (Form i)**.

| Atom            | Atom | Atom | Atom            | Angle/°     |
|-----------------|------|------|-----------------|-------------|
| K1 <sup>1</sup> | O1   | N4   | K1              | -98.12(8)   |
| K1              | O1   | N4   | O2              | -13.51(13)  |
| K1 <sup>1</sup> | O1   | N4   | O2              | -111.63(11) |
| K1              | O1   | N4   | C1              | 166.48(10)  |
| K1 <sup>1</sup> | O1   | N4   | C1              | 68.36(14)   |
| K1              | O2   | N4   | O1              | 13.09(12)   |
| K1              | O2   | N4   | C1              | -166.90(11) |
| K1 <sup>1</sup> | N2   | N3   | K1 <sup>2</sup> | -61.23(7)   |
| K1 <sup>1</sup> | N2   | N3   | C4              | 115.81(12)  |
| K1 <sup>1</sup> | N2   | C2   | N1              | -108.35(13) |
| K1 <sup>1</sup> | N2   | C2   | C1              | 71.25(13)   |
| K1 <sup>2</sup> | N3   | C4   | C3              | 176.85(9)   |
| K1 <sup>2</sup> | N3   | C4   | C6              | -2.04(18)   |
| K1              | N4   | C1   | N5              | -112.1(4)   |
| K1              | N4   | C1   | C2              | 66.4(5)     |
| K2              | O2   | N4   | K1              | 160.06(15)  |
| K2              | O2   | N4   | O1              | 173.14(10)  |
| K2              | O2   | N4   | C1              | -6.8(2)     |
| K2              | O3   | N5   | K2 <sup>3</sup> | -145.12(18) |
| K2              | O3   | N5   | O4              | -170.93(12) |
| K2 <sup>3</sup> | O3   | N5   | O4              | -25.81(13)  |
| K2 <sup>3</sup> | O3   | N5   | C1              | 153.91(12)  |
| K2              | O3   | N5   | C1              | 8.8(3)      |
| K2 <sup>3</sup> | O4   | N5   | O3              | 25.47(13)   |



| Atom            | Atom | Atom | Atom            | Angle/°     |
|-----------------|------|------|-----------------|-------------|
| K2 <sup>3</sup> | O4   | N5   | C1              | -154.27(10) |
| K2 <sup>3</sup> | N5   | C1   | N4              | 93.3(2)     |
| K2 <sup>3</sup> | N5   | C1   | C2              | -85.2(3)    |
| O1              | N4   | C1   | N5              | -176.21(13) |
| O1              | N4   | C1   | C2              | 2.28(18)    |
| O2              | N4   | C1   | N5              | 3.8(2)      |
| O2              | N4   | C1   | C2              | -177.73(12) |
| O3              | N5   | C1   | N4              | -4.2(2)     |
| O3              | N5   | C1   | C2              | 177.27(13)  |
| O4              | N5   | C1   | N4              | 175.51(13)  |
| O4              | N5   | C1   | C2              | -3.00(19)   |
| N1              | C3   | C4   | N3              | 2.8(2)      |
| N1              | C3   | C4   | C6              | -178.38(13) |
| N1              | C3   | C5   | K2 <sup>4</sup> | -48.1(4)    |
| N2              | N3   | C4   | C3              | 0.2(2)      |
| N2              | N3   | C4   | C6              | -178.71(13) |
| N3              | N2   | C2   | N1              | 2.8(2)      |
| N3              | N2   | C2   | C1              | -177.58(12) |
| N4              | C1   | C2   | N1              | 94.45(16)   |
| N4              | C1   | C2   | N2              | -85.20(16)  |
| N5              | C1   | C2   | N1              | -86.98(16)  |
| N5              | C1   | C2   | N2              | 93.38(16)   |
| C2              | N1   | C3   | C4              | -2.81(19)   |
| C2              | N1   | C3   | C5              | 174.81(12)  |
| C2              | N2   | N3   | K1 <sup>2</sup> | -179.83(9)  |
| C2              | N2   | N3   | C4              | -2.79(19)   |
| C3              | N1   | C2   | N2              | 0.1(2)      |
| C3              | N1   | C2   | C1              | -179.52(12) |
| C4              | C3   | C5   | K2 <sup>4</sup> | 129.5(3)    |
| C5              | C3   | C4   | N3              | -174.77(13) |
| C5              | C3   | C4   | C6              | 4.1(2)      |

—<sup>1</sup>1-x,1-y,1-z; <sup>2</sup>+x,+y,-1+z; <sup>3</sup>1-x,-y,1-z; <sup>4</sup>3/2-x,1/2-y,1-z

**Table S8:** Hydrogen Fractional Atomic Coordinates ( $\times 10^4$ ) and Equivalent Isotropic Displacement Parameters ( $\text{\AA}^2 \times 10^3$ ) for **5 (Form i)**.  $U_{eq}$  is defined as 1/3 of the trace of the orthogonalised  $U_{ij}$ .

| Atom | x       | y       | z        | $U_{eq}$ |
|------|---------|---------|----------|----------|
| H5A  | 8282.49 | 4358.82 | 1601.13  | 25       |
| H5B  | 8333.83 | 3474.1  | 261.14   | 25       |
| H5C  | 8407.04 | 3178.85 | 2150.76  | 25       |
| H6A  | 6714.92 | 4587.28 | -2291.93 | 30       |
| H6B  | 7477.27 | 3949.55 | -1992    | 30       |
| H6C  | 7397.06 | 5046.22 | -1125.68 | 30       |

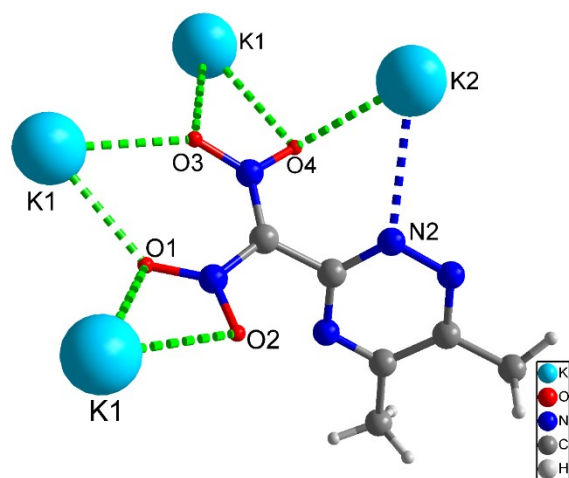

**Figure S3:** Thermal ellipsoids shown at 50% **5 (Form ii)**.

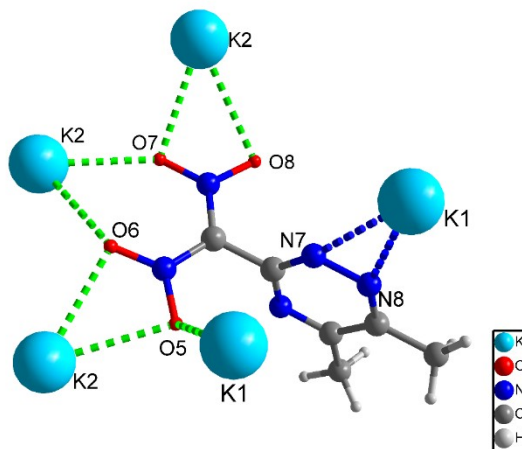

**Figure S4:** Thermal ellipsoids shown at 50% **5 (Form ii)**.

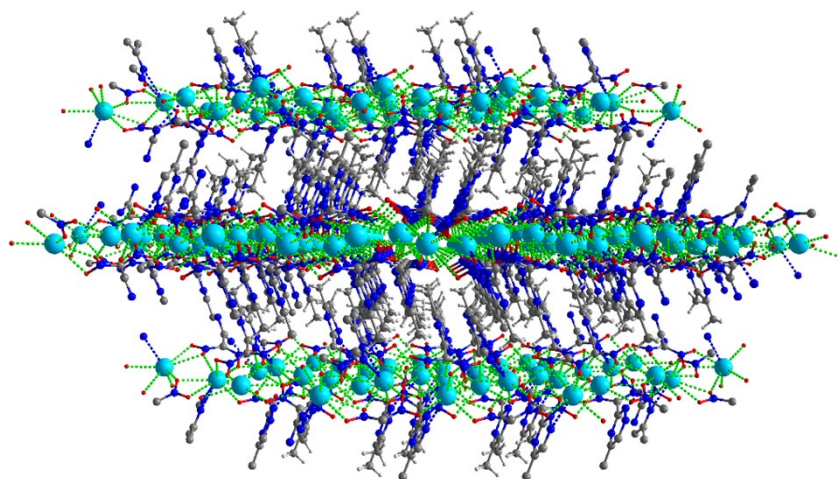

**Figure S5:** Ball-and-stick packing diagram of **5 (Form ii)** viewed up the b axis

**Table S9:** Fractional Atomic Coordinates ( $\times 10^4$ ) and Equivalent Isotropic Displacement Parameters ( $\text{\AA}^2 \times 10^3$ ) for **5 (Form ii)**.  $U_{eq}$  is defined as 1/3 of the trace of the orthogonalised  $U_{ij}$ .

| Atom | x          | y         | z          | $U_{eq}$ |
|------|------------|-----------|------------|----------|
| K1   | 8196.7(11) | 6757.9(6) | 5194.5(5)  | 20.4(2)  |
| K2   | 5249.4(11) | 1659.6(6) | 5129.6(5)  | 21.3(2)  |
| O1   | 9714(4)    | 8136(2)   | 4310.1(16) | 23.6(6)  |
| O2   | 11004(4)   | 9563(2)   | 4035.3(16) | 23.1(6)  |
| O3   | 6657(4)    | 8546(2)   | 4788.4(17) | 25.4(6)  |
| O4   | 5419(4)    | 9831(2)   | 4245.6(17) | 23.8(6)  |
| O5   | 7909(4)    | 4900(2)   | 4387.6(17) | 23.6(6)  |
| O6   | 6710(4)    | 3559(2)   | 4885.6(17) | 22.8(6)  |
| O7   | 3638(4)    | 3179(2)   | 4416.6(17) | 25.5(6)  |
| O8   | 2499(4)    | 4458(2)   | 3837.5(18) | 28.1(7)  |
| N1   | 8837(5)    | 10485(3)  | 2972.0(18) | 19.3(7)  |
| N2   | 7798(5)    | 11477(3)  | 3950(2)    | 25.9(8)  |
| N3   | 7962(5)    | 12358(3)  | 3571(2)    | 27.0(8)  |
| N4   | 9682(5)    | 9076(2)   | 4149.8(18) | 18.6(7)  |
| N5   | 6726(5)    | 9303(2)   | 4379(2)    | 20.5(7)  |
| N6   | 5921(5)    | 5487(3)   | 3025.5(19) | 20.2(7)  |
| N7   | 4756(5)    | 6441(3)   | 3991(2)    | 26.3(8)  |
| N8   | 4842(5)    | 7327(3)   | 3610(2)    | 27.2(8)  |
| N9   | 6638(5)    | 4322(2)   | 4484(2)    | 20.4(7)  |
| N10  | 3748(5)    | 4055(3)   | 4135(2)    | 20.8(7)  |
| C1   | 8190(5)    | 9632(3)   | 4072(2)    | 19.7(8)  |
| C2   | 8268(5)    | 10598(3)  | 3645(2)    | 20.3(8)  |
| C3   | 9005(5)    | 11348(3)  | 2598(2)    | 19.9(8)  |
| C4   | 8568(6)    | 12318(3)  | 2916(2)    | 22.5(8)  |
| C5   | 9633(6)    | 11275(3)  | 1858(2)    | 24.5(9)  |
| C6   | 8802(7)    | 13338(3)  | 2540(2)    | 28.5(9)  |
| C7   | 5218(5)    | 4621(3)   | 4122(2)    | 19.8(8)  |
| C8   | 5293(5)    | 5579(3)   | 3686(2)    | 19.1(8)  |
| C9   | 6024(5)    | 6357(3)   | 2651(2)    | 19.8(8)  |
| C10  | 5479(6)    | 7311(3)   | 2963(2)    | 21.3(8)  |
| C11  | 5596(6)    | 8326(3)   | 2581(2)    | 28.1(9)  |
| C31  | 6692(7)    | 6305(3)   | 1915(2)    | 28.1(9)  |

**Table S10:** Anisotropic Displacement Parameters ( $\times 10^4$ ) for **5 (Form ii)**. The anisotropic displacement factor exponent takes the form:  $-2\pi^2[h^2a^{*2} \times U_{11} + \dots + 2hka^* \times b^* \times U_{12}]$

| Atom | $U_{11}$ | $U_{22}$ | $U_{33}$ | $U_{23}$ | $U_{13}$ | $U_{12}$ |
|------|----------|----------|----------|----------|----------|----------|
| K1   | 20.3(4)  | 15.9(3)  | 24.9(4)  | 2.2(3)   | -1.3(3)  | -1.4(3)  |
| K2   | 20.9(4)  | 17.2(4)  | 25.9(4)  | 2.5(3)   | 0.3(3)   | -0.2(3)  |
| O1   | 29.8(15) | 13.1(11) | 27.8(14) | 3.5(11)  | 4.8(13)  | 3.2(12)  |
| O2   | 21.5(14) | 21.8(13) | 26.1(15) | 6.3(12)  | -1.1(12) | -1.5(12) |
| O3   | 24.7(14) | 22.3(13) | 29.3(15) | 9.5(12)  | 2.2(13)  | -0.1(12) |
| O4   | 19.9(14) | 19.2(12) | 32.4(15) | 3.0(12)  | -1.3(13) | 2.4(12)  |
| O5   | 23.7(15) | 19.2(12) | 27.9(15) | 1.3(11)  | -1.4(13) | -5.1(12) |

| Atom | $U_{11}$ | $U_{22}$ | $U_{33}$ | $U_{23}$ | $U_{13}$ | $U_{12}$ |
|------|----------|----------|----------|----------|----------|----------|
| O6   | 25.0(14) | 14.9(12) | 28.5(15) | 5.5(11)  | -0.1(13) | 1.4(11)  |
| O7   | 24.5(15) | 17.8(13) | 34.3(15) | 7.0(12)  | -0.9(13) | -4.1(12) |
| O8   | 21.4(15) | 27.0(14) | 35.8(16) | 5.7(13)  | -3.9(13) | 1.5(13)  |
| N1   | 21.1(17) | 17.8(14) | 18.9(15) | 0.2(13)  | -1.2(14) | 0.2(13)  |
| N2   | 37(2)    | 14.6(14) | 26.1(17) | 1.9(13)  | 7.4(16)  | -1.7(15) |
| N3   | 37(2)    | 14.6(14) | 29.7(18) | 1.7(14)  | 9.0(17)  | 2.6(15)  |
| N4   | 21.6(16) | 17.2(14) | 17.1(15) | 1.7(12)  | 1.6(14)  | 0.9(14)  |
| N5   | 20.5(16) | 14.8(14) | 26.1(17) | 3.4(13)  | -1.1(14) | 1.1(13)  |
| N6   | 21.0(17) | 17.4(14) | 22.4(15) | -1.3(13) | -1.0(14) | 1.1(13)  |
| N7   | 37(2)    | 16.9(15) | 25.3(17) | 0.7(14)  | 4.4(16)  | 2.3(15)  |
| N8   | 35(2)    | 17.4(14) | 28.7(18) | -0.9(15) | 2.2(17)  | 1.9(15)  |
| N9   | 22.3(17) | 13.5(14) | 25.4(17) | 1.2(13)  | 0.9(14)  | -2.1(13) |
| N10  | 19.2(17) | 17.6(14) | 25.7(17) | -1.3(13) | -1.0(14) | -1.7(14) |
| C1   | 18.2(19) | 16.7(17) | 24.3(19) | 2.4(15)  | 1.4(16)  | 1.0(16)  |
| C2   | 19.1(19) | 18.2(16) | 23.6(18) | -1.8(15) | 0.9(17)  | 0.5(15)  |
| C3   | 17.5(18) | 18.3(16) | 23.9(19) | -0.2(15) | -2.8(16) | 1.8(15)  |
| C4   | 24(2)    | 17.5(17) | 26(2)    | 2.5(16)  | 2.2(17)  | -0.8(16) |
| C5   | 27(2)    | 21.8(18) | 24(2)    | 1.5(16)  | -0.3(18) | 0.1(18)  |
| C6   | 39(2)    | 16.7(18) | 30(2)    | 4.2(17)  | 7.8(19)  | 0.0(18)  |
| C7   | 19.2(19) | 17.6(16) | 22.6(18) | 3.1(15)  | -0.6(16) | -1.5(16) |
| C8   | 18.1(19) | 15.5(15) | 23.7(18) | 0.1(15)  | -0.8(16) | 0.3(15)  |
| C9   | 19.1(18) | 16.8(16) | 23.6(18) | -0.9(15) | -2.8(16) | 0.3(15)  |
| C10  | 21.9(19) | 16.6(17) | 25.4(19) | 2.0(16)  | -1.1(17) | -1.2(15) |
| C11  | 35(2)    | 19.9(19) | 29(2)    | 5.0(18)  | -0.9(18) | 2.3(18)  |
| C31  | 33(2)    | 24.9(19) | 27(2)    | 0.6(17)  | 1.4(19)  | 0.4(19)  |

**Table S11:** Bond Lengths in Å for **5 (Form ii)**.

| Atom | Atom            | Length/Å  |
|------|-----------------|-----------|
| K1   | K1 <sup>1</sup> | 4.4754(7) |
| K1   | O1              | 2.718(3)  |
| K1   | O1 <sup>1</sup> | 2.929(3)  |
| K1   | O2 <sup>1</sup> | 2.836(3)  |
| K1   | O3              | 2.718(3)  |
| K1   | O3 <sup>2</sup> | 2.782(3)  |
| K1   | O4 <sup>2</sup> | 2.903(3)  |
| K1   | O5              | 2.844(3)  |
| K1   | N4 <sup>1</sup> | 3.241(4)  |
| K1   | N5 <sup>2</sup> | 3.225(4)  |
| K1   | N7 <sup>2</sup> | 3.046(4)  |
| K1   | N8 <sup>2</sup> | 2.859(4)  |
| K2   | K2 <sup>3</sup> | 4.5565(7) |
| K2   | O4 <sup>4</sup> | 2.887(3)  |
| K2   | O5 <sup>3</sup> | 2.886(3)  |
| K2   | O6 <sup>3</sup> | 2.832(3)  |
| K2   | O6              | 2.747(3)  |
| K2   | O7              | 2.698(3)  |

| Atom | Atom             | Length/Å |
|------|------------------|----------|
| K2   | O7 <sup>5</sup>  | 2.838(3) |
| K2   | O8 <sup>5</sup>  | 3.011(3) |
| K2   | N2 <sup>4</sup>  | 3.019(4) |
| K2   | N3 <sup>1</sup>  | 3.303(4) |
| K2   | N9 <sup>3</sup>  | 3.224(4) |
| K2   | N10 <sup>5</sup> | 3.244(4) |
| O1   | N4               | 1.247(4) |
| O2   | N4               | 1.244(5) |
| O3   | N5               | 1.244(4) |
| O4   | N5               | 1.268(5) |
| O5   | N9               | 1.269(5) |
| O6   | N9               | 1.242(4) |
| O7   | N10              | 1.249(5) |
| O8   | N10              | 1.254(5) |
| N1   | C2               | 1.355(5) |
| N1   | C3               | 1.324(5) |
| N2   | N3               | 1.346(5) |
| N2   | C2               | 1.323(5) |
| N3   | C4               | 1.326(6) |
| N4   | C1               | 1.395(5) |
| N5   | C1               | 1.369(5) |
| N6   | C8               | 1.347(6) |
| N6   | C9               | 1.326(5) |
| N7   | N8               | 1.349(5) |
| N7   | C8               | 1.321(5) |
| N8   | C10              | 1.321(6) |
| N9   | C7               | 1.374(6) |
| N10  | C7               | 1.379(5) |
| C1   | C2               | 1.482(5) |
| C3   | C4               | 1.429(6) |
| C3   | C5               | 1.483(6) |
| C4   | C6               | 1.504(6) |
| C7   | C8               | 1.483(5) |
| C9   | C10              | 1.429(5) |
| C9   | C31              | 1.486(6) |
| C10  | C11              | 1.496(5) |

—<sup>1</sup>-1/2+x,3/2-y,1-z; <sup>2</sup>1/2+x,3/2-y,1-z; <sup>3</sup>-1/2+x,1/2-y,1-z; <sup>4</sup>+x,-1+y,+z; <sup>5</sup>1/2+x,1/2-y,1-z

**Table S12:** Bond Angles in ° for **5 (Form ii)**.

| Atom            | Atom | Atom            | Angle/°    |
|-----------------|------|-----------------|------------|
| O1              | K1   | K1 <sup>1</sup> | 90.91(7)   |
| O1 <sup>1</sup> | K1   | K1 <sup>1</sup> | 35.95(6)   |
| O1              | K1   | O1 <sup>1</sup> | 125.85(8)  |
| O1              | K1   | O2 <sup>1</sup> | 168.17(10) |
| O1              | K1   | O3 <sup>2</sup> | 70.06(9)   |
| O1              | K1   | O3              | 58.30(9)   |

| Atom            | Atom | Atom            | Angle <sup>o</sup> |
|-----------------|------|-----------------|--------------------|
| O1              | K1   | O4 <sup>2</sup> | 114.36(9)          |
| O1              | K1   | O5              | 104.92(9)          |
| O1              | K1   | N4 <sup>1</sup> | 146.46(9)          |
| O1 <sup>1</sup> | K1   | N4 <sup>1</sup> | 22.59(8)           |
| O1 <sup>1</sup> | K1   | N5 <sup>2</sup> | 139.89(9)          |
| O1              | K1   | N5 <sup>2</sup> | 92.43(9)           |
| O1              | K1   | N7 <sup>2</sup> | 68.33(10)          |
| O1 <sup>1</sup> | K1   | N7 <sup>2</sup> | 100.94(10)         |
| O1              | K1   | N8 <sup>2</sup> | 90.60(11)          |
| O2 <sup>1</sup> | K1   | K1 <sup>1</sup> | 78.03(6)           |
| O2 <sup>1</sup> | K1   | O1 <sup>1</sup> | 44.13(8)           |
| O2 <sup>1</sup> | K1   | O4 <sup>2</sup> | 76.49(9)           |
| O2 <sup>1</sup> | K1   | O5              | 73.71(9)           |
| O2 <sup>1</sup> | K1   | N4 <sup>1</sup> | 22.37(8)           |
| O2 <sup>1</sup> | K1   | N5 <sup>2</sup> | 98.89(9)           |
| O2 <sup>1</sup> | K1   | N7 <sup>2</sup> | 116.70(10)         |
| O2 <sup>1</sup> | K1   | N8 <sup>2</sup> | 97.23(11)          |
| O3 <sup>2</sup> | K1   | K1 <sup>1</sup> | 160.44(7)          |
| O3              | K1   | K1 <sup>1</sup> | 36.02(7)           |
| O3              | K1   | O1 <sup>1</sup> | 67.88(9)           |
| O3 <sup>2</sup> | K1   | O1 <sup>1</sup> | 160.06(9)          |
| O3              | K1   | O2 <sup>1</sup> | 111.98(9)          |
| O3 <sup>2</sup> | K1   | O2 <sup>1</sup> | 121.27(9)          |
| O3              | K1   | O3 <sup>2</sup> | 124.67(8)          |
| O3 <sup>2</sup> | K1   | O4 <sup>2</sup> | 45.06(9)           |
| O3              | K1   | O4 <sup>2</sup> | 166.92(9)          |
| O3              | K1   | O5              | 121.72(10)         |
| O3 <sup>2</sup> | K1   | O5              | 88.15(9)           |
| O3              | K1   | N4 <sup>1</sup> | 89.91(9)           |
| O3 <sup>2</sup> | K1   | N4 <sup>1</sup> | 143.47(9)          |
| O3 <sup>2</sup> | K1   | N5 <sup>2</sup> | 22.38(9)           |
| O3              | K1   | N5 <sup>2</sup> | 145.25(9)          |
| O3 <sup>2</sup> | K1   | N7 <sup>2</sup> | 72.40(10)          |
| O3              | K1   | N7 <sup>2</sup> | 71.39(10)          |
| O3              | K1   | N8 <sup>2</sup> | 94.56(10)          |
| O3 <sup>2</sup> | K1   | N8 <sup>2</sup> | 66.13(11)          |
| O4 <sup>2</sup> | K1   | K1 <sup>1</sup> | 154.45(7)          |
| O4 <sup>2</sup> | K1   | O1 <sup>1</sup> | 119.58(9)          |
| O4 <sup>2</sup> | K1   | N4 <sup>1</sup> | 98.85(9)           |
| O4 <sup>2</sup> | K1   | N5 <sup>2</sup> | 23.13(8)           |
| O4 <sup>2</sup> | K1   | N7 <sup>2</sup> | 96.04(10)          |
| O5              | K1   | K1 <sup>1</sup> | 101.54(7)          |
| O5              | K1   | O1 <sup>1</sup> | 97.66(9)           |
| O5              | K1   | O4 <sup>2</sup> | 69.53(9)           |
| O5              | K1   | N4 <sup>1</sup> | 81.70(9)           |
| O5              | K1   | N5 <sup>2</sup> | 81.21(9)           |
| O5              | K1   | N7 <sup>2</sup> | 160.54(11)         |

| Atom            | Atom | Atom             | Angle <sup>o</sup> |
|-----------------|------|------------------|--------------------|
| O5              | K1   | N8 <sup>2</sup>  | 143.56(10)         |
| N4 <sup>1</sup> | K1   | K1 <sup>1</sup>  | 55.68(6)           |
| N5 <sup>2</sup> | K1   | K1 <sup>1</sup>  | 174.98(8)          |
| N5 <sup>2</sup> | K1   | N4 <sup>1</sup>  | 121.10(9)          |
| N7 <sup>2</sup> | K1   | K1 <sup>1</sup>  | 96.88(8)           |
| N7 <sup>2</sup> | K1   | N4 <sup>1</sup>  | 114.31(10)         |
| N7 <sup>2</sup> | K1   | N5 <sup>2</sup>  | 80.89(10)          |
| N8 <sup>2</sup> | K1   | K1 <sup>1</sup>  | 111.12(9)          |
| N8 <sup>2</sup> | K1   | O1 <sup>1</sup>  | 99.40(11)          |
| N8 <sup>2</sup> | K1   | O4 <sup>2</sup>  | 74.05(10)          |
| N8 <sup>2</sup> | K1   | N4 <sup>1</sup>  | 103.38(11)         |
| N8 <sup>2</sup> | K1   | N5 <sup>2</sup>  | 65.11(10)          |
| N8 <sup>2</sup> | K1   | N7 <sup>2</sup>  | 26.17(10)          |
| O4 <sup>3</sup> | K2   | K2 <sup>4</sup>  | 111.48(7)          |
| O4 <sup>3</sup> | K2   | O8 <sup>5</sup>  | 87.44(9)           |
| O4 <sup>3</sup> | K2   | N2 <sup>3</sup>  | 58.69(9)           |
| O4 <sup>3</sup> | K2   | N3 <sup>1</sup>  | 139.97(9)          |
| O4 <sup>3</sup> | K2   | N9 <sup>4</sup>  | 81.50(9)           |
| O4 <sup>3</sup> | K2   | N10 <sup>5</sup> | 88.58(9)           |
| O5 <sup>4</sup> | K2   | K2 <sup>4</sup>  | 78.49(6)           |
| O5 <sup>4</sup> | K2   | O4 <sup>3</sup>  | 69.18(8)           |
| O5 <sup>4</sup> | K2   | O8 <sup>5</sup>  | 81.23(9)           |
| O5 <sup>4</sup> | K2   | N2 <sup>3</sup>  | 127.71(9)          |
| O5 <sup>4</sup> | K2   | N3 <sup>1</sup>  | 71.17(9)           |
| O5 <sup>4</sup> | K2   | N9 <sup>4</sup>  | 23.13(8)           |
| O5 <sup>4</sup> | K2   | N10 <sup>5</sup> | 102.84(9)          |
| O6              | K2   | K2 <sup>4</sup>  | 85.91(7)           |
| O6 <sup>4</sup> | K2   | K2 <sup>4</sup>  | 34.63(5)           |
| O6              | K2   | O4 <sup>3</sup>  | 127.58(9)          |
| O6 <sup>4</sup> | K2   | O4 <sup>3</sup>  | 87.67(9)           |
| O6              | K2   | O5 <sup>4</sup>  | 160.98(9)          |
| O6 <sup>4</sup> | K2   | O5 <sup>4</sup>  | 44.90(8)           |
| O6              | K2   | O6 <sup>4</sup>  | 120.53(7)          |
| O6 <sup>4</sup> | K2   | O7 <sup>5</sup>  | 162.99(10)         |
| O6              | K2   | O7 <sup>5</sup>  | 65.35(9)           |
| O6 <sup>4</sup> | K2   | O8 <sup>5</sup>  | 123.42(9)          |
| O6              | K2   | O8 <sup>5</sup>  | 106.39(9)          |
| O6 <sup>4</sup> | K2   | N2 <sup>3</sup>  | 130.81(10)         |
| O6              | K2   | N2 <sup>3</sup>  | 70.23(9)           |
| O6 <sup>4</sup> | K2   | N3 <sup>1</sup>  | 59.81(9)           |
| O6              | K2   | N3 <sup>1</sup>  | 90.92(9)           |
| O6              | K2   | N9 <sup>4</sup>  | 139.85(9)          |
| O6 <sup>4</sup> | K2   | N9 <sup>4</sup>  | 22.48(8)           |
| O6 <sup>4</sup> | K2   | N10 <sup>5</sup> | 146.13(9)          |
| O6              | K2   | N10 <sup>5</sup> | 87.75(9)           |
| O7 <sup>5</sup> | K2   | K2 <sup>4</sup>  | 145.89(7)          |
| O7              | K2   | K2 <sup>4</sup>  | 35.60(7)           |

| Atom             | Atom | Atom             | Angle <sup>o</sup> |
|------------------|------|------------------|--------------------|
| O7               | K2   | O4 <sup>3</sup>  | 109.05(10)         |
| O7 <sup>5</sup>  | K2   | O4 <sup>3</sup>  | 100.90(9)          |
| O7               | K2   | O5 <sup>4</sup>  | 110.78(9)          |
| O7 <sup>5</sup>  | K2   | O5 <sup>4</sup>  | 124.72(9)          |
| O7               | K2   | O6 <sup>4</sup>  | 66.06(9)           |
| O7               | K2   | O6               | 58.12(9)           |
| O7               | K2   | O7 <sup>5</sup>  | 123.29(7)          |
| O7               | K2   | O8 <sup>5</sup>  | 162.04(10)         |
| O7 <sup>5</sup>  | K2   | O8 <sup>5</sup>  | 43.51(8)           |
| O7               | K2   | N2 <sup>3</sup>  | 90.54(10)          |
| O7 <sup>5</sup>  | K2   | N2 <sup>3</sup>  | 65.70(10)          |
| O7               | K2   | N3 <sup>1</sup>  | 80.16(10)          |
| O7 <sup>5</sup>  | K2   | N3 <sup>1</sup>  | 105.82(10)         |
| O7               | K2   | N9 <sup>4</sup>  | 88.46(9)           |
| O7 <sup>5</sup>  | K2   | N9 <sup>4</sup>  | 143.94(9)          |
| O7 <sup>5</sup>  | K2   | N10 <sup>5</sup> | 22.45(9)           |
| O7               | K2   | N10 <sup>5</sup> | 145.74(9)          |
| O8 <sup>5</sup>  | K2   | K2 <sup>4</sup>  | 144.66(7)          |
| O8 <sup>5</sup>  | K2   | N2 <sup>3</sup>  | 92.23(10)          |
| O8 <sup>5</sup>  | K2   | N3 <sup>1</sup>  | 91.83(9)           |
| O8 <sup>5</sup>  | K2   | N9 <sup>4</sup>  | 101.35(9)          |
| O8 <sup>5</sup>  | K2   | N10 <sup>5</sup> | 22.74(9)           |
| N2 <sup>3</sup>  | K2   | K2 <sup>4</sup>  | 123.04(8)          |
| N2 <sup>3</sup>  | K2   | N3 <sup>1</sup>  | 161.10(9)          |
| N2 <sup>3</sup>  | K2   | N9 <sup>4</sup>  | 137.32(10)         |
| N2 <sup>3</sup>  | K2   | N10 <sup>5</sup> | 73.46(10)          |
| N3 <sup>1</sup>  | K2   | K2 <sup>4</sup>  | 54.27(7)           |
| N9 <sup>4</sup>  | K2   | K2 <sup>4</sup>  | 55.36(6)           |
| N9 <sup>4</sup>  | K2   | N3 <sup>1</sup>  | 59.42(9)           |
| N9 <sup>4</sup>  | K2   | N10 <sup>5</sup> | 123.91(9)          |
| N10 <sup>5</sup> | K2   | K2 <sup>4</sup>  | 158.49(7)          |
| N10 <sup>5</sup> | K2   | N3 <sup>1</sup>  | 105.38(9)          |
| K1               | O1   | K1 <sup>2</sup>  | 104.80(10)         |
| N4               | O1   | K1               | 140.6(3)           |
| N4               | O1   | K1 <sup>2</sup>  | 92.9(2)            |
| N4               | O2   | K1 <sup>2</sup>  | 97.4(2)            |
| K1               | O3   | K1 <sup>1</sup>  | 108.92(10)         |
| N5               | O3   | K1               | 144.9(3)           |
| N5               | O3   | K1 <sup>1</sup>  | 99.3(2)            |
| K2 <sup>6</sup>  | O4   | K1 <sup>1</sup>  | 109.68(11)         |
| N5               | O4   | K1 <sup>1</sup>  | 92.8(2)            |
| N5               | O4   | K2 <sup>6</sup>  | 111.2(2)           |
| K1               | O5   | K2 <sup>5</sup>  | 111.40(11)         |
| N9               | O5   | K1               | 118.7(2)           |
| N9               | O5   | K2 <sup>5</sup>  | 93.5(2)            |
| K2               | O6   | K2 <sup>5</sup>  | 109.51(9)          |
| N9               | O6   | K2 <sup>5</sup>  | 96.8(2)            |



| Atom | Atom | Atom            | Angle/°    |
|------|------|-----------------|------------|
| N9   | O6   | K2              | 141.9(2)   |
| K2   | O7   | K2 <sup>4</sup> | 110.79(10) |
| N10  | O7   | K2              | 146.4(3)   |
| N10  | O7   | K2 <sup>4</sup> | 97.4(2)    |
| N10  | O8   | K2 <sup>4</sup> | 89.1(2)    |
| C3   | N1   | C2              | 116.2(3)   |
| N3   | N2   | K2 <sup>6</sup> | 112.9(3)   |
| C2   | N2   | K2 <sup>6</sup> | 125.2(3)   |
| C2   | N2   | N3              | 117.6(3)   |
| N2   | N3   | K2 <sup>2</sup> | 89.0(3)    |
| C4   | N3   | K2 <sup>2</sup> | 120.3(3)   |
| C4   | N3   | N2              | 119.8(3)   |
| O1   | N4   | K1 <sup>2</sup> | 64.5(2)    |
| O1   | N4   | C1              | 122.8(4)   |
| O2   | N4   | K1 <sup>2</sup> | 60.19(19)  |
| O2   | N4   | O1              | 120.9(4)   |
| O2   | N4   | C1              | 116.3(3)   |
| C1   | N4   | K1 <sup>2</sup> | 160.9(3)   |
| O3   | N5   | K1 <sup>1</sup> | 58.4(2)    |
| O3   | N5   | O4              | 120.5(3)   |
| O3   | N5   | C1              | 122.8(3)   |
| O4   | N5   | K1 <sup>1</sup> | 64.0(2)    |
| O4   | N5   | C1              | 116.6(3)   |
| C1   | N5   | K1 <sup>1</sup> | 168.1(3)   |
| C9   | N6   | C8              | 116.2(4)   |
| N8   | N7   | K1 <sup>1</sup> | 69.2(2)    |
| C8   | N7   | K1 <sup>1</sup> | 172.3(3)   |
| C8   | N7   | N8              | 117.7(4)   |
| N7   | N8   | K1 <sup>1</sup> | 84.7(2)    |
| C10  | N8   | K1 <sup>1</sup> | 155.5(3)   |
| C10  | N8   | N7              | 119.7(4)   |
| O5   | N9   | K2 <sup>5</sup> | 63.3(2)    |
| O5   | N9   | C7              | 114.9(3)   |
| O6   | N9   | K2 <sup>5</sup> | 60.7(2)    |
| O6   | N9   | O5              | 120.9(3)   |
| O6   | N9   | C7              | 124.1(3)   |
| C7   | N9   | K2 <sup>5</sup> | 162.7(3)   |
| O7   | N10  | K2 <sup>4</sup> | 60.2(2)    |
| O7   | N10  | O8              | 120.5(4)   |
| O7   | N10  | C7              | 123.0(4)   |
| O8   | N10  | K2 <sup>4</sup> | 68.1(2)    |
| O8   | N10  | C7              | 116.5(3)   |
| C7   | N10  | K2 <sup>4</sup> | 152.4(3)   |
| N4   | C1   | C2              | 116.9(4)   |
| N5   | C1   | N4              | 121.4(3)   |
| N5   | C1   | C2              | 121.7(4)   |
| N1   | C2   | C1              | 115.6(3)   |

| Atom | Atom | Atom | Angle/°  |
|------|------|------|----------|
| N2   | C2   | N1   | 126.4(4) |
| N2   | C2   | C1   | 118.1(4) |
| N1   | C3   | C4   | 119.1(4) |
| N1   | C3   | C5   | 118.8(4) |
| C4   | C3   | C5   | 122.1(4) |
| N3   | C4   | C3   | 120.9(4) |
| N3   | C4   | C6   | 116.8(4) |
| C3   | C4   | C6   | 122.3(4) |
| N9   | C7   | N10  | 122.8(3) |
| N9   | C7   | C8   | 118.3(4) |
| N10  | C7   | C8   | 118.9(4) |
| N6   | C8   | C7   | 117.0(3) |
| N7   | C8   | N6   | 126.5(4) |
| N7   | C8   | C7   | 116.5(4) |
| N6   | C9   | C10  | 119.2(4) |
| N6   | C9   | C31  | 118.7(4) |
| C10  | C9   | C31  | 122.1(4) |
| N8   | C10  | C9   | 120.7(4) |
| N8   | C10  | C11  | 117.0(4) |
| C9   | C10  | C11  | 122.3(4) |

—<sup>1</sup>-1/2+x,3/2-y,1-z; <sup>2</sup>1/2+x,3/2-y,1-z; <sup>3</sup>+x,-1+y,+z; <sup>4</sup>-1/2+x,1/2-y,1-z; <sup>5</sup>1/2+x,1/2-y,1-z; <sup>6</sup>+x,1+y,+z

**Table S13:** Torsion Angles in ° for **5 (Form ii)**.

| Atom            | Atom | Atom | Atom            | Angle/°   |
|-----------------|------|------|-----------------|-----------|
| K1              | O1   | N4   | K1 <sup>1</sup> | 117.8(4)  |
| K1              | O1   | N4   | O2              | 139.6(4)  |
| K1 <sup>1</sup> | O1   | N4   | O2              | 21.8(4)   |
| K1 <sup>1</sup> | O1   | N4   | C1              | -159.7(3) |
| K1              | O1   | N4   | C1              | -42.0(6)  |
| K1 <sup>1</sup> | O2   | N4   | O1              | -22.7(4)  |
| K1 <sup>1</sup> | O2   | N4   | C1              | 158.7(3)  |
| K1              | O3   | N5   | K1 <sup>2</sup> | 143.4(5)  |
| K1 <sup>2</sup> | O3   | N5   | O4              | 16.5(4)   |
| K1              | O3   | N5   | O4              | 159.9(3)  |
| K1 <sup>2</sup> | O3   | N5   | C1              | -166.0(3) |
| K1              | O3   | N5   | C1              | -22.5(7)  |
| K1 <sup>2</sup> | O4   | N5   | O3              | -15.6(4)  |
| K1 <sup>2</sup> | O4   | N5   | C1              | 166.7(3)  |
| K1              | O5   | N9   | K2 <sup>3</sup> | -116.8(2) |
| K1              | O5   | N9   | O6              | -96.8(4)  |
| K1              | O5   | N9   | C7              | 82.3(4)   |
| K1 <sup>1</sup> | N4   | C1   | N5              | -85.6(8)  |
| K1 <sup>1</sup> | N4   | C1   | C2              | 94.1(8)   |
| K1 <sup>2</sup> | N5   | C1   | N4              | -86.0(13) |
| K1 <sup>2</sup> | N5   | C1   | C2              | 94.3(12)  |
| K1 <sup>2</sup> | N7   | N8   | C10             | -177.3(5) |

| Atom            | Atom | Atom | Atom            | Angle <sup>o</sup> |
|-----------------|------|------|-----------------|--------------------|
| K1 <sup>2</sup> | N8   | C10  | C9              | -171.3(5)          |
| K1 <sup>2</sup> | N8   | C10  | C11             | 8.7(10)            |
| K2 <sup>4</sup> | O4   | N5   | K1 <sup>2</sup> | 112.39(18)         |
| K2 <sup>4</sup> | O4   | N5   | O3              | 96.8(3)            |
| K2 <sup>4</sup> | O4   | N5   | C1              | -80.9(4)           |
| K2 <sup>3</sup> | O5   | N9   | O6              | 20.0(4)            |
| K2 <sup>3</sup> | O5   | N9   | C7              | -160.9(3)          |
| K2              | O6   | N9   | K2 <sup>3</sup> | -134.2(4)          |
| K2              | O6   | N9   | O5              | -154.8(3)          |
| K2 <sup>3</sup> | O6   | N9   | O5              | -20.5(4)           |
| K2              | O6   | N9   | C7              | 26.2(6)            |
| K2 <sup>3</sup> | O6   | N9   | C7              | 160.5(3)           |
| K2              | O7   | N10  | K2 <sup>5</sup> | -147.3(5)          |
| K2              | O7   | N10  | O8              | 179.5(3)           |
| K2 <sup>5</sup> | O7   | N10  | O8              | -33.2(4)           |
| K2              | O7   | N10  | C7              | 0.3(7)             |
| K2 <sup>5</sup> | O7   | N10  | C7              | 147.7(4)           |
| K2 <sup>5</sup> | O8   | N10  | O7              | 30.8(4)            |
| K2 <sup>5</sup> | O8   | N10  | C7              | -150.1(3)          |
| K2 <sup>4</sup> | N2   | N3   | K2 <sup>1</sup> | 77.55(19)          |
| K2 <sup>4</sup> | N2   | N3   | C4              | -157.6(4)          |
| K2 <sup>4</sup> | N2   | C2   | N1              | 151.9(3)           |
| K2 <sup>4</sup> | N2   | C2   | C1              | -28.6(6)           |
| K2 <sup>1</sup> | N3   | C4   | C3              | 110.0(4)           |
| K2 <sup>1</sup> | N3   | C4   | C6              | -68.7(5)           |
| K2 <sup>3</sup> | N9   | C7   | N10             | 96.6(9)            |
| K2 <sup>3</sup> | N9   | C7   | C8              | -81.8(9)           |
| K2 <sup>5</sup> | N10  | C7   | N9              | 80.5(7)            |
| K2 <sup>5</sup> | N10  | C7   | C8              | -101.2(6)          |
| O1              | N4   | C1   | N5              | 21.4(6)            |
| O1              | N4   | C1   | C2              | -158.9(4)          |
| O2              | N4   | C1   | N5              | -160.1(4)          |
| O2              | N4   | C1   | C2              | 19.6(5)            |
| O3              | N5   | C1   | N4              | 6.0(6)             |
| O3              | N5   | C1   | C2              | -173.7(4)          |
| O4              | N5   | C1   | N4              | -176.3(4)          |
| O4              | N5   | C1   | C2              | 4.0(6)             |
| O5              | N9   | C7   | N10             | 176.5(4)           |
| O5              | N9   | C7   | C8              | -1.9(5)            |
| O6              | N9   | C7   | N10             | -4.4(7)            |
| O6              | N9   | C7   | C8              | 177.2(4)           |
| O7              | N10  | C7   | N9              | -7.2(7)            |
| O7              | N10  | C7   | C8              | 171.1(4)           |
| O8              | N10  | C7   | N9              | 173.6(4)           |
| O8              | N10  | C7   | C8              | -8.0(6)            |
| N1              | C3   | C4   | N3              | -1.6(7)            |
| N1              | C3   | C4   | C6              | 177.0(4)           |

| Atom | Atom | Atom | Atom            | Angle <sup>o</sup> |
|------|------|------|-----------------|--------------------|
| N2   | N3   | C4   | C3              | 1.8(7)             |
| N2   | N3   | C4   | C6              | -176.8(4)          |
| N3   | N2   | C2   | N1              | -3.1(7)            |
| N3   | N2   | C2   | C1              | 176.4(4)           |
| N4   | C1   | C2   | N1              | 57.1(5)            |
| N4   | C1   | C2   | N2              | -122.4(4)          |
| N5   | C1   | C2   | N1              | -123.2(4)          |
| N5   | C1   | C2   | N2              | 57.3(6)            |
| N6   | C9   | C10  | N8              | -1.6(7)            |
| N6   | C9   | C10  | C11             | 178.4(4)           |
| N7   | N8   | C10  | C9              | 2.3(7)             |
| N7   | N8   | C10  | C11             | -177.8(4)          |
| N8   | N7   | C8   | N6              | -0.3(7)            |
| N8   | N7   | C8   | C7              | 178.7(4)           |
| N9   | C7   | C8   | N6              | 83.7(5)            |
| N9   | C7   | C8   | N7              | -95.5(5)           |
| N10  | C7   | C8   | N6              | -94.8(5)           |
| N10  | C7   | C8   | N7              | 86.1(5)            |
| C2   | N1   | C3   | C4              | -0.8(6)            |
| C2   | N1   | C3   | C5              | 179.6(4)           |
| C2   | N2   | N3   | K2 <sup>1</sup> | -124.5(4)          |
| C2   | N2   | N3   | C4              | 0.4(7)             |
| C3   | N1   | C2   | N2              | 3.2(7)             |
| C3   | N1   | C2   | C1              | -176.2(4)          |
| C5   | C3   | C4   | N3              | 178.0(4)           |
| C5   | C3   | C4   | C6              | -3.4(7)            |
| C8   | N6   | C9   | C10             | 0.0(6)             |
| C8   | N6   | C9   | C31             | -179.4(4)          |
| C8   | N7   | N8   | K1 <sup>2</sup> | 176.0(4)           |
| C8   | N7   | N8   | C10             | -1.3(6)            |
| C9   | N6   | C8   | N7              | 0.9(6)             |
| C9   | N6   | C8   | C7              | -178.1(4)          |
| C31  | C9   | C10  | N8              | 177.9(4)           |
| C31  | C9   | C10  | C11             | -2.1(7)            |

—<sup>1</sup>1/2+x,3/2-y,1-z; <sup>2</sup>-1/2+x,3/2-y,1-z; <sup>3</sup>1/2+x,1/2-y,1-z; <sup>4</sup>+x,1+y,+z; <sup>5</sup>-1/2+x,1/2-y,1-z

**Table S14:** Hydrogen Fractional Atomic Coordinates ( $\times 10^4$ ) and Equivalent Isotropic Displacement Parameters ( $\text{\AA}^2 \times 10^3$ ) for **5 (Form ii)**.  $U_{eq}$  is defined as 1/3 of the trace of the orthogonalised  $U_{ij}$ .

| Atom | x        | y        | z       | $U_{eq}$ |
|------|----------|----------|---------|----------|
| H5A  | 10102.36 | 10581.61 | 1776.71 | 37       |
| H5B  | 10507.8  | 11798.9  | 1781.91 | 37       |
| H5C  | 8703.74  | 11396.38 | 1527.21 | 37       |
| H6A  | 8298.65  | 13896.06 | 2822.09 | 43       |
| H6B  | 8255.16  | 13308.23 | 2073.96 | 43       |
| H6C  | 10004.24 | 13473.84 | 2477.19 | 43       |

| Atom | x       | y       | z       | $U_{eq}$ |
|------|---------|---------|---------|----------|
| H11A | 5141.4  | 8879.62 | 2881.68 | 42       |
| H11B | 4949.64 | 8289.02 | 2138.75 | 42       |
| H11C | 6775.29 | 8475.9  | 2470.79 | 42       |
| H31A | 7215.39 | 5625.76 | 1836.37 | 42       |
| H31B | 7529.92 | 6853.21 | 1846.87 | 42       |
| H31C | 5769.63 | 6401.31 | 1576.67 | 42       |

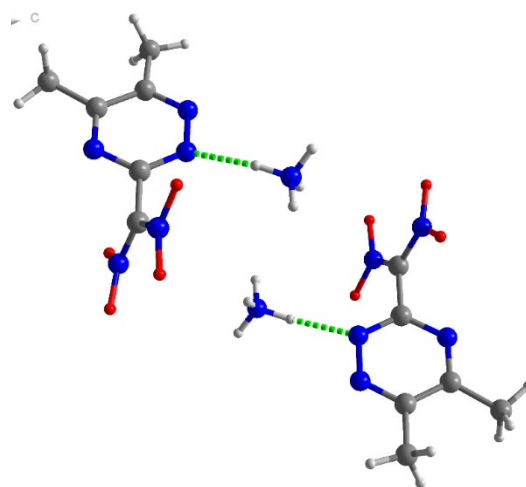

**Figure S6:** Thermal ellipsoids shown at 50% **5c**.

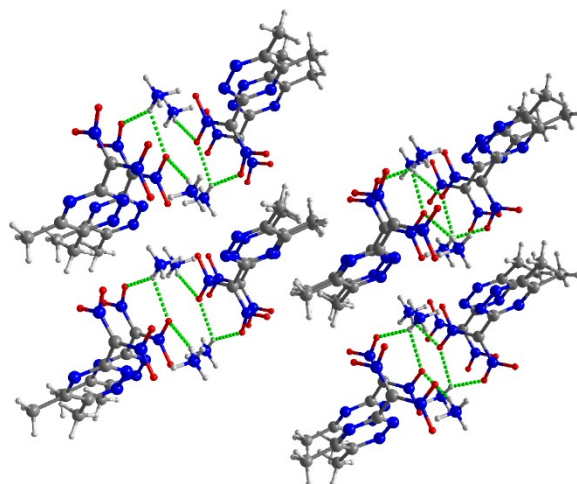

**Figure S7:** Ball-and-stick packing diagram of **5c** viewed up the a axis.

**Table S15:** Fractional Atomic Coordinates ( $\times 10^4$ ) and Equivalent Isotropic Displacement Parameters ( $\text{\AA}^2 \times 10^3$ ) for **5c**.  $U_{eq}$  is defined as 1/3 of the trace of the orthogonalised  $U_{ij}$ .

| Atom | x           | y          | z         | $U_{eq}$ |
|------|-------------|------------|-----------|----------|
| O1   | 357.1(17)   | 5721.6(13) | 7272.6(8) | 27.7(2)  |
| O2   | -2414.0(16) | 4278.5(13) | 8327.8(8) | 23.8(2)  |

| Atom | x           | y           | z           | $U_{eq}$ |
|------|-------------|-------------|-------------|----------|
| O3   | 2233.1(14)  | 4214.0(11)  | 5485.6(7)   | 18.0(2)  |
| O4   | 1292.4(14)  | 1436.8(12)  | 5505.0(8)   | 19.8(2)  |
| N1   | -3288.7(17) | 1005.5(14)  | 6790.9(9)   | 17.6(2)  |
| N2   | -4730.4(16) | -301.2(14)  | 7272.8(9)   | 17.0(2)  |
| N3   | -1436.1(16) | 275.2(13)   | 8503.4(8)   | 14.9(2)  |
| N4   | -800.2(17)  | 4369.2(14)  | 7518.1(9)   | 17.2(2)  |
| N5   | 1097.1(16)  | 2865.6(13)  | 5948.8(8)   | 14.4(2)  |
| C1   | -1793.5(19) | 1288.6(16)  | 7435.0(10)  | 15.0(2)  |
| C2   | -4595.1(18) | -1260.9(16) | 8350.4(10)  | 14.5(2)  |
| C3   | -2814.6(18) | -1033.5(15) | 8966.9(10)  | 14.1(2)  |
| C4   | -409.4(19)  | 2875.2(16)  | 6944.8(10)  | 15.3(2)  |
| C5   | -6358.2(19) | -2565.1(17) | 8878.7(11)  | 17.8(2)  |
| C6   | -2429.3(19) | -2265.2(16) | 10122.3(10) | 17.9(2)  |
| N6   | 3704.7(17)  | 7622.8(14)  | 5668.7(9)   | 15.5(2)  |

**Table S16:** Anisotropic Displacement Parameters ( $\times 10^4$ ) for **5c**. The anisotropic displacement factor exponent takes the form:  $-2\pi^2[h^2a^{*2} \times U_{11} + \dots + 2hka^* \times b^* \times U_{12}]$

| Atom | $U_{11}$ | $U_{22}$ | $U_{33}$ | $U_{23}$ | $U_{13}$ | $U_{12}$ |
|------|----------|----------|----------|----------|----------|----------|
| O1   | 36.1(5)  | 24.1(5)  | 26.5(5)  | -12.2(4) | 10.9(4)  | -19.9(4) |
| O2   | 25.7(4)  | 21.8(4)  | 22.5(5)  | -7.3(4)  | 10.3(4)  | -7.5(3)  |
| O3   | 19.0(4)  | 15.6(4)  | 18.9(4)  | -2.8(3)  | 3.2(3)   | -7.5(3)  |
| O4   | 25.0(4)  | 15.8(4)  | 20.6(4)  | -8.3(3)  | 0.7(3)   | -5.0(3)  |
| N1   | 19.4(5)  | 19.0(5)  | 15.4(5)  | -2.3(4)  | -2.6(4)  | -7.1(4)  |
| N2   | 18.7(5)  | 18.1(5)  | 15.4(5)  | -2.8(4)  | -2.3(4)  | -6.6(4)  |
| N3   | 16.7(4)  | 14.6(5)  | 13.8(5)  | -2.7(4)  | -1.3(3)  | -3.7(4)  |
| N4   | 20.3(5)  | 16.0(5)  | 15.2(5)  | -3.0(4)  | 1.3(4)   | -6.0(4)  |
| N5   | 15.9(4)  | 13.3(4)  | 14.3(5)  | -2.1(3)  | -2.2(4)  | -3.1(3)  |
| C1   | 16.5(5)  | 14.7(5)  | 13.9(5)  | -2.9(4)  | -0.2(4)  | -3.3(4)  |
| C2   | 15.5(5)  | 13.5(5)  | 15.1(5)  | -4.4(4)  | -0.8(4)  | -2.4(4)  |
| C3   | 14.8(5)  | 12.4(5)  | 15.3(5)  | -4.5(4)  | -0.1(4)  | -1.8(4)  |
| C4   | 17.7(5)  | 14.7(5)  | 14.2(5)  | -3.6(4)  | -0.7(4)  | -4.7(4)  |
| C5   | 15.8(5)  | 18.8(5)  | 19.5(6)  | -3.5(4)  | -0.9(4)  | -6.6(4)  |
| C6   | 18.7(5)  | 18.4(5)  | 16.6(6)  | 0.2(4)   | -4.0(4)  | -5.7(4)  |
| N6   | 18.7(5)  | 14.6(5)  | 14.1(5)  | -3.6(4)  | 0.4(4)   | -6.1(4)  |

**Table S17:** Bond Lengths in Å for **5c**.

| Atom | Atom | Length/Å   |
|------|------|------------|
| O1   | N4   | 1.2446(13) |
| O2   | N4   | 1.2507(13) |
| O3   | N5   | 1.2545(12) |
| O4   | N5   | 1.2559(13) |
| N1   | N2   | 1.3513(13) |
| N1   | C1   | 1.3241(15) |
| N2   | C2   | 1.3233(15) |
| N3   | C1   | 1.3497(15) |

| Atom | Atom | Length/Å   |
|------|------|------------|
| N3   | C3   | 1.3235(14) |
| N4   | C4   | 1.3870(15) |
| N5   | C4   | 1.3728(15) |
| C1   | C4   | 1.4829(15) |
| C2   | C3   | 1.4253(15) |
| C2   | C5   | 1.4944(15) |
| C3   | C6   | 1.4942(15) |

**Table S18:** Bond Angles in ° for **5c**.

| Atom | Atom | Atom | Angle/°    |
|------|------|------|------------|
| C1   | N1   | N2   | 117.82(10) |
| C2   | N2   | N1   | 119.80(9)  |
| C3   | N3   | C1   | 116.25(9)  |
| O1   | N4   | O2   | 120.70(10) |
| O1   | N4   | C4   | 123.79(10) |
| O2   | N4   | C4   | 115.51(9)  |
| O3   | N5   | O4   | 120.57(9)  |
| O3   | N5   | C4   | 122.43(10) |
| O4   | N5   | C4   | 117.00(9)  |
| N1   | C1   | N3   | 125.80(10) |
| N1   | C1   | C4   | 117.07(10) |
| N3   | C1   | C4   | 117.13(9)  |
| N2   | C2   | C3   | 120.14(10) |
| N2   | C2   | C5   | 117.63(10) |
| C3   | C2   | C5   | 122.23(10) |
| N3   | C3   | C2   | 119.69(10) |
| N3   | C3   | C6   | 118.71(10) |
| C2   | C3   | C6   | 121.59(10) |
| N4   | C4   | C1   | 116.37(10) |
| N5   | C4   | N4   | 122.90(10) |
| N5   | C4   | C1   | 120.68(10) |

**Table S19:** Torsion Angles in ° for **5c**.

| Atom | Atom | Atom | Atom | Angle/°     |
|------|------|------|------|-------------|
| O1   | N4   | C4   | N5   | -9.02(18)   |
| O1   | N4   | C4   | C1   | 173.62(10)  |
| O2   | N4   | C4   | N5   | 171.62(10)  |
| O2   | N4   | C4   | C1   | -5.74(15)   |
| O3   | N5   | C4   | N4   | 0.06(17)    |
| O3   | N5   | C4   | C1   | 177.30(9)   |
| O4   | N5   | C4   | N4   | -179.53(10) |
| O4   | N5   | C4   | C1   | -2.28(15)   |
| N1   | N2   | C2   | C3   | -5.26(16)   |
| N1   | N2   | C2   | C5   | 174.72(10)  |
| N1   | C1   | C4   | N4   | 113.45(12)  |

| Atom | Atom | Atom | Atom | Angle/ $^{\circ}$ |
|------|------|------|------|-------------------|
| N1   | C1   | C4   | N5   | -63.97(14)        |
| N2   | N1   | C1   | N3   | 6.08(17)          |
| N2   | N1   | C1   | C4   | -173.11(10)       |
| N2   | C2   | C3   | N3   | 6.72(16)          |
| N2   | C2   | C3   | C6   | -172.13(10)       |
| N3   | C1   | C4   | N4   | -65.81(14)        |
| N3   | C1   | C4   | N5   | 116.77(12)        |
| C1   | N1   | N2   | C2   | -0.77(16)         |
| C1   | N3   | C3   | C2   | -1.88(15)         |
| C1   | N3   | C3   | C6   | 177.00(10)        |
| C3   | N3   | C1   | N1   | -4.58(17)         |
| C3   | N3   | C1   | C4   | 174.61(9)         |
| C5   | C2   | C3   | N3   | -173.27(10)       |
| C5   | C2   | C3   | C6   | 7.88(17)          |

**Table S20:** Hydrogen Fractional Atomic Coordinates ( $\times 10^4$ ) and Equivalent Isotropic Displacement Parameters ( $\text{\AA}^2 \times 10^3$ ) for **5c**.  $U_{eq}$  is defined as 1/3 of the trace of the orthogonalised  $U_{ij}$ .

| Atom | x        | y        | z        | $U_{eq}$ |
|------|----------|----------|----------|----------|
| H5A  | -7197.06 | -2181.22 | 9580.53  | 27       |
| H5B  | -5611.31 | -3854.98 | 9085.66  | 27       |
| H5C  | -7422.48 | -2514.2  | 8316.44  | 27       |
| H6A  | -3893.85 | -2380.17 | 10618.73 | 27       |
| H6B  | -1416.05 | -1706.22 | 10494.58 | 27       |
| H6C  | -1725.28 | -3516.99 | 10011.51 | 27       |
| H6D  | 3820(30) | 8510(20) | 6074(15) | 26(4)    |
| H6E  | 2770(30) | 6750(20) | 6023(15) | 27(4)    |
| H6F  | 3270(30) | 8230(30) | 4931(17) | 33(4)    |
| H6G  | 5100(40) | 7030(30) | 5503(17) | 36(5)    |

**Table S21:** Hydrogen Bond information for **5c**.

| D  | H   | A  | d(D-H)/ $\text{\AA}$ | d(H-A)/ $\text{\AA}$ | d(D-A)/ $\text{\AA}$ | D-H-A/deg |
|----|-----|----|----------------------|----------------------|----------------------|-----------|
| N6 | H6E | O1 | 0.900(18)            | 2.000(18)            | 2.8312(13)           | 152.8(16) |
| N6 | H6E | O3 | 0.900(18)            | 2.171(17)            | 2.8242(12)           | 128.9(15) |



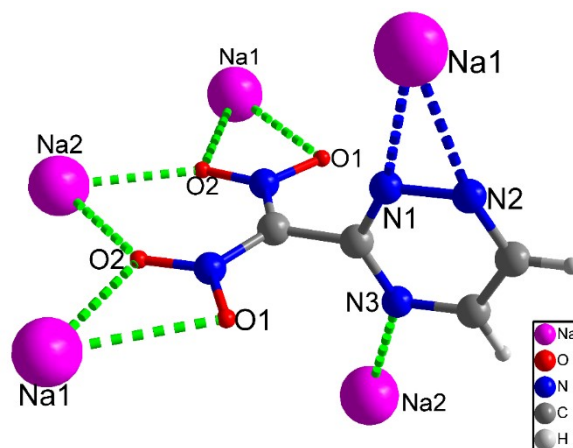

**Figure S8:** Thermal ellipsoids shown at 50% **5e**.

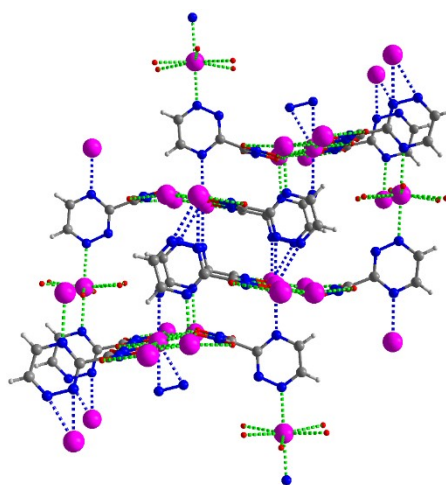

**Figure S9:** Ball-and-stick packing diagram of **5e** viewed up the b axis.

**Table S22:** Fractional Atomic Coordinates ( $\times 10^4$ ) and Equivalent Isotropic Displacement Parameters ( $\text{\AA}^2 \times 10^3$ ) for **5e**.  $U_{eq}$  is defined as 1/3 of the trace of the orthogonalised  $U_{ij}$ .

| Atom | x           | y          | z          | $U_{eq}$  |
|------|-------------|------------|------------|-----------|
| Na1  | 6599.1(6)   | 7500       | 6525.9(4)  | 15.87(18) |
| Na2  | 11948.0(6)  | 7500       | 3343.7(4)  | 15.67(18) |
| O1   | 4741.0(8)   | 5473.5(12) | 6278.8(6)  | 21.1(2)   |
| O2   | 6299.4(7)   | 4243.1(12) | 6499.7(6)  | 19.6(2)   |
| O3   | 8234.2(7)   | 5741.5(12) | 6880.8(6)  | 16.0(2)   |
| O4   | 9766.2(7)   | 4528.2(12) | 6549.7(6)  | 19.5(2)   |
| N1   | 3385.5(13)  | 2500       | 5188.3(10) | 18.8(3)   |
| N2   | 2332.8(13)  | 2500       | 4967.1(10) | 20.8(3)   |
| N3   | 2936.3(12)  | 2500       | 6709.7(9)  | 15.0(3)   |
| N4   | 5314.3(8)   | 4105.8(14) | 6345.8(7)  | 15.2(2)   |
| N5   | 10872.6(12) | 7500       | 5326.4(10) | 18.3(3)   |

| Atom | x           | y          | z          | $U_{eq}$ |
|------|-------------|------------|------------|----------|
| N6   | 11855.8(12) | 7500       | 4955.3(10) | 18.4(3)  |
| N7   | 11638.0(12) | 7500       | 6765.6(9)  | 15.1(3)  |
| N8   | 9198.8(8)   | 5891.1(14) | 6666.0(6)  | 13.8(2)  |
| C1   | 3638.3(14)  | 2500       | 6036.9(11) | 14.1(3)  |
| C2   | 1605.6(15)  | 2500       | 5596.4(12) | 19.0(4)  |
| C3   | 1909.7(15)  | 2500       | 6480.4(12) | 17.7(4)  |
| C4   | 4800.2(14)  | 2500       | 6241.8(12) | 15.4(4)  |
| C5   | 10812.8(14) | 7500       | 6198.9(11) | 13.5(3)  |
| C6   | 12705.1(15) | 7500       | 5477.0(12) | 18.1(4)  |
| C7   | 12601.5(15) | 7500       | 6390.5(11) | 16.4(4)  |
| C8   | 9704.1(14)  | 7500       | 6548.4(11) | 13.3(3)  |

**Table S23:** Anisotropic Displacement Parameters ( $\times 10^4$ ) for **5e**. The anisotropic displacement factor exponent takes the form:  $-2\pi^2[h^2a^{*2} \times U_{11} + \dots + 2hka^* \times b^* \times U_{12}]$

| Atom | $U_{11}$ | $U_{22}$ | $U_{33}$ | $U_{23}$ | $U_{13}$ | $U_{12}$ |
|------|----------|----------|----------|----------|----------|----------|
| Na1  | 17.1(4)  | 14.8(3)  | 15.7(3)  | 0        | 0.9(3)   | 0        |
| Na2  | 18.5(4)  | 14.0(3)  | 14.5(3)  | 0        | 0.5(3)   | 0        |
| O1   | 18.2(5)  | 11.7(4)  | 33.5(5)  | 1.1(4)   | 1.6(4)   | 4.2(4)   |
| O2   | 11.4(4)  | 17.4(4)  | 30.0(5)  | -0.8(3)  | -1.7(3)  | -2.3(3)  |
| O3   | 11.1(4)  | 16.1(4)  | 20.7(4)  | 1.0(3)   | 1.6(3)   | -1.6(3)  |
| O4   | 17.3(4)  | 12.3(4)  | 29.0(5)  | -1.8(3)  | 1.9(3)   | 3.8(4)   |
| N1   | 16.7(7)  | 23.2(8)  | 16.6(7)  | 0        | 1.0(6)   | 0        |
| N2   | 19.4(8)  | 25.3(8)  | 17.6(7)  | 0        | -3.3(6)  | 0        |
| N3   | 14.6(7)  | 15.0(7)  | 15.4(7)  | 0        | 0.2(5)   | 0        |
| N4   | 12.5(5)  | 14.1(5)  | 19.1(5)  | -0.4(4)  | 1.2(4)   | 0.2(4)   |
| N5   | 14.8(7)  | 23.9(8)  | 16.3(7)  | 0        | -0.3(6)  | 0        |
| N6   | 14.3(7)  | 24.7(8)  | 16.1(7)  | 0        | 1.2(6)   | 0        |
| N7   | 13.6(7)  | 15.8(7)  | 16.1(7)  | 0        | -1.2(5)  | 0        |
| N8   | 13.3(5)  | 13.8(5)  | 14.2(5)  | -0.6(4)  | -1.1(4)  | 0.9(4)   |
| C1   | 13.7(8)  | 11.3(8)  | 17.2(8)  | 0        | 0.3(6)   | 0        |
| C2   | 15.2(9)  | 22.8(9)  | 18.9(8)  | 0        | -3.1(7)  | 0        |
| C3   | 13.9(9)  | 20.8(9)  | 18.5(8)  | 0        | 1.8(7)   | 0        |
| C4   | 13.2(8)  | 11.0(8)  | 21.8(8)  | 0        | 0.1(6)   | 0        |
| C5   | 12.4(8)  | 11.8(8)  | 16.2(8)  | 0        | 0.5(6)   | 0        |
| C6   | 13.9(8)  | 22.3(9)  | 18.1(8)  | 0        | 1.9(7)   | 0        |
| C7   | 12.4(8)  | 19.3(8)  | 17.5(8)  | 0        | -1.4(7)  | 0        |
| C8   | 11.5(8)  | 12.2(8)  | 16.1(8)  | 0        | -0.3(6)  | 0        |

**Table S24:** Bond Lengths in Å for **5e**.

| Atom | Atom             | Length/Å   |
|------|------------------|------------|
| Na1  | Na2 <sup>1</sup> | 4.1732(4)  |
| Na1  | O1               | 2.7940(11) |
| Na1  | O1 <sup>2</sup>  | 2.7940(11) |
| Na1  | O2               | 2.4751(9)  |
| Na1  | O2 <sup>2</sup>  | 2.4751(9)  |

| Atom | Atom            | Length/Å   |
|------|-----------------|------------|
| Na1  | O3 <sup>2</sup> | 2.4856(10) |
| Na1  | O3              | 2.4856(10) |
| Na1  | N1 <sup>3</sup> | 2.6132(16) |
| Na1  | N2 <sup>3</sup> | 2.6358(17) |
| Na1  | N4 <sup>2</sup> | 3.0220(11) |
| Na1  | N4              | 3.0220(11) |
| Na1  | N7 <sup>4</sup> | 2.6048(16) |
| Na2  | O2 <sup>5</sup> | 2.5550(11) |
| Na2  | O2 <sup>6</sup> | 2.5550(11) |
| Na2  | O3 <sup>6</sup> | 2.4693(9)  |
| Na2  | O3 <sup>5</sup> | 2.4693(9)  |
| Na2  | O4 <sup>6</sup> | 2.6267(11) |
| Na2  | O4 <sup>5</sup> | 2.6267(11) |
| Na2  | N3 <sup>7</sup> | 2.4949(15) |
| Na2  | N6              | 2.4593(16) |
| Na2  | N8 <sup>5</sup> | 2.9199(11) |
| Na2  | N8 <sup>6</sup> | 2.9199(11) |
| O1   | N4              | 1.2550(13) |
| O2   | N4              | 1.2525(14) |
| O3   | N8              | 1.2494(14) |
| O4   | N8              | 1.2563(13) |
| N1   | N2              | 1.353(2)   |
| N1   | C1              | 1.331(2)   |
| N2   | C2              | 1.319(3)   |
| N3   | C1              | 1.347(2)   |
| N3   | C3              | 1.325(2)   |
| N4   | C4              | 1.3747(13) |
| N5   | N6              | 1.348(2)   |
| N5   | C5              | 1.332(2)   |
| N6   | C6              | 1.323(2)   |
| N7   | C5              | 1.342(2)   |
| N7   | C7              | 1.328(2)   |
| N8   | C8              | 1.3742(13) |
| C1   | C4              | 1.479(2)   |
| C2   | C3              | 1.400(3)   |
| C5   | C8              | 1.479(2)   |
| C6   | C7              | 1.398(2)   |

—<sup>1</sup>2-x,2-y,1-z; <sup>2</sup>+x,3/2-y,+z; <sup>3</sup>1-x,1-y,1-z; <sup>4</sup>-1/2+x,+y,3/2-z; <sup>5</sup>2-x,1-y,1-z; <sup>6</sup>2-x,1/2+y,1-z; <sup>7</sup>3/2-x,1-y,-1/2+z

**Table S25:** Bond Angles in ° for **5e**.

| Atom            | Atom | Atom             | Angle/°   |
|-----------------|------|------------------|-----------|
| O1 <sup>1</sup> | Na1  | Na2 <sup>2</sup> | 82.80(2)  |
| O1              | Na1  | Na2 <sup>2</sup> | 148.80(3) |
| O1              | Na1  | O1 <sup>1</sup>  | 66.03(4)  |
| O1              | Na1  | N4               | 24.52(3)  |
| O1 <sup>1</sup> | Na1  | N4               | 90.55(3)  |

| Atom            | Atom | Atom             | Angle <sup>°</sup> |
|-----------------|------|------------------|--------------------|
| O1 <sup>1</sup> | Na1  | N4 <sup>1</sup>  | 24.52(3)           |
| O1              | Na1  | N4 <sup>1</sup>  | 90.55(3)           |
| O2 <sup>1</sup> | Na1  | Na2 <sup>2</sup> | 34.56(2)           |
| O2              | Na1  | Na2 <sup>2</sup> | 162.87(3)          |
| O2 <sup>1</sup> | Na1  | O1 <sup>1</sup>  | 48.29(3)           |
| O2              | Na1  | O1               | 48.28(3)           |
| O2 <sup>1</sup> | Na1  | O1               | 114.31(4)          |
| O2              | Na1  | O1 <sup>1</sup>  | 114.31(4)          |
| O2              | Na1  | O2 <sup>1</sup>  | 162.57(5)          |
| O2 <sup>1</sup> | Na1  | O3 <sup>1</sup>  | 66.52(3)           |
| O2              | Na1  | O3               | 66.52(3)           |
| O2              | Na1  | O3 <sup>1</sup>  | 130.70(4)          |
| O2 <sup>1</sup> | Na1  | O3               | 130.70(4)          |
| O2 <sup>1</sup> | Na1  | N1 <sup>3</sup>  | 89.14(3)           |
| O2              | Na1  | N1 <sup>3</sup>  | 89.14(3)           |
| O2 <sup>1</sup> | Na1  | N2 <sup>3</sup>  | 93.56(3)           |
| O2              | Na1  | N2 <sup>3</sup>  | 93.56(3)           |
| O2 <sup>1</sup> | Na1  | N4               | 138.83(4)          |
| O2              | Na1  | N4 <sup>1</sup>  | 138.83(4)          |
| O2              | Na1  | N4               | 23.78(3)           |
| O2 <sup>1</sup> | Na1  | N4 <sup>1</sup>  | 23.78(3)           |
| O2              | Na1  | N7 <sup>4</sup>  | 91.09(3)           |
| O2 <sup>1</sup> | Na1  | N7 <sup>4</sup>  | 91.09(3)           |
| O3              | Na1  | Na2 <sup>2</sup> | 96.50(3)           |
| O3 <sup>1</sup> | Na1  | Na2 <sup>2</sup> | 32.50(2)           |
| O3              | Na1  | O1               | 114.67(3)          |
| O3 <sup>1</sup> | Na1  | O1               | 175.17(4)          |
| O3              | Na1  | O1 <sup>1</sup>  | 175.16(4)          |
| O3 <sup>1</sup> | Na1  | O1 <sup>1</sup>  | 114.67(3)          |
| O3 <sup>1</sup> | Na1  | O3               | 64.21(4)           |
| O3 <sup>1</sup> | Na1  | N1 <sup>3</sup>  | 102.21(4)          |
| O3              | Na1  | N1 <sup>3</sup>  | 102.21(4)          |
| O3 <sup>1</sup> | Na1  | N2 <sup>3</sup>  | 77.00(4)           |
| O3              | Na1  | N2 <sup>3</sup>  | 77.00(4)           |
| O3              | Na1  | N4 <sup>1</sup>  | 154.33(3)          |
| O3 <sup>1</sup> | Na1  | N4               | 154.33(3)          |
| O3 <sup>1</sup> | Na1  | N4 <sup>1</sup>  | 90.26(3)           |
| O3              | Na1  | N4               | 90.26(3)           |
| O3              | Na1  | N7 <sup>4</sup>  | 76.54(4)           |
| O3 <sup>1</sup> | Na1  | N7 <sup>4</sup>  | 76.54(4)           |
| N1 <sup>3</sup> | Na1  | Na2 <sup>2</sup> | 92.55(2)           |
| N1 <sup>3</sup> | Na1  | O1               | 82.60(4)           |
| N1 <sup>3</sup> | Na1  | O1 <sup>1</sup>  | 82.61(4)           |
| N1 <sup>3</sup> | Na1  | N2 <sup>3</sup>  | 29.87(5)           |
| N1 <sup>3</sup> | Na1  | N4               | 85.01(3)           |
| N1 <sup>3</sup> | Na1  | N4 <sup>1</sup>  | 85.01(3)           |
| N2 <sup>3</sup> | Na1  | Na2 <sup>2</sup> | 79.78(2)           |

| Atom             | Atom | Atom             | Angle <sup>o</sup> |
|------------------|------|------------------|--------------------|
| N2 <sup>3</sup>  | Na1  | O1 <sup>1</sup>  | 107.52(4)          |
| N2 <sup>3</sup>  | Na1  | O1               | 107.52(4)          |
| N2 <sup>3</sup>  | Na1  | N4               | 100.86(3)          |
| N2 <sup>3</sup>  | Na1  | N4 <sup>1</sup>  | 100.86(3)          |
| N4               | Na1  | Na2 <sup>2</sup> | 173.16(3)          |
| N4 <sup>1</sup>  | Na1  | Na2 <sup>2</sup> | 58.28(2)           |
| N4 <sup>1</sup>  | Na1  | N4               | 115.07(5)          |
| N7 <sup>4</sup>  | Na1  | Na2 <sup>2</sup> | 86.81(2)           |
| N7 <sup>4</sup>  | Na1  | O1 <sup>1</sup>  | 98.64(4)           |
| N7 <sup>4</sup>  | Na1  | O1               | 98.64(4)           |
| N7 <sup>4</sup>  | Na1  | N1 <sup>3</sup>  | 178.51(6)          |
| N7 <sup>4</sup>  | Na1  | N2 <sup>3</sup>  | 148.64(6)          |
| N7 <sup>4</sup>  | Na1  | N4 <sup>1</sup>  | 95.78(3)           |
| N7 <sup>4</sup>  | Na1  | N4               | 95.78(3)           |
| Na1 <sup>2</sup> | Na2  | Na1 <sup>5</sup> | 128.32(2)          |
| O2 <sup>6</sup>  | Na2  | Na1 <sup>5</sup> | 94.99(3)           |
| O2 <sup>5</sup>  | Na2  | Na1 <sup>5</sup> | 33.33(2)           |
| O2 <sup>6</sup>  | Na2  | Na1 <sup>2</sup> | 33.33(2)           |
| O2 <sup>5</sup>  | Na2  | Na1 <sup>2</sup> | 94.99(3)           |
| O2 <sup>6</sup>  | Na2  | O2 <sup>5</sup>  | 61.66(4)           |
| O2 <sup>6</sup>  | Na2  | O4 <sup>5</sup>  | 170.00(4)          |
| O2 <sup>5</sup>  | Na2  | O4 <sup>5</sup>  | 112.97(3)          |
| O2 <sup>6</sup>  | Na2  | O4 <sup>6</sup>  | 112.97(3)          |
| O2 <sup>5</sup>  | Na2  | O4 <sup>6</sup>  | 170.00(4)          |
| O2 <sup>5</sup>  | Na2  | N8 <sup>5</sup>  | 88.32(3)           |
| O2 <sup>6</sup>  | Na2  | N8 <sup>5</sup>  | 149.86(3)          |
| O2 <sup>6</sup>  | Na2  | N8 <sup>6</sup>  | 88.32(3)           |
| O2 <sup>5</sup>  | Na2  | N8 <sup>6</sup>  | 149.86(3)          |
| O3 <sup>5</sup>  | Na2  | Na1 <sup>5</sup> | 32.74(2)           |
| O3 <sup>6</sup>  | Na2  | Na1 <sup>5</sup> | 159.05(3)          |
| O3 <sup>5</sup>  | Na2  | Na1 <sup>2</sup> | 159.05(3)          |
| O3 <sup>6</sup>  | Na2  | Na1 <sup>2</sup> | 32.74(2)           |
| O3 <sup>5</sup>  | Na2  | O2 <sup>6</sup>  | 126.63(4)          |
| O3 <sup>5</sup>  | Na2  | O2 <sup>5</sup>  | 65.54(3)           |
| O3 <sup>6</sup>  | Na2  | O2 <sup>5</sup>  | 126.63(4)          |
| O3 <sup>6</sup>  | Na2  | O2 <sup>6</sup>  | 65.54(3)           |
| O3 <sup>5</sup>  | Na2  | O3 <sup>6</sup>  | 160.87(5)          |
| O3 <sup>5</sup>  | Na2  | O4 <sup>6</sup>  | 120.40(4)          |
| O3 <sup>6</sup>  | Na2  | O4 <sup>5</sup>  | 120.40(4)          |
| O3 <sup>6</sup>  | Na2  | O4 <sup>6</sup>  | 50.36(3)           |
| O3 <sup>5</sup>  | Na2  | O4 <sup>5</sup>  | 50.36(3)           |
| O3 <sup>6</sup>  | Na2  | N3 <sup>7</sup>  | 82.36(3)           |
| O3 <sup>5</sup>  | Na2  | N3 <sup>7</sup>  | 82.36(3)           |
| O3 <sup>5</sup>  | Na2  | N8 <sup>6</sup>  | 144.56(4)          |
| O3 <sup>6</sup>  | Na2  | N8 <sup>6</sup>  | 25.06(3)           |
| O3 <sup>6</sup>  | Na2  | N8 <sup>5</sup>  | 144.56(4)          |
| O3 <sup>5</sup>  | Na2  | N8 <sup>5</sup>  | 25.06(3)           |

| Atom             | Atom | Atom             | Angle <sup>o</sup> |
|------------------|------|------------------|--------------------|
| O4 <sup>5</sup>  | Na2  | Na1 <sup>5</sup> | 80.03(2)           |
| O4 <sup>6</sup>  | Na2  | Na1 <sup>2</sup> | 80.03(2)           |
| O4 <sup>5</sup>  | Na2  | Na1 <sup>2</sup> | 150.58(3)          |
| O4 <sup>6</sup>  | Na2  | Na1 <sup>5</sup> | 150.58(3)          |
| O4 <sup>5</sup>  | Na2  | O4 <sup>6</sup>  | 70.91(4)           |
| O4 <sup>6</sup>  | Na2  | N8 <sup>5</sup>  | 96.28(4)           |
| O4 <sup>6</sup>  | Na2  | N8 <sup>6</sup>  | 25.48(3)           |
| O4 <sup>5</sup>  | Na2  | N8 <sup>6</sup>  | 96.28(4)           |
| O4 <sup>5</sup>  | Na2  | N8 <sup>5</sup>  | 25.48(3)           |
| N3 <sup>7</sup>  | Na2  | Na1 <sup>5</sup> | 91.29(2)           |
| N3 <sup>7</sup>  | Na2  | Na1 <sup>2</sup> | 91.29(2)           |
| N3 <sup>7</sup>  | Na2  | O2 <sup>5</sup>  | 92.52(4)           |
| N3 <sup>7</sup>  | Na2  | O2 <sup>6</sup>  | 92.52(4)           |
| N3 <sup>7</sup>  | Na2  | O4 <sup>5</sup>  | 96.24(4)           |
| N3 <sup>7</sup>  | Na2  | O4 <sup>6</sup>  | 96.24(4)           |
| N3 <sup>7</sup>  | Na2  | N8 <sup>6</sup>  | 91.33(3)           |
| N3 <sup>7</sup>  | Na2  | N8 <sup>5</sup>  | 91.33(3)           |
| N6               | Na2  | Na1 <sup>2</sup> | 88.43(2)           |
| N6               | Na2  | Na1 <sup>5</sup> | 88.43(2)           |
| N6               | Na2  | O2 <sup>5</sup>  | 86.93(4)           |
| N6               | Na2  | O2 <sup>6</sup>  | 86.93(4)           |
| N6               | Na2  | O3 <sup>5</sup>  | 97.71(3)           |
| N6               | Na2  | O3 <sup>6</sup>  | 97.71(3)           |
| N6               | Na2  | O4 <sup>5</sup>  | 84.28(4)           |
| N6               | Na2  | O4 <sup>6</sup>  | 84.28(4)           |
| N6               | Na2  | N3 <sup>7</sup>  | 179.37(6)          |
| N6               | Na2  | N8 <sup>5</sup>  | 88.98(3)           |
| N6               | Na2  | N8 <sup>6</sup>  | 88.98(3)           |
| N8 <sup>6</sup>  | Na2  | Na1 <sup>5</sup> | 175.69(3)          |
| N8 <sup>5</sup>  | Na2  | Na1 <sup>2</sup> | 175.69(3)          |
| N8 <sup>5</sup>  | Na2  | Na1 <sup>5</sup> | 55.03(2)           |
| N8 <sup>6</sup>  | Na2  | Na1 <sup>2</sup> | 55.03(2)           |
| N8 <sup>5</sup>  | Na2  | N8 <sup>6</sup>  | 121.48(5)          |
| N4               | O1   | Na1              | 87.96(7)           |
| Na1              | O2   | Na2 <sup>5</sup> | 112.11(4)          |
| N4               | O2   | Na1              | 103.41(7)          |
| N4               | O2   | Na2 <sup>5</sup> | 144.18(8)          |
| Na2 <sup>5</sup> | O3   | Na1              | 114.75(4)          |
| N8               | O3   | Na1              | 132.99(7)          |
| N8               | O3   | Na2 <sup>5</sup> | 98.08(7)           |
| N8               | O4   | Na2 <sup>5</sup> | 90.42(7)           |
| N2               | N1   | Na1 <sup>3</sup> | 75.99(9)           |
| C1               | N1   | Na1 <sup>3</sup> | 165.91(13)         |
| C1               | N1   | N2               | 118.11(15)         |
| N1               | N2   | Na1 <sup>3</sup> | 74.15(9)           |
| C2               | N2   | Na1 <sup>3</sup> | 166.96(13)         |
| C2               | N2   | N1               | 118.90(15)         |

| Atom             | Atom | Atom             | Angle <sup>°</sup> |
|------------------|------|------------------|--------------------|
| C1               | N3   | Na2 <sup>8</sup> | 136.27(12)         |
| C3               | N3   | Na2 <sup>8</sup> | 108.61(11)         |
| C3               | N3   | C1               | 115.12(15)         |
| O1               | N4   | Na1              | 67.51(6)           |
| O1               | N4   | C4               | 116.38(11)         |
| O2               | N4   | Na1              | 52.82(6)           |
| O2               | N4   | O1               | 120.29(10)         |
| O2               | N4   | C4               | 123.33(11)         |
| C4               | N4   | Na1              | 175.64(9)          |
| C5               | N5   | N6               | 118.02(15)         |
| N5               | N6   | Na2              | 117.49(11)         |
| C6               | N6   | Na2              | 124.29(12)         |
| C6               | N6   | N5               | 118.22(15)         |
| C5               | N7   | Na1 <sup>9</sup> | 129.00(12)         |
| C7               | N7   | Na1 <sup>9</sup> | 116.56(11)         |
| C7               | N7   | C5               | 114.44(15)         |
| O3               | N8   | Na2 <sup>5</sup> | 56.85(6)           |
| O3               | N8   | O4               | 120.26(10)         |
| O3               | N8   | C8               | 123.57(11)         |
| O4               | N8   | Na2 <sup>5</sup> | 64.10(6)           |
| O4               | N8   | C8               | 116.17(11)         |
| C8               | N8   | Na2 <sup>5</sup> | 172.01(9)          |
| N1               | C1   | N3               | 125.90(16)         |
| N1               | C1   | C4               | 115.86(15)         |
| N3               | C1   | C4               | 118.24(15)         |
| N2               | C2   | C3               | 120.98(17)         |
| N3               | C3   | C2               | 120.99(17)         |
| N4               | C4   | N4 <sup>10</sup> | 122.69(16)         |
| N4               | C4   | C1               | 118.64(8)          |
| N4 <sup>10</sup> | C4   | C1               | 118.64(8)          |
| N5               | C5   | N7               | 126.86(16)         |
| N5               | C5   | C8               | 114.31(15)         |
| N7               | C5   | C8               | 118.83(15)         |
| N6               | C6   | C7               | 121.67(17)         |
| N7               | C7   | C6               | 120.79(16)         |
| N8               | C8   | N8 <sup>1</sup>  | 123.16(15)         |
| N8 <sup>1</sup>  | C8   | C5               | 118.29(8)          |
| N8               | C8   | C5               | 118.29(8)          |

—<sup>1</sup>+x,3/2-y,+z; <sup>2</sup>2-x,2-y,1-z; <sup>3</sup>1-x,1-y,1-z; <sup>4</sup>-1/2+x,+y,3/2-z; <sup>5</sup>2-x,1-y,1-z; <sup>6</sup>2-x,1/2+y,1-z; <sup>7</sup>3/2-x,1-y,-1/2+z; <sup>8</sup>3/2-x,1-y,1/2+z; <sup>9</sup>1/2+x,+y,3/2-z; <sup>10</sup>+x,1/2-y,+z

**Table S26:** Torsion Angles in <sup>°</sup> for **5e**.

| Atom | Atom | Atom | Atom | Angle <sup>°</sup> |
|------|------|------|------|--------------------|
| Na1  | O1   | N4   | O2   | 2.17(11)           |
| Na1  | O1   | N4   | C4   | -177.84(11)        |
| Na1  | O2   | N4   | O1   | -2.52(13)          |

| Atom             | Atom | Atom | Atom             | Angle/ <sup>o</sup> |
|------------------|------|------|------------------|---------------------|
| Na1              | O2   | N4   | C4               | 177.49(12)          |
| Na1              | O3   | N8   | Na2 <sup>1</sup> | -135.27(10)         |
| Na1              | O3   | N8   | O4               | -145.23(9)          |
| Na1              | O3   | N8   | C8               | 35.17(17)           |
| Na1 <sup>2</sup> | N1   | N2   | C2               | 180.000(0)          |
| Na1 <sup>2</sup> | N1   | C1   | N3               | 180.000(1)          |
| Na1 <sup>2</sup> | N1   | C1   | C4               | 0.000(1)            |
| Na1 <sup>2</sup> | N2   | C2   | C3               | 180.000(1)          |
| Na1 <sup>3</sup> | N7   | C5   | N5               | 180.000(0)          |
| Na1 <sup>3</sup> | N7   | C5   | C8               | 0.000(0)            |
| Na1 <sup>3</sup> | N7   | C7   | C6               | 180.000(0)          |
| Na2 <sup>1</sup> | O2   | N4   | Na1              | -172.53(16)         |
| Na2 <sup>1</sup> | O2   | N4   | O1               | -175.05(9)          |
| Na2 <sup>1</sup> | O2   | N4   | C4               | 5.0(2)              |
| Na2 <sup>1</sup> | O3   | N8   | O4               | -9.95(11)           |
| Na2 <sup>1</sup> | O3   | N8   | C8               | 170.45(11)          |
| Na2 <sup>1</sup> | O4   | N8   | O3               | 9.26(10)            |
| Na2 <sup>1</sup> | O4   | N8   | C8               | -171.11(10)         |
| Na2 <sup>4</sup> | N3   | C1   | N1               | 180.000(0)          |
| Na2 <sup>4</sup> | N3   | C1   | C4               | 0.000(0)            |
| Na2 <sup>4</sup> | N3   | C3   | C2               | 180.000(0)          |
| Na2              | N6   | C6   | C7               | 180.000(0)          |
| O1               | N4   | C4   | N4 <sup>5</sup>  | -176.30(11)         |
| O1               | N4   | C4   | C1               | 1.7(2)              |
| O2               | N4   | C4   | N4 <sup>5</sup>  | 3.7(3)              |
| O2               | N4   | C4   | C1               | -178.29(13)         |
| O3               | N8   | C8   | N8 <sup>6</sup>  | 0.8(2)              |
| O3               | N8   | C8   | C5               | -173.31(12)         |
| O4               | N8   | C8   | N8 <sup>6</sup>  | -178.82(11)         |
| O4               | N8   | C8   | C5               | 7.07(19)            |
| N1               | N2   | C2   | C3               | 0.000(0)            |
| N1               | C1   | C4   | N4 <sup>5</sup>  | -90.95(14)          |
| N1               | C1   | C4   | N4               | 90.95(14)           |
| N2               | N1   | C1   | N3               | 0.000(0)            |
| N2               | N1   | C1   | C4               | 180.000(0)          |
| N2               | C2   | C3   | N3               | 0.000(0)            |
| N3               | C1   | C4   | N4               | -89.05(14)          |
| N3               | C1   | C4   | N4 <sup>5</sup>  | 89.05(14)           |
| N5               | N6   | C6   | C7               | 0.000(0)            |
| N5               | C5   | C8   | N8               | 87.20(13)           |
| N5               | C5   | C8   | N8 <sup>6</sup>  | -87.20(13)          |
| N6               | N5   | C5   | N7               | 0.000(0)            |
| N6               | N5   | C5   | C8               | 180.000(0)          |
| N6               | C6   | C7   | N7               | 0.000(0)            |
| N7               | C5   | C8   | N8               | -92.80(13)          |
| N7               | C5   | C8   | N8 <sup>6</sup>  | 92.80(13)           |
| C1               | N1   | N2   | Na1 <sup>2</sup> | 180.000(0)          |



| Atom | Atom | Atom | Atom | Angle/ $^{\circ}$ |
|------|------|------|------|-------------------|
| C1   | N1   | N2   | C2   | 0.000(0)          |
| C1   | N3   | C3   | C2   | 0.000(0)          |
| C3   | N3   | C1   | N1   | 0.000(0)          |
| C3   | N3   | C1   | C4   | 180.000(0)        |
| C5   | N5   | N6   | Na2  | 180.000(0)        |
| C5   | N5   | N6   | C6   | 0.000(0)          |
| C5   | N7   | C7   | C6   | 0.000(0)          |
| C7   | N7   | C5   | N5   | 0.000(0)          |
| C7   | N7   | C5   | C8   | 180.000(0)        |

—<sup>1</sup>2-x,1-y,1-z; <sup>2</sup>1-x,1-y,1-z; <sup>3</sup>1/2+x,+y,3/2-z; <sup>4</sup>3/2-x,1-y,1/2+z; <sup>5</sup>+x,1/2-y,+z; <sup>6</sup>+x,3/2-y,+z

**Table S27:** Hydrogen Fractional Atomic Coordinates ( $\times 10^4$ ) and Equivalent Isotropic Displacement Parameters ( $\text{\AA}^2 \times 10^3$ ) for **5e**.  $U_{eq}$  is defined as 1/3 of the trace of the orthogonalised  $U_{ij}$ .

| Atom | x         | y    | z        | $U_{eq}$ |
|------|-----------|------|----------|----------|
| H2   | 880(20)   | 2500 | 5441(16) | 26(6)    |
| H3   | 1380(20)  | 2500 | 6954(16) | 27(6)    |
| H6   | 13402(19) | 7500 | 5208(14) | 17(5)    |
| H7   | 13211(19) | 7500 | 6744(15) | 18(6)    |

**Table S28.** Crystallographic data and structure refinement details for **9**, **11** and **12a**

| <b>Compound</b>                                | <b>9</b>                                                                   | <b>11</b>                                                    | <b>12a</b>                                                                 |
|------------------------------------------------|----------------------------------------------------------------------------|--------------------------------------------------------------|----------------------------------------------------------------------------|
| Formula                                        | C <sub>9</sub> H <sub>4</sub> F <sub>3</sub> N <sub>5</sub> O <sub>4</sub> | C <sub>5</sub> H <sub>7</sub> N <sub>11</sub> O <sub>4</sub> | C <sub>7</sub> H <sub>8</sub> F <sub>3</sub> N <sub>5</sub> O <sub>5</sub> |
| <i>D</i> <sub>calc.</sub> / g cm <sup>-3</sup> | 1.952                                                                      | 1.669                                                        | 1.714                                                                      |
| $\mu$ /mm <sup>-1</sup>                        | 1.854                                                                      | 1.259                                                        | 1.557                                                                      |
| Formula Weight                                 | 341.17                                                                     | 285.22                                                       | 299.18                                                                     |
| Color                                          | yellow                                                                     | yellow                                                       | colorless                                                                  |
| Shape                                          | plate                                                                      | plate                                                        | plate                                                                      |
| Size/mm <sup>3</sup>                           | 0.26×0.17×0.08                                                             | 0.31×0.24×0.07                                               | 0.48×0.34×0.08                                                             |
| <i>T</i> /K                                    | 173(1)                                                                     | 172.99                                                       | 173(1)                                                                     |
| Crystal System                                 | monoclinic                                                                 | monoclinic                                                   | triclinic                                                                  |
| Space Group                                    | <i>P</i> 2 <sub>1</sub> / <i>c</i>                                         | <i>C</i> 2/ <i>c</i>                                         | <i>P</i> -1                                                                |
| <i>a</i> /Å                                    | 14.2809(2)                                                                 | 27.0867(4)                                                   | 7.6530(4)                                                                  |
| <i>b</i> /Å                                    | 6.21890(10)                                                                | 6.36110(10)                                                  | 8.3737(4)                                                                  |
| <i>c</i> /Å                                    | 14.2905(2)                                                                 | 13.7829(2)                                                   | 10.1818(6)                                                                 |
| $\alpha$ <sup>o</sup>                          | 90                                                                         | 90                                                           | 108.537(4)                                                                 |
| $\beta$ <sup>o</sup>                           | 113.8050(10)                                                               | 107.1240(10)                                                 | 105.840(4)                                                                 |
| $\gamma$ <sup>o</sup>                          | 90                                                                         | 90                                                           | 96.862(3)                                                                  |
| <i>V</i> /Å <sup>3</sup>                       | 1161.19(3)                                                                 | 2269.53(6)                                                   | 579.73(6)                                                                  |
| <i>Z</i>                                       | 4                                                                          | 8                                                            | 2                                                                          |
| <i>Z</i> '                                     | 1                                                                          | 1                                                            | 1                                                                          |
| Wavelength/Å                                   | 1.54178                                                                    | 1.54178                                                      | 1.54178                                                                    |
| Radiation type                                 | CuK $\alpha$                                                               | CuK $\alpha$                                                 | CuK $\alpha$                                                               |
| $\theta$ <sub>min</sub> <sup>o</sup>           | 6.228                                                                      | 3.415                                                        | 4.853                                                                      |
| $\theta$ <sub>max</sub> <sup>o</sup>           | 72.357                                                                     | 70.052                                                       | 68.151                                                                     |
| Measured Refl's.                               | 7683                                                                       | 7818                                                         | 7520                                                                       |
| Ind't Refl's                                   | 2246                                                                       | 2144                                                         | 2067                                                                       |
| Refl's with <i>I</i> > 2( <i>I</i> )           | 1966                                                                       | 1862                                                         | 1816                                                                       |
| <i>R</i> <sub>int</sub>                        | 0.0298                                                                     | 0.0292                                                       | 0.0501                                                                     |
| Parameters                                     | 221                                                                        | 193                                                          | 213                                                                        |
| Restraints                                     | 0                                                                          | 0                                                            | 0                                                                          |
| Largest Peak                                   | 0.321                                                                      | 0.207                                                        | 0.290                                                                      |
| Deepest Hole                                   | -0.243                                                                     | -0.228                                                       | -0.314                                                                     |
| GooF                                           | 1.103                                                                      | 1.022                                                        | 1.037                                                                      |
| <i>wR</i> <sub>2</sub> (all data)              | 0.1100                                                                     | 0.1100                                                       | 0.1142                                                                     |
| <i>wR</i> <sub>2</sub>                         | 0.0962                                                                     | 0.1051                                                       | 0.1105                                                                     |
| <i>R</i> <sub><i>I</i></sub> (all data)        | 0.0411                                                                     | 0.0445                                                       | 0.0457                                                                     |
| <i>R</i> <sub><i>I</i></sub>                   | 0.0352                                                                     | 0.0389                                                       | 0.0415                                                                     |
| <b>CCDC</b>                                    | <b>1975379</b>                                                             | <b>1975378</b>                                               | <b>2154059</b>                                                             |

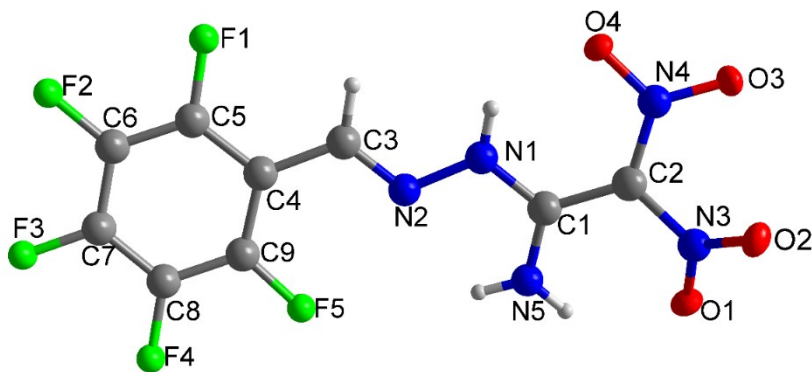

**Figure S10:** Thermal ellipsoids shown at 50% 9.

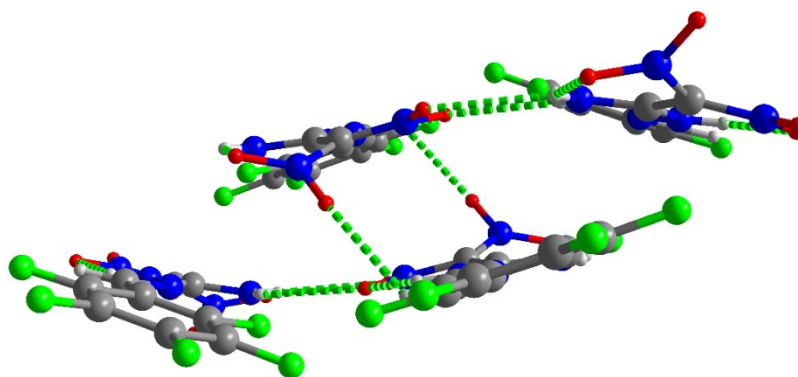

**Figure S11:** Ball-and-stick packing diagram of 9 viewed up the b axis

**Table S29:** Fractional Atomic Coordinates ( $\times 10^4$ ) and Equivalent Isotropic Displacement Parameters ( $\text{\AA}^2 \times 10^3$ ) for 9.  $U_{eq}$  is defined as 1/3 of the trace of the orthogonalised  $U_{ij}$ .

| Atom | x          | y          | z          | $U_{eq}$ |
|------|------------|------------|------------|----------|
| F1   | 9495.0(8)  | 1963.0(18) | 5453.1(8)  | 29.1(3)  |
| F2   | 10962.8(8) | 2684.2(18) | 4777.0(9)  | 32.4(3)  |
| F3   | 10457.6(9) | 4105(2)    | 2824.7(9)  | 38.0(3)  |
| F4   | 8466.3(9)  | 4778.8(19) | 1578.1(8)  | 33.7(3)  |
| F5   | 6994.9(7)  | 3915.1(17) | 2197.3(7)  | 26.8(3)  |
| O1   | 2658.2(9)  | 3566(2)    | 2486.1(9)  | 28.7(3)  |
| O2   | 2658.1(10) | 5042(2)    | 3856.8(10) | 29.2(3)  |
| O3   | 3529.4(10) | 2145(2)    | 5267.3(10) | 28.5(3)  |
| O4   | 5155.4(9)  | 2127(2)    | 5624.5(9)  | 24.4(3)  |
| N1   | 5790.8(11) | 2645(2)    | 4169.3(11) | 20.5(3)  |
| N2   | 6461.3(11) | 2810(2)    | 3700.3(11) | 22.0(3)  |
| N3   | 3057.9(10) | 3902(2)    | 3418.6(11) | 20.6(3)  |
| N4   | 4241.0(10) | 2432(2)    | 5005.1(11) | 19.2(3)  |
| N5   | 4539.7(12) | 3194(3)    | 2579.5(11) | 24.7(3)  |
| C1   | 4798.0(13) | 2930(2)    | 3568.9(12) | 18.9(3)  |
| C2   | 4046.8(12) | 3013(3)    | 4003.8(12) | 19.0(3)  |
| C3   | 7410.8(13) | 2584(3)    | 4275.9(13) | 21.4(4)  |

| Atom | x          | y       | z          | $U_e$   |
|------|------------|---------|------------|---------|
| C4   | 8177.6(13) | 2906(2) | 3857.5(13) | 20.2(4) |
| C5   | 9217.8(13) | 2600(3) | 4478.6(13) | 21.9(4) |
| C6   | 9982.2(13) | 2979(3) | 4150.1(14) | 23.8(4) |
| C7   | 9726.7(13) | 3713(3) | 3164.3(14) | 24.7(4) |
| C8   | 8719.7(14) | 4043(3) | 2530.7(13) | 23.9(4) |
| C9   | 7958.4(13) | 3618(3) | 2865.5(13) | 20.9(3) |

**Table S30:** Anisotropic Displacement Parameters ( $\times 10^4$ ) for **9**. The anisotropic displacement factor exponent takes the form:  $-2\pi^2[h^2a^{*2} \times U_{11} + \dots + 2hka^* \times b^* \times U_{12}]$

| Atom | $U_{11}$ | $U_{22}$ | $U_{33}$ | $U_{23}$ | $U_{13}$ | $U_{12}$ |
|------|----------|----------|----------|----------|----------|----------|
| F1   | 24.7(6)  | 36.2(6)  | 22.4(5)  | 4.6(4)   | 5.4(4)   | 1.8(4)   |
| F2   | 16.4(6)  | 38.8(6)  | 37.2(6)  | -3.1(5)  | 5.9(4)   | 0.4(4)   |
| F3   | 26.7(6)  | 50.5(8)  | 44.9(7)  | 2.4(5)   | 22.8(5)  | -4.5(5)  |
| F4   | 34.8(6)  | 45.2(7)  | 24.3(5)  | 3.4(5)   | 15.1(4)  | -3.3(5)  |
| F5   | 17.4(5)  | 36.1(6)  | 22.9(5)  | 1.3(4)   | 4.1(4)   | 0.6(4)   |
| O1   | 23.6(7)  | 35.7(7)  | 21.0(6)  | 2.0(5)   | 3.1(5)   | 3.4(5)   |
| O2   | 23.5(7)  | 31.8(7)  | 32.9(7)  | 0.2(5)   | 12.0(5)  | 8.6(5)   |
| O3   | 21.7(7)  | 39.2(7)  | 27.9(6)  | 6.1(5)   | 13.5(5)  | -0.2(5)  |
| O4   | 18.6(6)  | 31.1(7)  | 20.1(6)  | 2.1(5)   | 4.3(5)   | 1.5(5)   |
| N1   | 17.2(7)  | 24.6(7)  | 20.6(7)  | 0.0(6)   | 8.6(5)   | 0.2(5)   |
| N2   | 20.6(8)  | 22.9(7)  | 25.1(7)  | -1.8(6)  | 12.0(6)  | -1.5(5)  |
| N3   | 16.0(7)  | 20.4(7)  | 23.7(7)  | 2.7(5)   | 6.2(5)   | -0.1(5)  |
| N4   | 16.2(7)  | 18.8(7)  | 21.2(7)  | -0.6(5)  | 6.1(5)   | -0.2(5)  |
| N5   | 21.8(8)  | 32.1(8)  | 20.7(7)  | 1.5(6)   | 9.0(6)   | 1.3(6)   |
| C1   | 19.7(8)  | 13.4(7)  | 22.1(8)  | -0.7(6)  | 7.0(6)   | -0.5(6)  |
| C2   | 16.0(8)  | 18.8(8)  | 20.5(8)  | 0.4(6)   | 5.5(6)   | 0.3(6)   |
| C3   | 19.9(9)  | 22.3(8)  | 22.9(8)  | -1.7(6)  | 9.6(7)   | 1.0(6)   |
| C4   | 19.9(9)  | 17.1(8)  | 23.0(8)  | -3.2(6)  | 7.9(6)   | -1.2(6)  |
| C5   | 22.1(9)  | 20.1(8)  | 20.9(8)  | -2.1(6)  | 6.1(7)   | 0.2(6)   |
| C6   | 15.3(9)  | 21.8(8)  | 30.8(9)  | -4.8(7)  | 5.6(7)   | -1.1(6)  |
| C7   | 22.3(9)  | 24.5(8)  | 32.6(9)  | -4.5(7)  | 16.5(7)  | -4.5(6)  |
| C8   | 26.5(9)  | 24.4(8)  | 22.6(8)  | -2.8(7)  | 11.7(7)  | -2.8(6)  |
| C9   | 18.8(8)  | 19.3(8)  | 22.2(8)  | -3.5(6)  | 5.8(6)   | -0.2(6)  |

**Table S31:** Bond Lengths in Å for **9**.

| Atom | Atom | Length/Å   |
|------|------|------------|
| F1   | C5   | 1.345(2)   |
| F2   | C6   | 1.336(2)   |
| F3   | C7   | 1.3392(19) |
| F4   | C8   | 1.340(2)   |
| F5   | C9   | 1.3335(19) |
| O1   | N3   | 1.2374(18) |
| O2   | N3   | 1.2290(19) |
| O3   | N4   | 1.2298(19) |
| O4   | N4   | 1.2616(19) |

| Atom | Atom | Length/Å |
|------|------|----------|
| N1   | N2   | 1.376(2) |
| N1   | C1   | 1.340(2) |
| N2   | C3   | 1.279(2) |
| N3   | C2   | 1.430(2) |
| N4   | C2   | 1.391(2) |
| N5   | C1   | 1.320(2) |
| C1   | C2   | 1.442(2) |
| C3   | C4   | 1.458(2) |
| C4   | C5   | 1.402(2) |
| C4   | C9   | 1.395(2) |
| C5   | C6   | 1.372(2) |
| C6   | C7   | 1.382(3) |
| C7   | C8   | 1.371(3) |
| C8   | C9   | 1.379(2) |

**Table S32:** Bond Angles in ° for **9**.

| Atom | Atom | Atom | Angle/°    |
|------|------|------|------------|
| C1   | N1   | N2   | 116.27(14) |
| C3   | N2   | N1   | 116.37(15) |
| O1   | N3   | C2   | 118.82(14) |
| O2   | N3   | O1   | 122.61(14) |
| O2   | N3   | C2   | 118.50(14) |
| O3   | N4   | O4   | 120.86(14) |
| O3   | N4   | C2   | 120.34(13) |
| O4   | N4   | C2   | 118.74(13) |
| N1   | C1   | C2   | 120.52(15) |
| N5   | C1   | N1   | 117.93(15) |
| N5   | C1   | C2   | 121.52(15) |
| N3   | C2   | C1   | 119.51(14) |
| N4   | C2   | N3   | 116.21(14) |
| N4   | C2   | C1   | 124.07(14) |
| N2   | C3   | C4   | 119.88(16) |
| C5   | C4   | C3   | 120.06(16) |
| C9   | C4   | C3   | 124.25(16) |
| C9   | C4   | C5   | 115.61(15) |
| F1   | C5   | C4   | 119.29(15) |
| F1   | C5   | C6   | 117.58(15) |
| C6   | C5   | C4   | 123.10(16) |
| F2   | C6   | C5   | 120.70(16) |
| F2   | C6   | C7   | 120.18(15) |
| C5   | C6   | C7   | 119.11(16) |
| F3   | C7   | C6   | 120.38(16) |
| F3   | C7   | C8   | 119.78(16) |
| C8   | C7   | C6   | 119.84(16) |
| F4   | C8   | C7   | 120.22(15) |
| F4   | C8   | C9   | 119.37(15) |

| Atom | Atom | Atom | Angle <sup>°</sup> |
|------|------|------|--------------------|
| C7   | C8   | C9   | 120.40(16)         |
| F5   | C9   | C4   | 121.00(15)         |
| F5   | C9   | C8   | 117.09(15)         |
| C8   | C9   | C4   | 121.91(16)         |

**Table S33:** Torsion Angles in <sup>°</sup> for **9**.

| Atom | Atom | Atom | Atom | Angle <sup>°</sup> |
|------|------|------|------|--------------------|
| F1   | C5   | C6   | F2   | 1.2(2)             |
| F1   | C5   | C6   | C7   | -177.60(15)        |
| F2   | C6   | C7   | F3   | 1.0(3)             |
| F2   | C6   | C7   | C8   | -178.98(15)        |
| F3   | C7   | C8   | F4   | -0.7(3)            |
| F3   | C7   | C8   | C9   | 179.10(15)         |
| F4   | C8   | C9   | F5   | 1.8(2)             |
| F4   | C8   | C9   | C4   | -178.25(15)        |
| O1   | N3   | C2   | N4   | -147.79(15)        |
| O1   | N3   | C2   | C1   | 37.1(2)            |
| O2   | N3   | C2   | N4   | 35.2(2)            |
| O2   | N3   | C2   | C1   | -139.91(16)        |
| O3   | N4   | C2   | N3   | 19.3(2)            |
| O3   | N4   | C2   | C1   | -165.91(15)        |
| O4   | N4   | C2   | N3   | -163.44(14)        |
| O4   | N4   | C2   | C1   | 11.4(2)            |
| N1   | N2   | C3   | C4   | -175.07(13)        |
| N1   | C1   | C2   | N3   | 162.52(14)         |
| N1   | C1   | C2   | N4   | -12.1(2)           |
| N2   | N1   | C1   | N5   | 4.5(2)             |
| N2   | N1   | C1   | C2   | -173.49(13)        |
| N2   | C3   | C4   | C5   | -178.18(15)        |
| N2   | C3   | C4   | C9   | 5.1(3)             |
| N5   | C1   | C2   | N3   | -15.4(2)           |
| N5   | C1   | C2   | N4   | 169.94(15)         |
| C1   | N1   | N2   | C3   | 178.57(14)         |
| C3   | C4   | C5   | F1   | 1.4(2)             |
| C3   | C4   | C5   | C6   | -176.61(15)        |
| C3   | C4   | C9   | F5   | -4.8(2)            |
| C3   | C4   | C9   | C8   | 175.28(15)         |
| C4   | C5   | C6   | F2   | 179.24(14)         |
| C4   | C5   | C6   | C7   | 0.5(3)             |
| C5   | C4   | C9   | F5   | 178.32(14)         |
| C5   | C4   | C9   | C8   | -1.6(2)            |
| C5   | C6   | C7   | F3   | 179.73(15)         |
| C5   | C6   | C7   | C8   | -0.2(3)            |
| C6   | C7   | C8   | F4   | 179.21(15)         |
| C6   | C7   | C8   | C9   | -0.9(3)            |
| C7   | C8   | C9   | F5   | -178.00(14)        |

| Atom | Atom | Atom | Atom | Angle/°    |
|------|------|------|------|------------|
| C7   | C8   | C9   | C4   | 1.9(3)     |
| C9   | C4   | C5   | F1   | 178.45(14) |
| C9   | C4   | C5   | C6   | 0.4(2)     |

**Table S34:** Hydrogen Fractional Atomic Coordinates ( $\times 10^4$ ) and Equivalent Isotropic Displacement Parameters ( $\text{\AA}^2 \times 10^3$ ) for **9**.  $U_{eq}$  is defined as 1/3 of the trace of the orthogonalised  $U_{ij}$ .

| Atom | x        | y        | z        | $U_{eq}$ |
|------|----------|----------|----------|----------|
| H1   | 5976(16) | 2490(30) | 4813(17) | 23(5)    |
| H5A  | 3900(20) | 3240(50) | 2160(20) | 61(9)    |
| H5B  | 5004(19) | 3180(40) | 2354(17) | 28(5)    |
| H3   | 7616.34  | 2206.58  | 4974.94  | 26       |

**Table S35:** Hydrogen Bond information for **9**.

| D  | H   | A               | d(D-H)/\AA | d(H-A)/\AA | d(D-A)/\AA | D-H-A/deg |
|----|-----|-----------------|------------|------------|------------|-----------|
| N1 | H1  | O4              | 0.85(2)    | 1.97(2)    | 2.6028(19) | 130.4(19) |
| N5 | H5A | O1              | 0.87(3)    | 2.01(3)    | 2.646(2)   | 129(3)    |
| N5 | H5A | O3 <sup>1</sup> | 0.87(3)    | 2.55(3)    | 3.032(2)   | 116(2)    |

<sup>1</sup>+x,1/2-y,-1/2+z

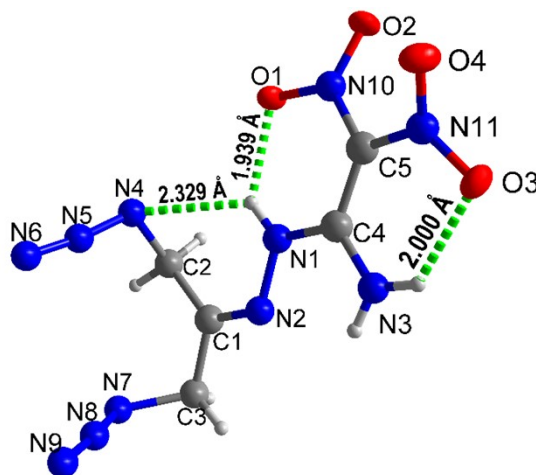

**Figure S12:** Thermal ellipsoids shown at 50% **11**.

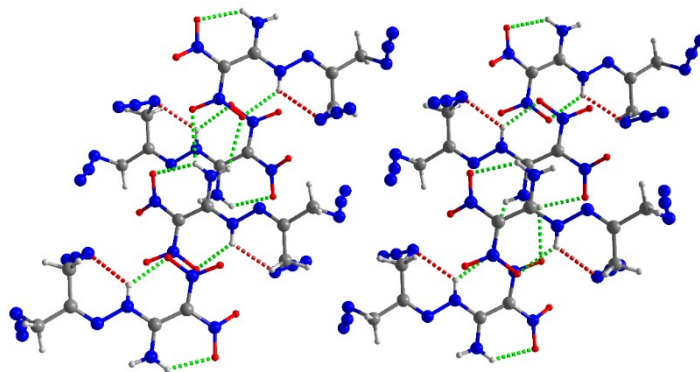

**Figure S13:** Ball-and-stick packing diagram of **11** viewed up the b axis. Dashed lines indicate strong hydrogen bonding.

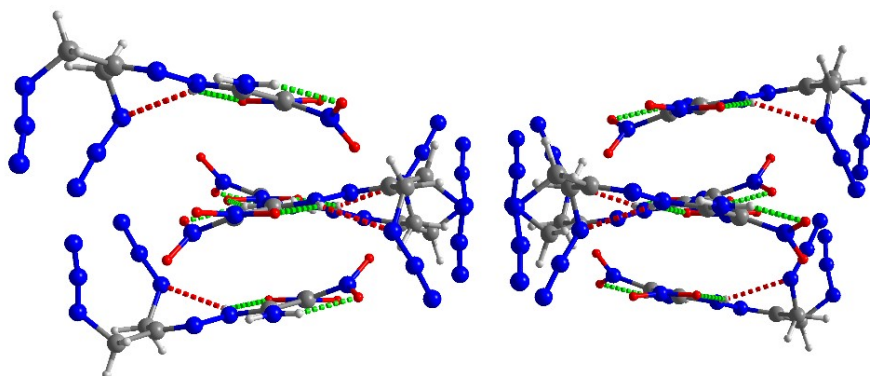

**Figure S14:** Ball-and-stick packing diagram of **11** viewed up the c axis. Dashed lines indicate strong hydrogen bonding.

**Table S36:** Fractional Atomic Coordinates ( $\times 10^4$ ) and Equivalent Isotropic Displacement Parameters ( $\text{\AA}^2 \times 10^3$ ) for **11**.  $U_{eq}$  is defined as 1/3 of the trace of the orthogonalised  $U_{ij}$ .

| Atom | x         | y          | z          | $U_{eq}$ |
|------|-----------|------------|------------|----------|
| O1   | 7316.3(4) | 5326(2)    | 2245.0(8)  | 29.4(3)  |
| O2   | 8143.2(4) | 5280.4(19) | 2484.3(9)  | 30.0(3)  |
| O3   | 8492.2(5) | 5705(2)    | 5379.8(9)  | 33.8(3)  |
| O4   | 8576.8(5) | 7460(2)    | 4094.1(9)  | 38.0(3)  |
| N1   | 6950.8(5) | 4782(2)    | 3748.0(10) | 22.9(3)  |
| N2   | 6591.0(5) | 4376(2)    | 4258.9(10) | 24.4(3)  |
| N3   | 7535.1(6) | 4976(2)    | 5318.4(10) | 24.5(3)  |
| N4   | 6054.8(6) | 6132(2)    | 2132.7(11) | 32.2(3)  |
| N5   | 5818.3(6) | 7686(2)    | 2309.6(11) | 33.4(3)  |
| N6   | 5626.9(7) | 9207(3)    | 2410.0(16) | 51.3(5)  |
| N7   | 5293.5(6) | 5051(3)    | 3980.1(13) | 39.1(4)  |
| N8   | 5344.4(5) | 6723(3)    | 4453.7(13) | 39.0(4)  |
| N9   | 5334.0(8) | 8284(3)    | 4822(2)    | 69.9(6)  |
| N10  | 7770.7(5) | 5383.0(19) | 2823.9(10) | 22.2(3)  |



| Atom | x         | y       | z          | $U_{eq}$ |
|------|-----------|---------|------------|----------|
| N11  | 8336.4(5) | 6231(2) | 4472.1(10) | 26.2(3)  |
| C1   | 6124.5(6) | 4089(2) | 3718.7(12) | 24.4(3)  |
| C2   | 5928.3(6) | 4141(2) | 2573.2(12) | 27.6(4)  |
| C3   | 5743.9(6) | 3607(3) | 4298.0(13) | 31.6(4)  |
| C4   | 7440.8(6) | 5073(2) | 4325.1(11) | 20.6(3)  |
| C5   | 7843.4(6) | 5485(2) | 3870.2(11) | 21.6(3)  |

**Table S37:** Anisotropic Displacement Parameters ( $\times 10^4$ ) for **11**. The anisotropic displacement factor exponent takes the form:  $-2\pi^2[h^2a^{*2} \times U_{11} + \dots + 2hka^* \times b^* \times U_{12}]$

| Atom | $U_{11}$ | $U_{22}$ | $U_{33}$  | $U_{23}$  | $U_{13}$ | $U_{12}$ |
|------|----------|----------|-----------|-----------|----------|----------|
| O1   | 22.9(5)  | 48.5(7)  | 16.6(5)   | -1.1(5)   | 5.4(4)   | -2.5(5)  |
| O2   | 25.4(6)  | 46.0(7)  | 22.2(6)   | -3.9(5)   | 12.5(5)  | -1.2(5)  |
| O3   | 33.0(6)  | 44.9(7)  | 18.6(6)   | 3.2(5)    | -0.1(5)  | -2.4(5)  |
| O4   | 34.8(6)  | 52.7(7)  | 26.8(6)   | 0.1(6)    | 9.7(5)   | -15.9(6) |
| N1   | 24.0(6)  | 30.2(7)  | 16.7(7)   | 0.3(5)    | 9.6(5)   | 0.3(5)   |
| N2   | 28.5(7)  | 25.2(6)  | 23.9(7)   | 1.9(5)    | 14.4(6)  | 0.9(5)   |
| N3   | 30.0(7)  | 27.3(7)  | 17.2(7)   | 0.8(5)    | 8.4(6)   | -0.8(6)  |
| N4   | 33.6(7)  | 37.9(8)  | 27.3(7)   | 5.6(6)    | 12.3(6)  | 1.8(6)   |
| N5   | 33.7(8)  | 34.8(8)  | 29.4(8)   | 5.7(6)    | 5.8(6)   | -2.0(6)  |
| N6   | 55.4(11) | 35.3(9)  | 64.1(12)  | 5.3(8)    | 19.0(9)  | 4.7(8)   |
| N7   | 26.0(7)  | 54.5(9)  | 38.3(9)   | -10.6(7)  | 11.9(6)  | 1.2(7)   |
| N8   | 23.7(7)  | 46.0(9)  | 50.1(10)  | -1.2(8)   | 14.9(7)  | 2.6(6)   |
| N9   | 48.2(11) | 51.2(11) | 110.7(19) | -19.6(12) | 24.1(11) | 8.7(9)   |
| N10  | 24.3(6)  | 25.2(6)  | 18.3(6)   | -0.7(5)   | 8.3(5)   | -0.4(5)  |
| N11  | 25.8(7)  | 33.0(7)  | 19.6(6)   | -1.1(5)   | 6.4(5)   | -0.4(5)  |
| C1   | 26.9(8)  | 21.7(7)  | 27.4(8)   | 0.2(6)    | 12.5(6)  | 1.4(6)   |
| C2   | 27.5(8)  | 29.4(8)  | 27.3(8)   | -0.8(7)   | 10.2(7)  | -0.8(6)  |
| C3   | 29.9(8)  | 35.4(8)  | 34.1(9)   | 0.8(7)    | 16.6(7)  | -2.9(7)  |
| C4   | 27.0(8)  | 17.5(6)  | 18.1(7)   | -1.0(5)   | 8.1(6)   | 1.3(5)   |
| C5   | 24.4(7)  | 24.9(7)  | 15.6(7)   | -0.8(6)   | 6.1(6)   | 0.8(6)   |

**Table S38:** Bond Lengths in Å for **11**.

| Atom | Atom | Length/Å   |
|------|------|------------|
| O1   | N10  | 1.2550(17) |
| O2   | N10  | 1.2326(17) |
| O3   | N11  | 1.2427(18) |
| O4   | N11  | 1.2275(18) |
| N1   | N2   | 1.3843(18) |
| N1   | C4   | 1.344(2)   |
| N2   | C1   | 1.277(2)   |
| N3   | C4   | 1.318(2)   |
| N4   | N5   | 1.241(2)   |
| N4   | C2   | 1.487(2)   |
| N5   | N6   | 1.126(2)   |
| N7   | N8   | 1.234(2)   |

| Atom | Atom | Length/Å   |
|------|------|------------|
| N7   | C3   | 1.486(2)   |
| N8   | N9   | 1.119(3)   |
| N10  | C5   | 1.3984(19) |
| N11  | C5   | 1.430(2)   |
| C1   | C2   | 1.511(2)   |
| C1   | C3   | 1.510(2)   |
| C4   | C5   | 1.433(2)   |

**Table S39:** Bond Angles in ° for **11**.

| Atom | Atom | Atom | Angle°     |
|------|------|------|------------|
| C4   | N1   | N2   | 116.42(13) |
| C1   | N2   | N1   | 117.00(13) |
| N5   | N4   | C2   | 113.82(13) |
| N6   | N5   | N4   | 173.00(18) |
| N8   | N7   | C3   | 114.99(15) |
| N9   | N8   | N7   | 172.1(2)   |
| O1   | N10  | C5   | 118.09(12) |
| O2   | N10  | O1   | 121.09(12) |
| O2   | N10  | C5   | 120.78(13) |
| O3   | N11  | C5   | 118.50(13) |
| O4   | N11  | O3   | 122.23(14) |
| O4   | N11  | C5   | 119.12(13) |
| N2   | C1   | C2   | 126.13(14) |
| N2   | C1   | C3   | 115.68(15) |
| C3   | C1   | C2   | 118.18(14) |
| N4   | C2   | C1   | 113.13(13) |
| N7   | C3   | C1   | 110.35(14) |
| N1   | C4   | C5   | 120.82(14) |
| N3   | C4   | N1   | 117.64(14) |
| N3   | C4   | C5   | 121.54(15) |
| N10  | C5   | N11  | 115.95(13) |
| N10  | C5   | C4   | 123.26(14) |
| N11  | C5   | C4   | 120.53(13) |

**Table S40:** Torsion Angles in ° for **11**.

| Atom | Atom | Atom | Atom | Angle°      |
|------|------|------|------|-------------|
| O1   | N10  | C5   | N11  | -160.17(13) |
| O1   | N10  | C5   | C4   | 14.0(2)     |
| O2   | N10  | C5   | N11  | 22.23(19)   |
| O2   | N10  | C5   | C4   | -163.61(14) |
| O3   | N11  | C5   | N10  | -155.64(13) |
| O3   | N11  | C5   | C4   | 30.0(2)     |
| O4   | N11  | C5   | N10  | 28.6(2)     |
| O4   | N11  | C5   | C4   | -145.76(15) |
| N1   | N2   | C1   | C2   | 0.3(2)      |

| Atom | Atom | Atom | Atom | Angle/°     |
|------|------|------|------|-------------|
| N1   | N2   | C1   | C3   | 178.81(13)  |
| N1   | C4   | C5   | N10  | -7.3(2)     |
| N1   | C4   | C5   | N11  | 166.63(13)  |
| N2   | N1   | C4   | N3   | -0.8(2)     |
| N2   | N1   | C4   | C5   | 179.48(12)  |
| N2   | C1   | C2   | N4   | -55.3(2)    |
| N2   | C1   | C3   | N7   | 127.85(15)  |
| N3   | C4   | C5   | N10  | 173.06(13)  |
| N3   | C4   | C5   | N11  | -13.0(2)    |
| N5   | N4   | C2   | C1   | -68.86(18)  |
| N8   | N7   | C3   | C1   | -88.02(19)  |
| C2   | C1   | C3   | N7   | -53.50(19)  |
| C3   | C1   | C2   | N4   | 126.19(15)  |
| C4   | N1   | N2   | C1   | -179.77(13) |

**Table S41:** Hydrogen Fractional Atomic Coordinates ( $\times 10^4$ ) and Equivalent Isotropic Displacement Parameters ( $\text{\AA}^2 \times 10^3$ ) for **11**.  $U_{eq}$  is defined as 1/3 of the trace of the orthogonalised  $U_{ij}$ .

| Atom | x       | y        | z        | $U_{eq}$ |
|------|---------|----------|----------|----------|
| H1   | 6868(9) | 5000(30) | 3103(18) | 39(6)    |
| H3A  | 7287(8) | 4780(30) | 5538(15) | 26(5)    |
| H3B  | 7838(9) | 5020(30) | 5706(17) | 31(5)    |
| H2A  | 6080.18 | 2948.34  | 2298.62  | 33       |
| H2B  | 5548.63 | 3953.06  | 2358.4   | 33       |
| H3C  | 5624.38 | 2134.72  | 4168.95  | 38       |
| H3D  | 5915.16 | 3767.05  | 5035.05  | 38       |

**Table S42:** Hydrogen Bond information for **11**.

| D  | H   | A               | d(D-H)/\AA | d(H-A)/\AA | d(D-A)/\AA | D-H-A/deg |
|----|-----|-----------------|------------|------------|------------|-----------|
| N1 | H1  | O1              | 0.86(2)    | 1.94(2)    | 2.5688(17) | 129(2)    |
| N1 | H1  | N4              | 0.86(2)    | 2.33(2)    | 2.899(2)   | 123.9(18) |
| N3 | H3A | O1 <sup>1</sup> | 0.83(2)    | 2.33(2)    | 2.8926(17) | 125.9(17) |
| N3 | H3B | O2 <sup>1</sup> | 0.84(2)    | 2.35(2)    | 2.9590(19) | 129.9(18) |
| N3 | H3B | O3              | 0.84(2)    | 2.00(2)    | 2.610(2)   | 128.9(19) |

<sup>1</sup>+x,1-y,1/2+z

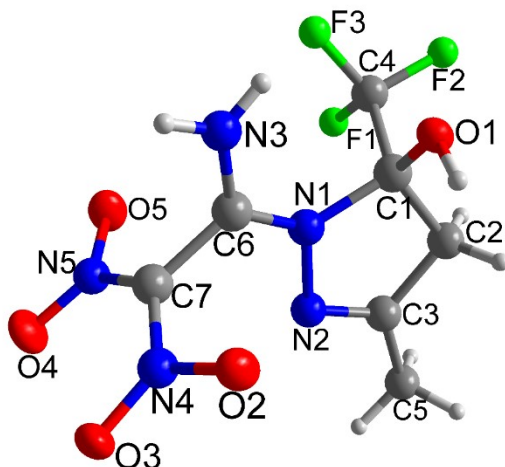

**Figure S15:** Thermal ellipsoids shown at 50% **12a**

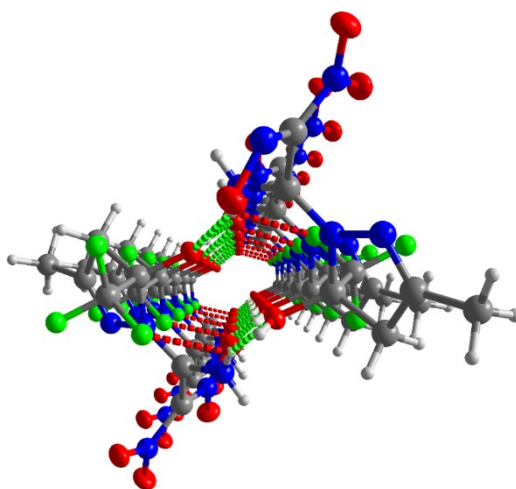

**Figure S16:** Ball-and-stick packing diagram of **12a** viewed up the a axis. Dashed lines indicate strong hydrogen bonding.

**Table S43:** Fractional Atomic Coordinates ( $\times 10^4$ ) and Equivalent Isotropic Displacement Parameters ( $\text{\AA}^2 \times 10^3$ ) for **12a**.  $U_{eq}$  is defined as 1/3 of the trace of the orthogonalised  $U_{ij}$ .

| Atom | x           | y          | z          | $U_{eq}$ |
|------|-------------|------------|------------|----------|
| F1   | 6668.0(17)  | 5814.0(17) | 4281.3(12) | 43.5(3)  |
| F2   | 7637.8(15)  | 7354.4(17) | 3173.2(16) | 47.4(4)  |
| F3   | 6724.5(15)  | 4594.1(16) | 2109.6(12) | 38.0(3)  |
| O1   | 4252.2(17)  | 6325.4(16) | 1040.6(13) | 24.6(3)  |
| O2   | -977.9(18)  | 3122.3(17) | 46.9(15)   | 31.9(3)  |
| O3   | -2295.7(17) | 1172.0(17) | 704.5(16)  | 32.3(3)  |
| O4   | 176(2)      | 73.0(19)   | 2448.2(16) | 37.3(4)  |
| O5   | 3074.3(18)  | 1332.0(18) | 2947.6(15) | 34.1(3)  |
| N1   | 3014(2)     | 4753.8(18) | 2298.2(15) | 23.0(3)  |
| N2   | 2047(2)     | 5246(2)    | 3311.5(16) | 26.5(4)  |

| Atom | x       | y          | z          | $U_{eq}$ |
|------|---------|------------|------------|----------|
| N3   | 3070(2) | 2602(2)    | 211.1(17)  | 26.4(4)  |
| N4   | -877(2) | 2056.7(19) | 709.6(16)  | 24.9(3)  |
| N5   | 1368(2) | 1076.1(19) | 2302.3(16) | 26.3(4)  |
| C1   | 4412(2) | 6236(2)    | 2394.0(19) | 23.5(4)  |
| C2   | 4034(3) | 7746(2)    | 3525(2)    | 28.6(4)  |
| C3   | 2634(3) | 6884(2)    | 4002.6(19) | 27.8(4)  |
| C4   | 6387(3) | 5980(2)    | 2994(2)    | 29.5(4)  |
| C5   | 1936(3) | 7823(3)    | 5189(2)    | 38.5(5)  |
| C6   | 2415(2) | 3167(2)    | 1282.9(19) | 23.6(4)  |
| C7   | 894(2)  | 1978(2)    | 1370.4(19) | 23.6(4)  |

**Table S44:** Anisotropic Displacement Parameters ( $\times 10^4$ ) for **12a**. The anisotropic displacement factor exponent takes the form:  $-2\pi^2[h^2a^{*2} \times U_{11} + \dots + 2hka^* \times b^* \times U_{12}]$

| Atom | $U_{11}$ | $U_{22}$ | $U_{33}$ | $U_{23}$ | $U_{13}$ | $U_{12}$ |
|------|----------|----------|----------|----------|----------|----------|
| F1   | 45.7(7)  | 57.2(8)  | 24.3(6)  | 17.3(5)  | 0.2(5)   | 20.0(6)  |
| F2   | 21.4(6)  | 45.3(7)  | 61.0(9)  | 19.0(6)  | -3.2(5)  | -4.0(5)  |
| F3   | 29.9(6)  | 45.3(7)  | 30.6(6)  | 6.9(5)   | 2.7(5)   | 15.8(5)  |
| O1   | 20.6(6)  | 31.0(7)  | 23.1(7)  | 13.5(5)  | 4.6(5)   | 4.9(5)   |
| O2   | 27.6(7)  | 37.9(8)  | 34.3(8)  | 21.0(6)  | 6.8(6)   | 9.0(5)   |
| O3   | 21.5(6)  | 29.8(7)  | 42.6(8)  | 11.1(6)  | 10.3(6)  | 1.1(5)   |
| O4   | 39.8(8)  | 37.8(8)  | 37.7(8)  | 21.7(6)  | 12.3(6)  | 0.7(6)   |
| O5   | 30.2(7)  | 37.2(7)  | 29.2(7)  | 14.8(6)  | -1.3(6)  | 5.7(5)   |
| N1   | 23.2(7)  | 24.7(8)  | 19.9(7)  | 8.4(6)   | 5.9(6)   | 2.9(6)   |
| N2   | 26.0(7)  | 31.9(8)  | 19.3(8)  | 8.5(6)   | 6.0(6)   | 4.6(6)   |
| N3   | 25.3(8)  | 24.6(8)  | 24.7(8)  | 4.9(6)   | 8.5(7)   | -0.6(6)  |
| N4   | 24.3(7)  | 24.6(7)  | 22.3(8)  | 5.5(6)   | 6.4(6)   | 4.1(6)   |
| N5   | 30.5(8)  | 24.4(8)  | 20.7(8)  | 7.1(6)   | 6.1(7)   | 3.6(6)   |
| C1   | 22.4(8)  | 23.2(8)  | 20.7(9)  | 8.3(6)   | 2.0(7)   | 1.3(6)   |
| C2   | 30.8(9)  | 24.7(9)  | 24.2(9)  | 6.6(7)   | 3.1(8)   | 4.7(7)   |
| C3   | 27.2(9)  | 31.7(9)  | 19.5(9)  | 7.7(7)   | 1.6(7)   | 7.5(7)   |
| C4   | 26.7(9)  | 31.6(10) | 22.8(9)  | 9.0(7)   | -0.6(8)  | 3.7(7)   |
| C5   | 37.2(11) | 40.2(12) | 27.6(11) | 0.9(8)   | 8.8(9)   | 6.9(9)   |
| C6   | 22.9(8)  | 24.8(8)  | 21.5(9)  | 10.3(7)  | 3.1(7)   | 4.3(6)   |
| C7   | 23.8(8)  | 24.3(9)  | 21.5(9)  | 9.0(7)   | 5.5(7)   | 3.7(7)   |

**Table S45:** Bond Lengths in Å for **12a**.

| Atom | Atom | Length/Å |
|------|------|----------|
| F1   | C4   | 1.324(2) |
| F2   | C4   | 1.335(2) |
| F3   | C4   | 1.326(2) |
| O1   | C1   | 1.377(2) |
| O2   | N4   | 1.276(2) |
| O3   | N4   | 1.237(2) |
| O4   | N5   | 1.237(2) |
| O5   | N5   | 1.248(2) |

| Atom | Atom | Length/Å |
|------|------|----------|
| N1   | N2   | 1.415(2) |
| N1   | C1   | 1.498(2) |
| N1   | C6   | 1.329(2) |
| N2   | C3   | 1.283(2) |
| N3   | C6   | 1.301(2) |
| N4   | C7   | 1.359(2) |
| N5   | C7   | 1.391(2) |
| C1   | C2   | 1.533(2) |
| C1   | C4   | 1.537(2) |
| C2   | C3   | 1.493(3) |
| C3   | C5   | 1.487(3) |
| C6   | C7   | 1.480(2) |

**Table S46:** Bond Angles in ° for **12a**.

| Atom | Atom | Atom | Angle°     |
|------|------|------|------------|
| N2   | N1   | C1   | 112.89(13) |
| C6   | N1   | N2   | 117.84(14) |
| C6   | N1   | C1   | 128.51(14) |
| C3   | N2   | N1   | 107.04(14) |
| O2   | N4   | C7   | 113.97(14) |
| O3   | N4   | O2   | 121.37(15) |
| O3   | N4   | C7   | 124.65(15) |
| O4   | N5   | O5   | 123.11(15) |
| O4   | N5   | C7   | 121.88(15) |
| O5   | N5   | C7   | 114.99(14) |
| O1   | C1   | N1   | 112.32(13) |
| O1   | C1   | C2   | 117.65(15) |
| O1   | C1   | C4   | 105.88(14) |
| N1   | C1   | C2   | 100.82(13) |
| N1   | C1   | C4   | 109.30(14) |
| C2   | C1   | C4   | 110.76(15) |
| C3   | C2   | C1   | 103.61(14) |
| N2   | C3   | C2   | 115.31(16) |
| N2   | C3   | C5   | 121.14(18) |
| C5   | C3   | C2   | 123.55(17) |
| F1   | C4   | F2   | 108.25(15) |
| F1   | C4   | F3   | 107.42(15) |
| F1   | C4   | C1   | 110.90(15) |
| F2   | C4   | C1   | 109.42(15) |
| F3   | C4   | F2   | 107.64(16) |
| F3   | C4   | C1   | 113.05(15) |
| N1   | C6   | C7   | 117.82(15) |
| N3   | C6   | N1   | 124.09(16) |
| N3   | C6   | C7   | 118.09(16) |
| N4   | C7   | N5   | 124.43(15) |
| N4   | C7   | C6   | 116.73(15) |

| Atom | Atom | Atom | Angle/°    |
|------|------|------|------------|
| N5   | C7   | C6   | 118.01(15) |

**Table S47:** Torsion Angles in ° for **12a**.

| Atom | Atom | Atom | Atom | Angle/°    |
|------|------|------|------|------------|
| O1   | C1   | C2   | C3   | 127.80(15) |
| O1   | C1   | C4   | F1   | -77.75(14) |
| O1   | C1   | C4   | F2   | 62.91(18)  |
| O1   | C1   | C4   | F3   | -57.03(19) |
| O2   | N4   | C7   | N5   | 171.86(15) |
| O2   | N4   | C7   | C6   | 2.5(2)     |
| O3   | N4   | C7   | N5   | -9.4(3)    |
| O3   | N4   | C7   | C6   | -78.77(15) |
| O4   | N5   | C7   | N4   | 10.0(3)    |
| O4   | N5   | C7   | C6   | 179.20(15) |
| O5   | N5   | C7   | N4   | -71.35(16) |
| O5   | N5   | C7   | C6   | -2.2(2)    |
| N1   | N2   | C3   | C2   | 1.9(2)     |
| N1   | N2   | C3   | C5   | -78.26(17) |
| N1   | C1   | C2   | C3   | 5.34(17)   |
| N1   | C1   | C4   | F1   | -56.55(19) |
| N1   | C1   | C4   | F2   | -75.89(14) |
| N1   | C1   | C4   | F3   | 64.17(19)  |
| N1   | C6   | C7   | N4   | 86.3(2)    |
| N1   | C6   | C7   | N5   | -83.7(2)   |
| N2   | N1   | C1   | O1   | -30.98(15) |
| N2   | N1   | C1   | C2   | -4.88(18)  |
| N2   | N1   | C1   | C4   | 111.82(15) |
| N2   | N1   | C6   | N3   | 173.73(16) |
| N2   | N1   | C6   | C7   | -5.5(2)    |
| N3   | C6   | C7   | N4   | -93.0(2)   |
| N3   | C6   | C7   | N5   | 97.0(2)    |
| C1   | N1   | N2   | C3   | 2.15(19)   |
| C1   | N1   | C6   | N3   | 4.5(3)     |
| C1   | N1   | C6   | C7   | -74.75(15) |
| C1   | C2   | C3   | N2   | -4.9(2)    |
| C1   | C2   | C3   | C5   | 175.23(18) |
| C2   | C1   | C4   | F1   | 53.7(2)    |
| C2   | C1   | C4   | F2   | -65.7(2)   |
| C2   | C1   | C4   | F3   | 174.38(15) |
| C4   | C1   | C2   | C3   | -10.28(16) |
| C6   | N1   | N2   | C3   | -68.71(15) |
| C6   | N1   | C1   | O1   | 38.7(2)    |
| C6   | N1   | C1   | C2   | 164.78(16) |
| C6   | N1   | C1   | C4   | -78.5(2)   |

**Table S48:** Hydrogen Fractional Atomic Coordinates ( $\times 10^4$ ) and Equivalent Isotropic Displacement Parameters ( $\text{\AA}^2 \times 10^3$ ) for **12a**.  $U_{eq}$  is defined as 1/3 of the trace of the orthogonalised  $U_{ij}$ .

| Atom | x        | y        | z        | $U_{eq}$ |
|------|----------|----------|----------|----------|
| H2A  | 3510(30) | 8520(30) | 3080(20) | 28(5)    |
| H2B  | 5180(40) | 8410(30) | 4380(30) | 43(6)    |
| H5A  | 910(30)  | 7090(30) | 5320(30) | 35(6)    |
| H5B  | 2990(40) | 8350(40) | 6080(30) | 53(7)    |
| H5C  | 1440(40) | 8800(40) | 4980(30) | 45(7)    |
| H3A  | 3880(40) | 3120(30) | 30(30)   | 32(6)    |
| H3B  | 2640(40) | 1580(40) | -320(30) | 37(6)    |
| H1   | 3230(40) | 6550(30) | 670(30)  | 43(7)    |

**Table S49:** Hydrogen Bond information for **12a**.

| D  | H   | A               | d(D-H)/\AA | d(H-A)/\AA | d(D-A)/\AA | D-H-A/deg |
|----|-----|-----------------|------------|------------|------------|-----------|
| N3 | H3A | F3              | 0.81(3)    | 2.43(2)    | 2.8682(19) | 115(2)    |
| N3 | H3A | O1 <sup>1</sup> | 0.81(3)    | 2.11(3)    | 2.889(2)   | 161(2)    |
| N3 | H3A | O1              | 0.81(3)    | 2.50(2)    | 2.913(2)   | 113.2(19) |
| N3 | H3B | O3 <sup>2</sup> | 0.82(3)    | 2.18(3)    | 2.930(2)   | 152(2)    |
| O1 | H1  | O2 <sup>3</sup> | 0.85(3)    | 1.77(3)    | 2.6090(18) | 174(2)    |

<sup>1</sup>1-x,1-y,-z; <sup>2</sup>-x,-y,-z; <sup>3</sup>-x,1-y,-z

#### 4. NMR Spectra

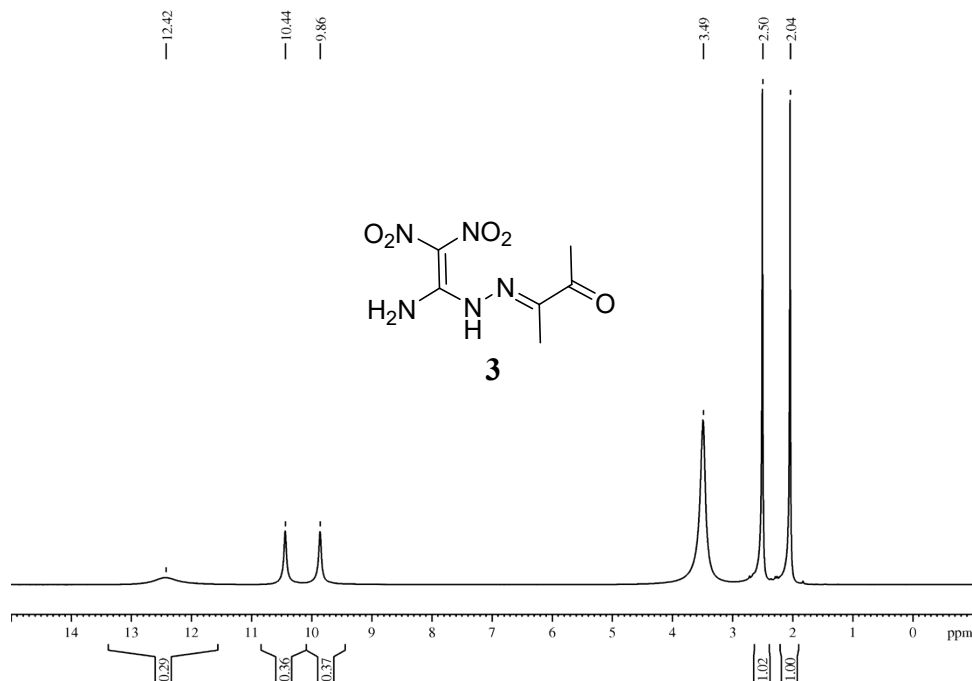

**Figure S17:** <sup>1</sup>H NMR-Compound **3**



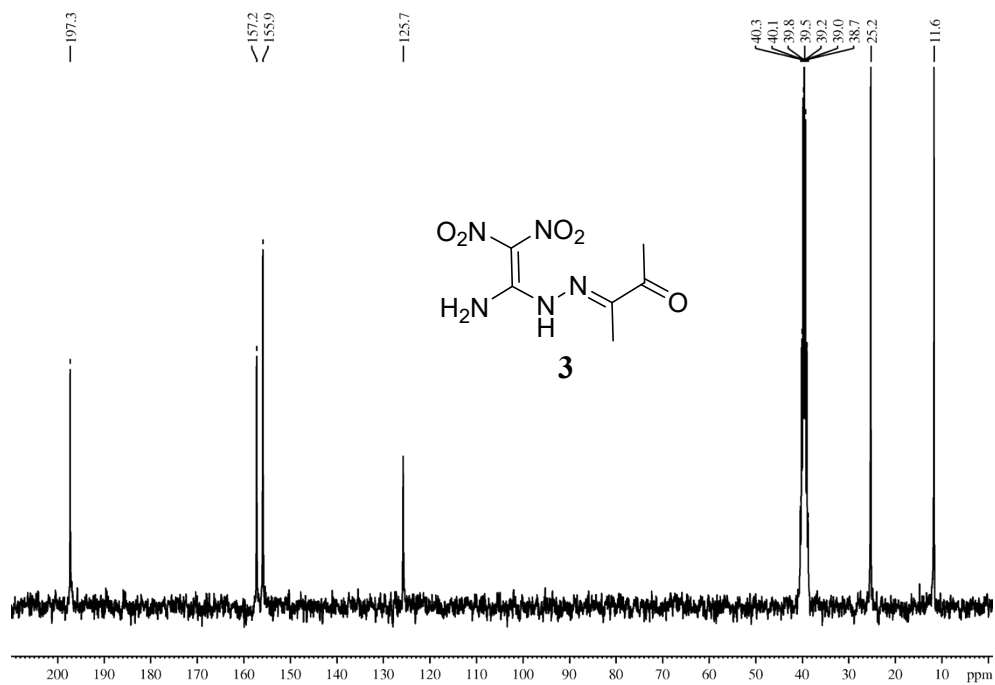

Figure S18: <sup>13</sup>C NMR-Compound 3

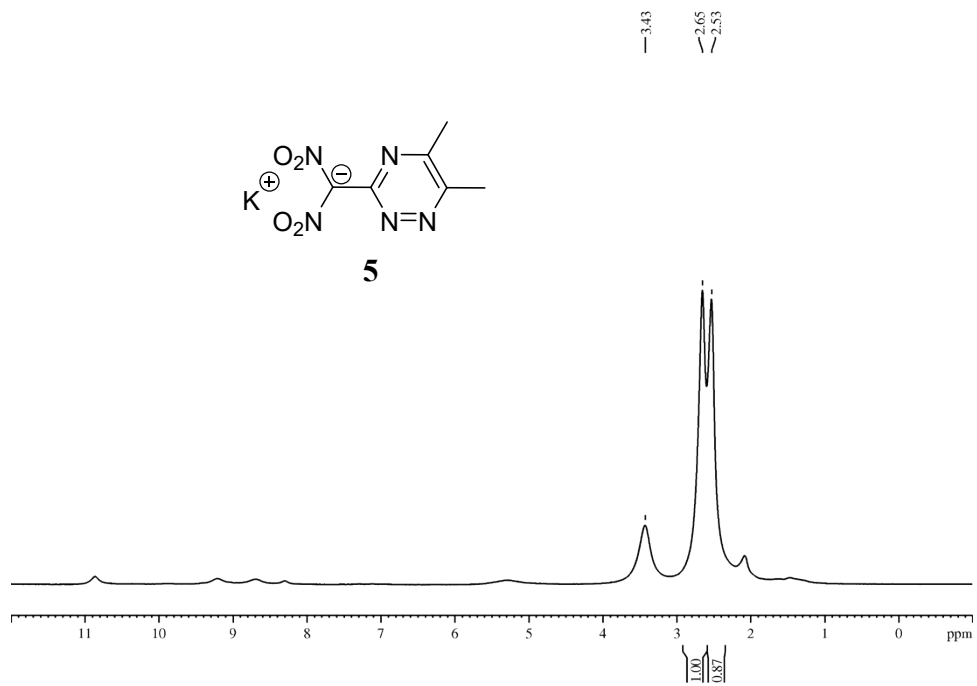

Figure S19: <sup>1</sup>H NMR-Compound 5

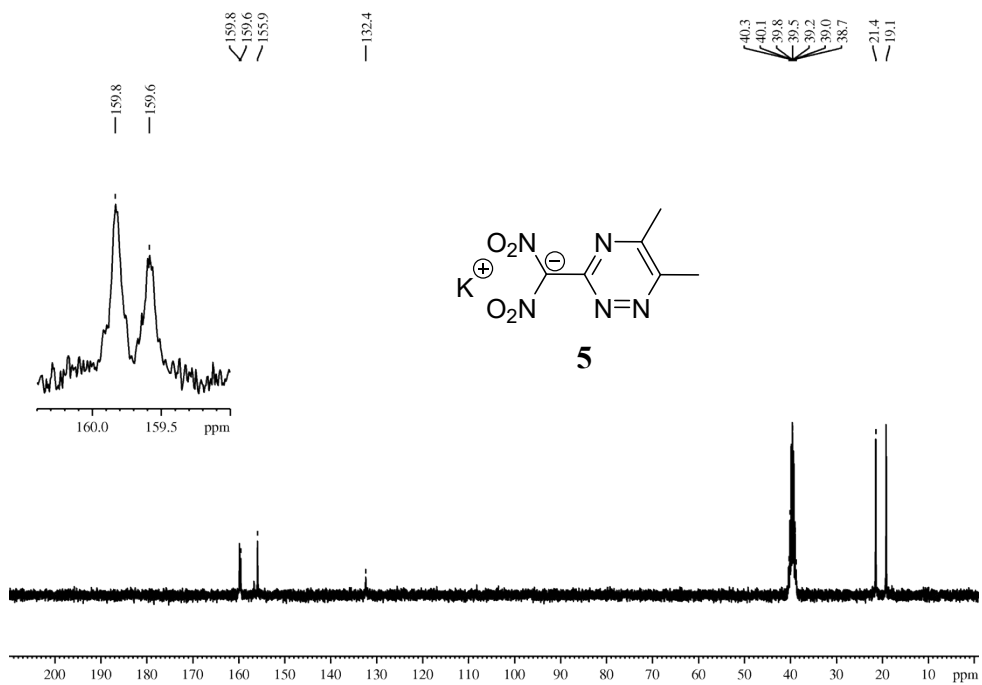

Figure S20:  $^{13}\text{C}$  NMR-Compound 5

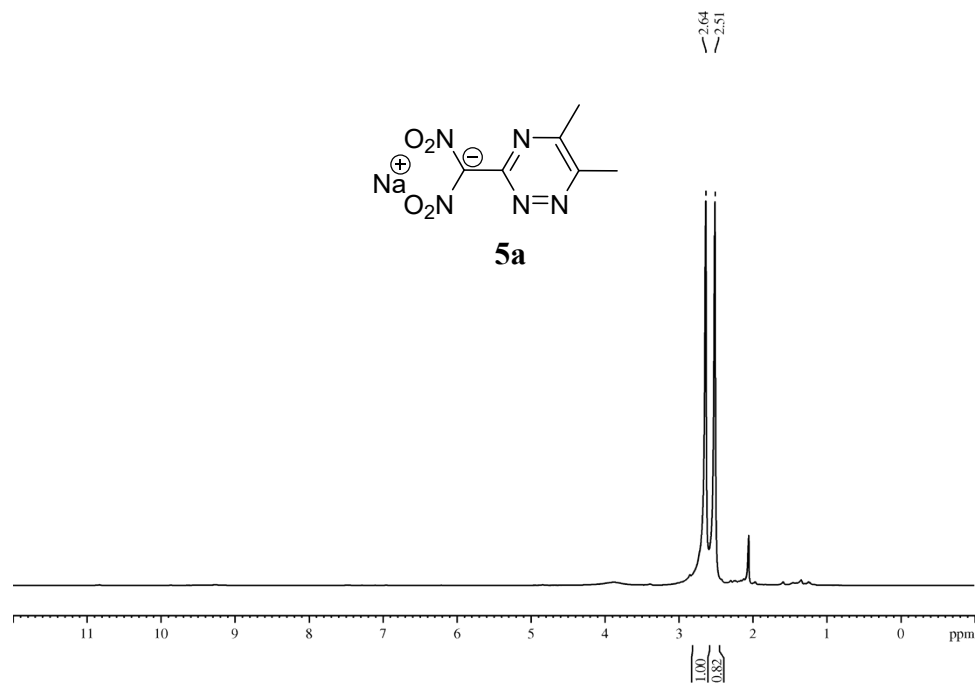

Figure S21:  $^1\text{H}$  NMR-Compound 5a

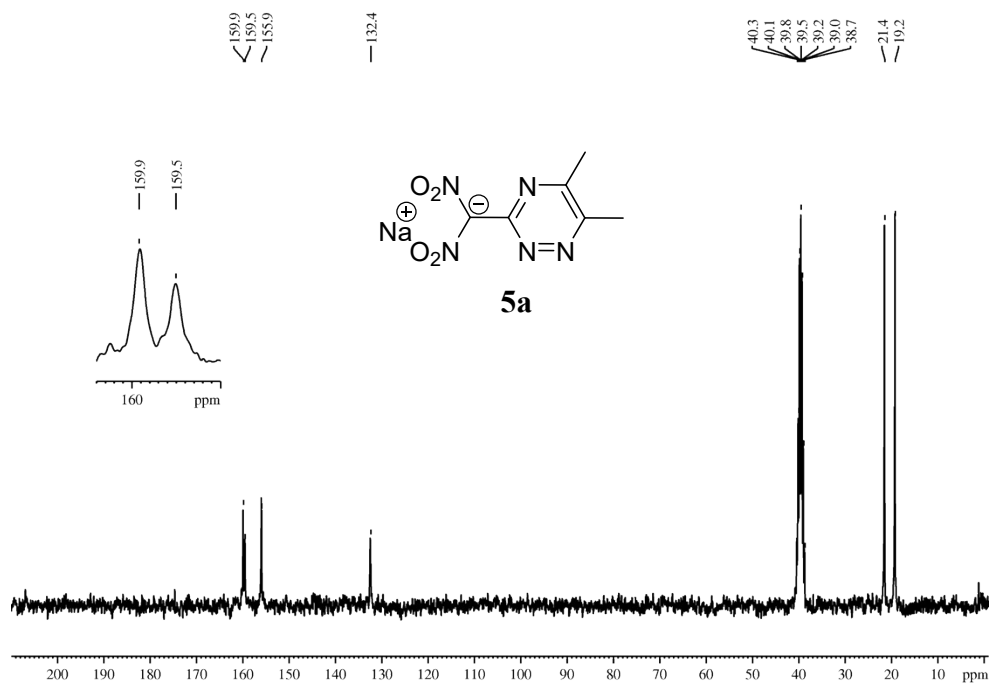

Figure S22:  $^{13}\text{C}$  NMR-Compound **5a**

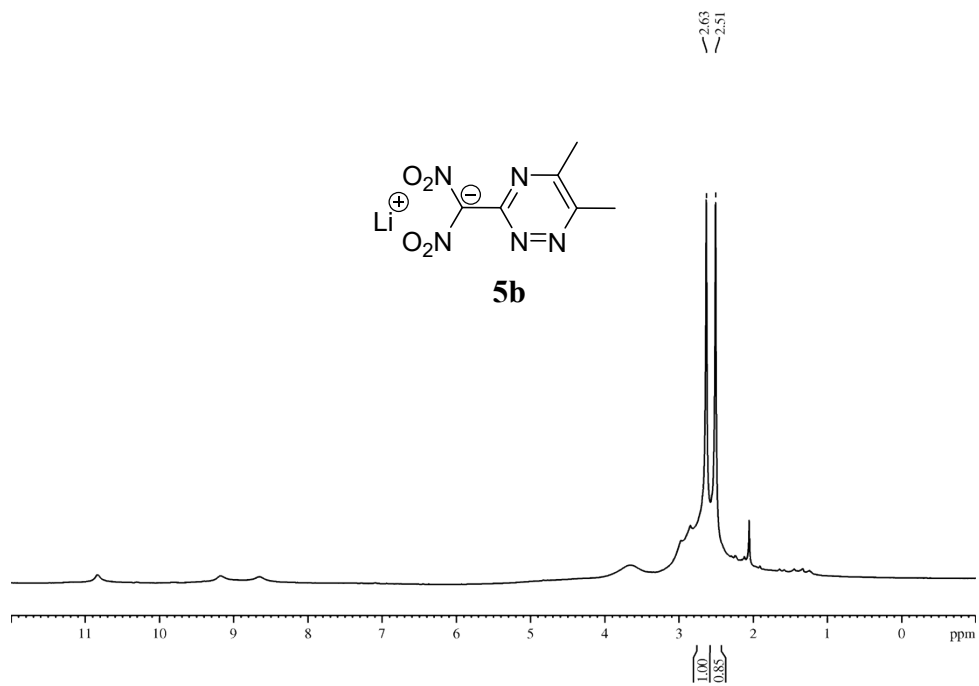

Figure S23:  $^1\text{H}$  NMR-Compound **5b**

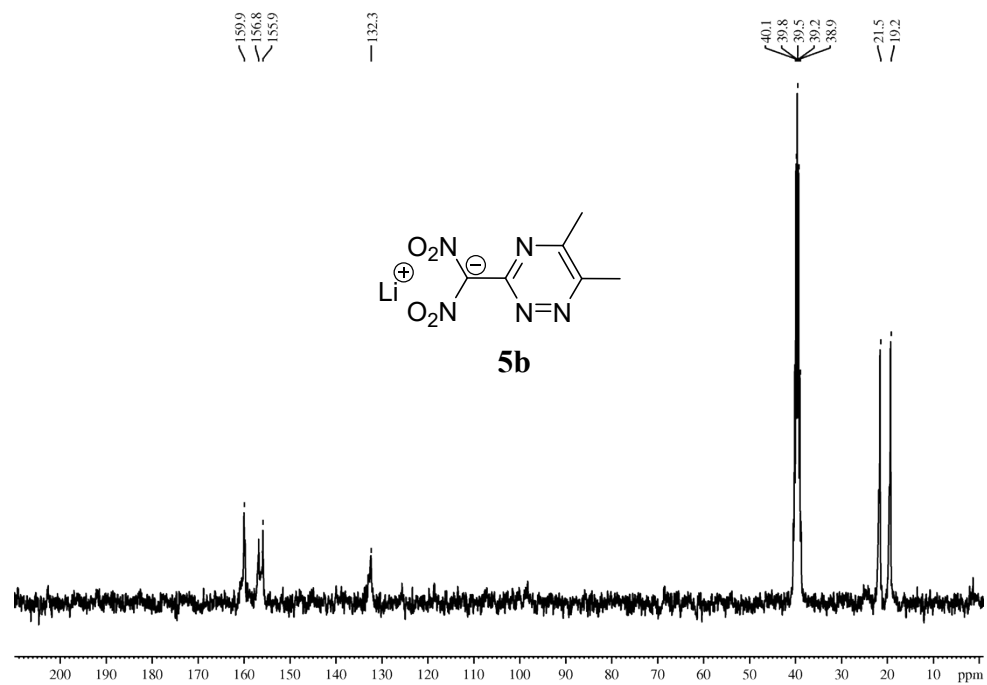

Figure S24:  $^{13}\text{C}$  NMR-Compound **5b**

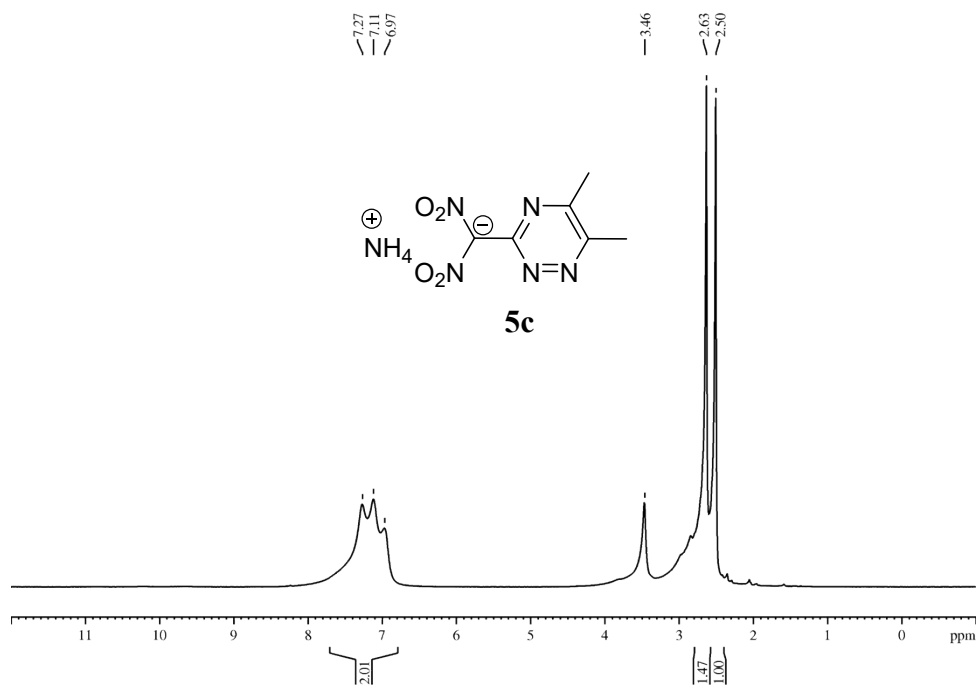

Figure S25:  $^1\text{H}$  NMR-Compound **5c**

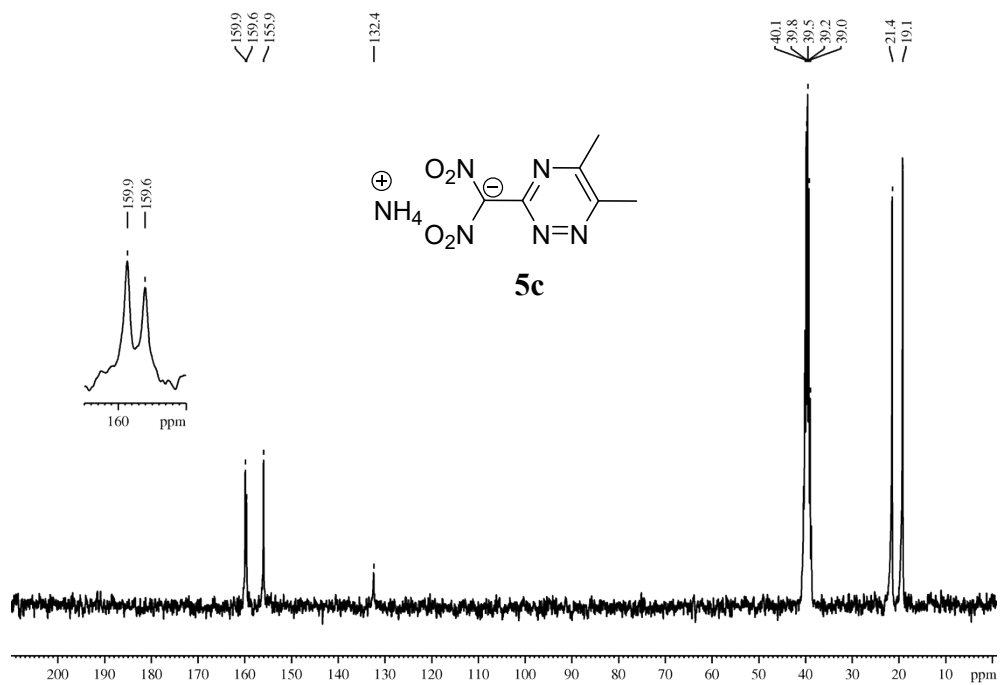

Figure S26:  $^{13}\text{C}$  NMR-Compound **5c**

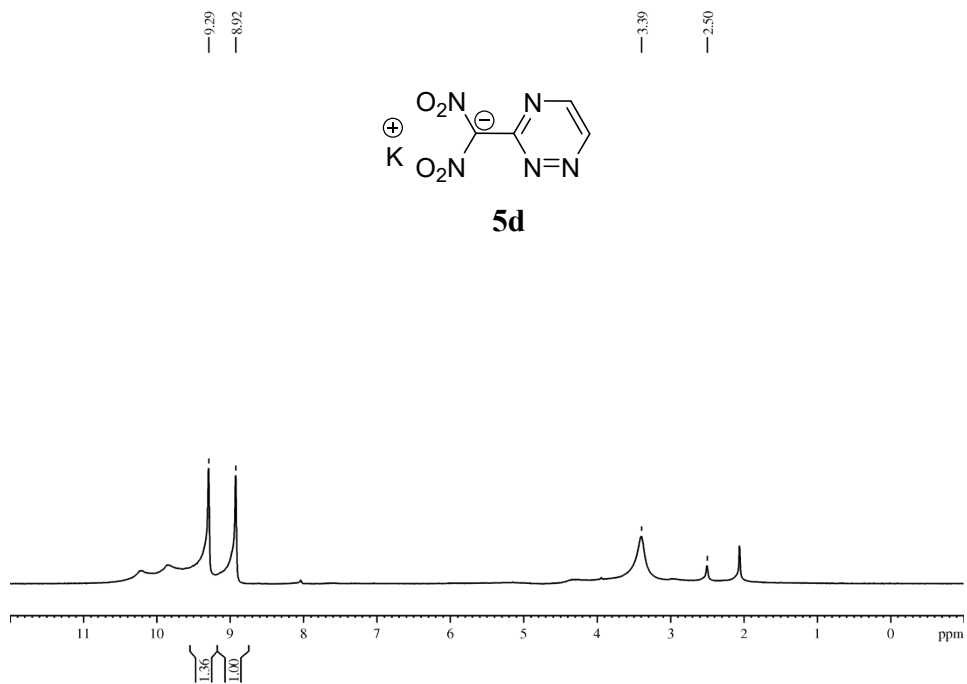

Figure S27:  $^1\text{H}$  NMR-Compound **5d**

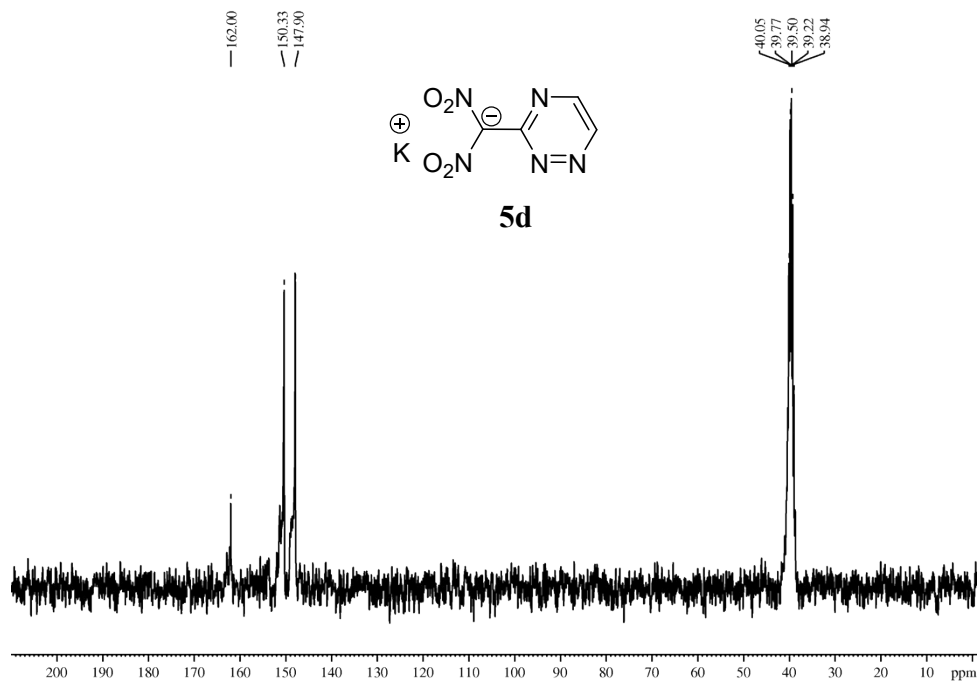

Figure S28:  $^{13}\text{C}$  NMR-Compound **5d**

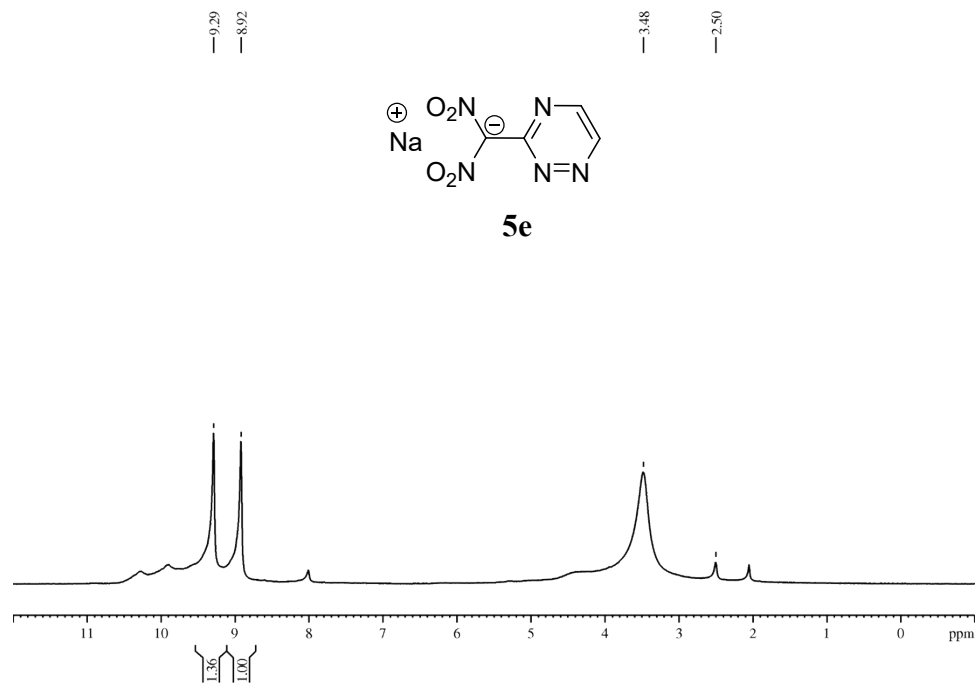

Figure S29:  $^1\text{H}$  NMR-Compound **5e**

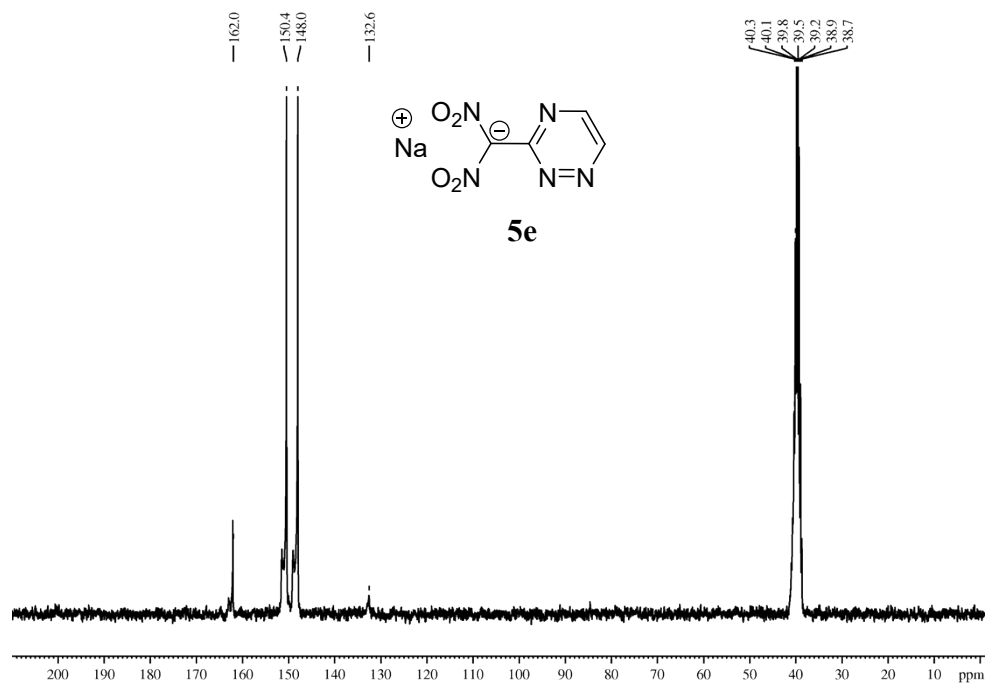

Figure S30: <sup>13</sup>C NMR-Compound **5e**

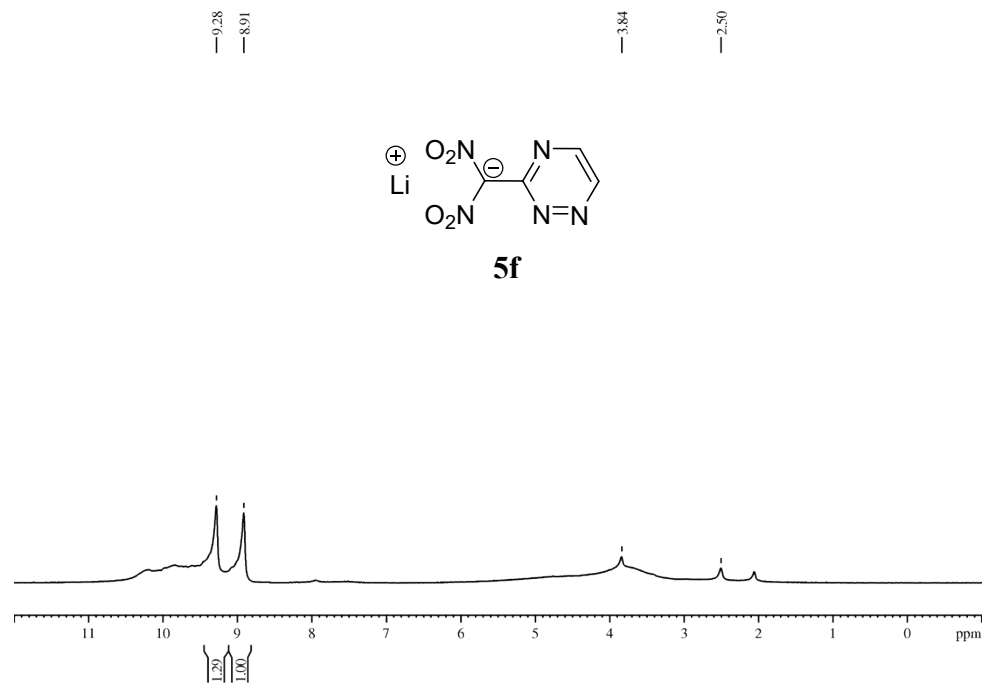

Figure S31: <sup>1</sup>H NMR-Compound **5f**

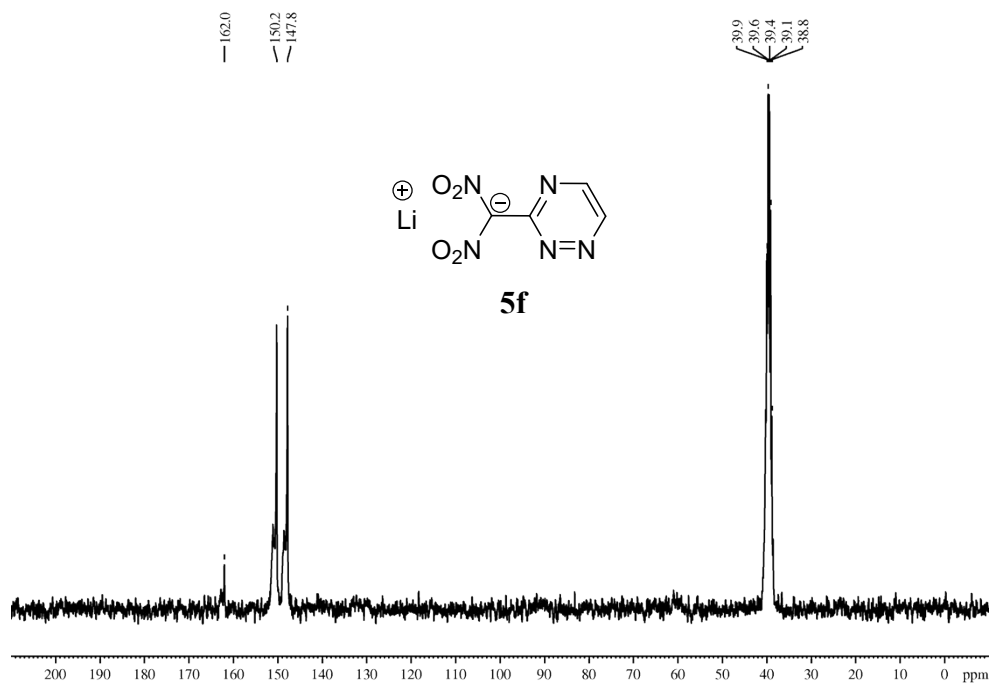

Figure S32:  $^{13}\text{C}$  NMR-Compound **5f**

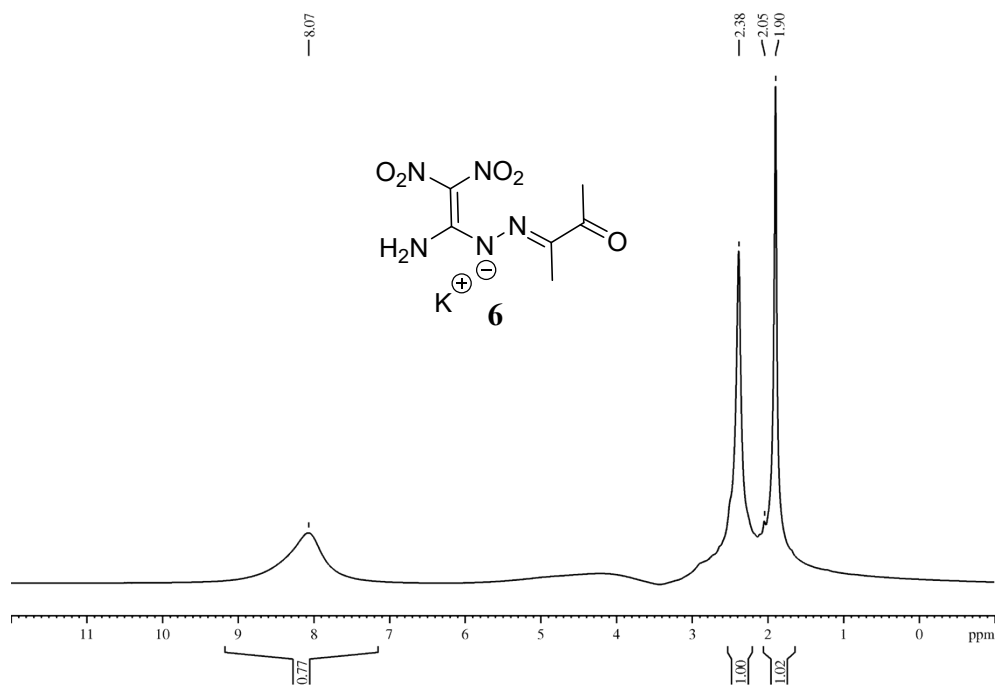

Figure S33:  $^1\text{H}$  NMR-Compound **6**



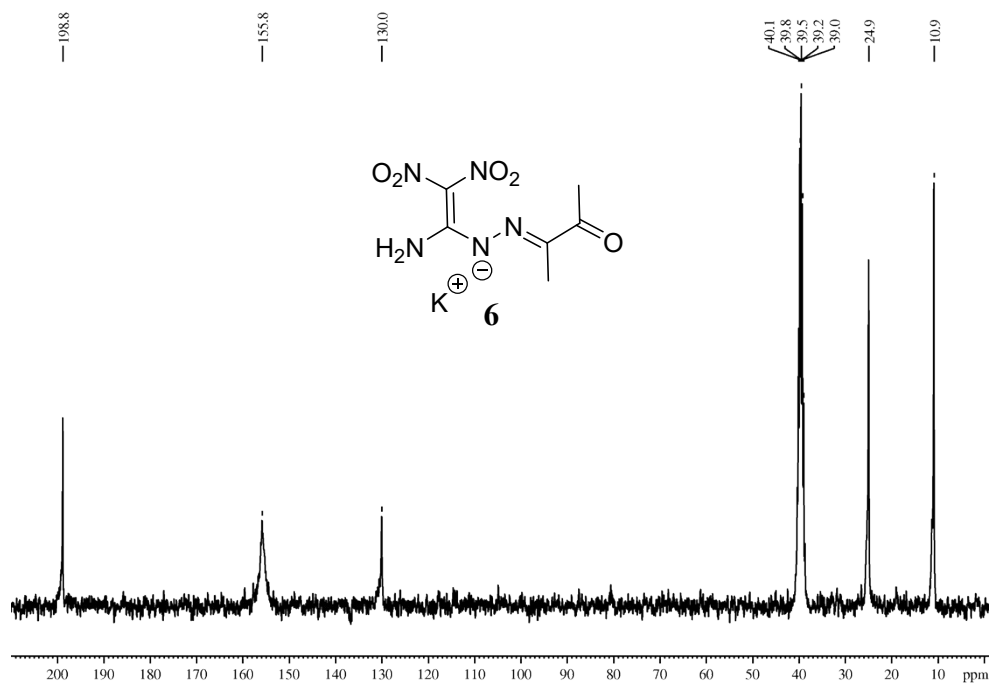

Figure S34: <sup>13</sup>C NMR-Compound 6

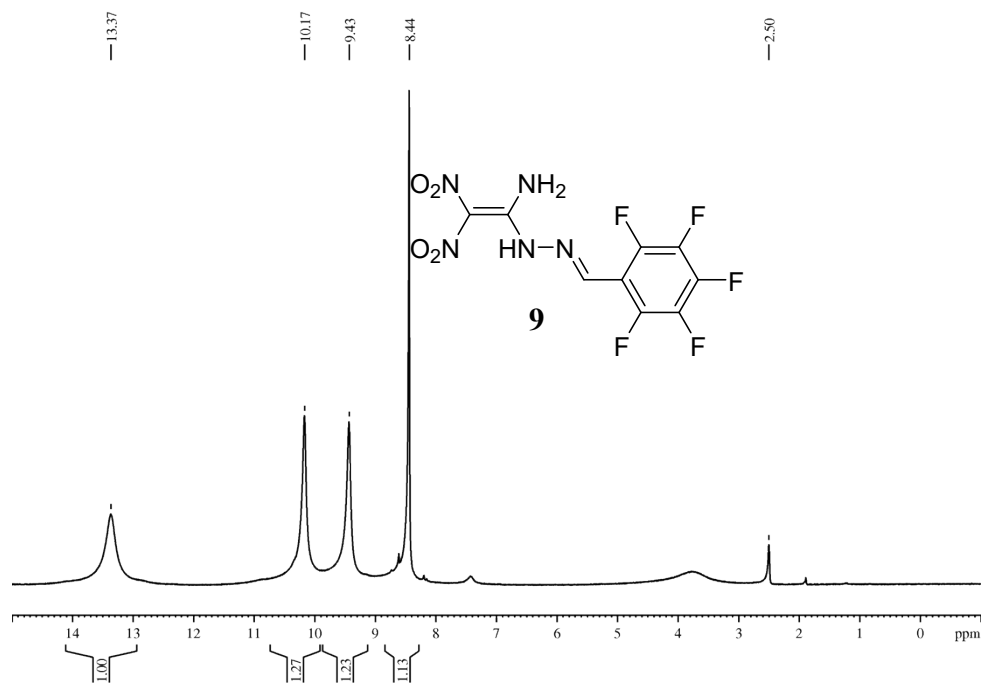

Figure S35: <sup>1</sup>H NMR-Compound 9

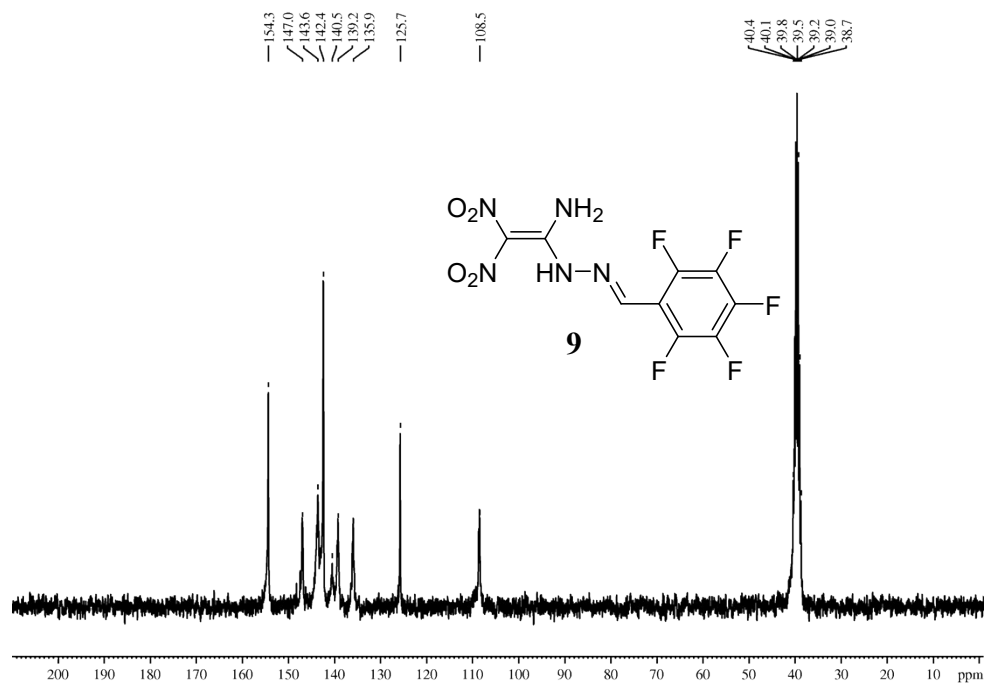

Figure S36: <sup>13</sup>C NMR-Compound 9

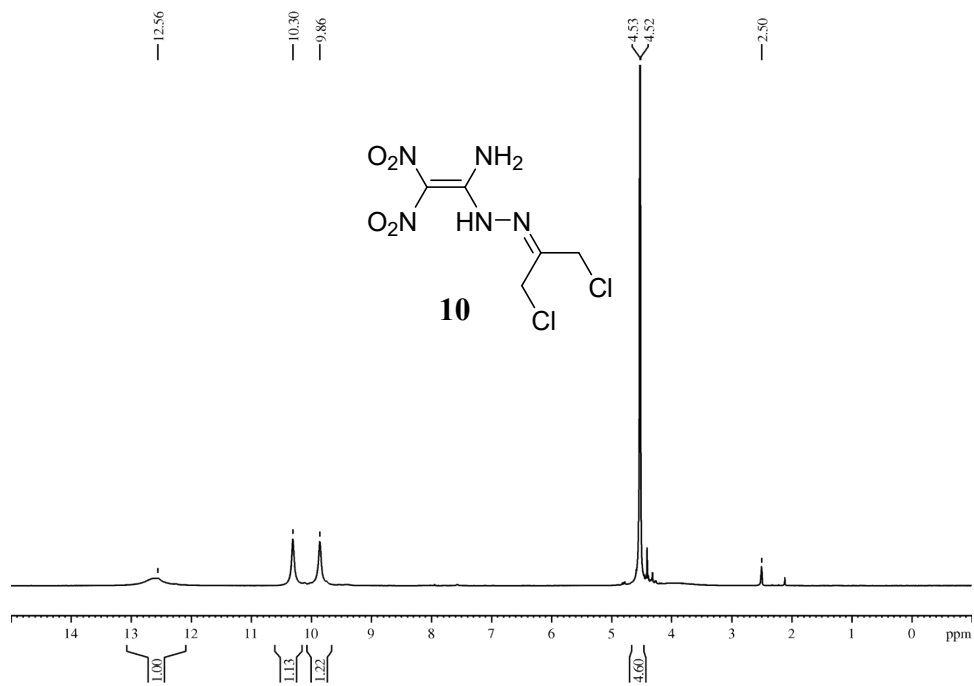

Figure S37: <sup>1</sup>H NMR-Compound 10

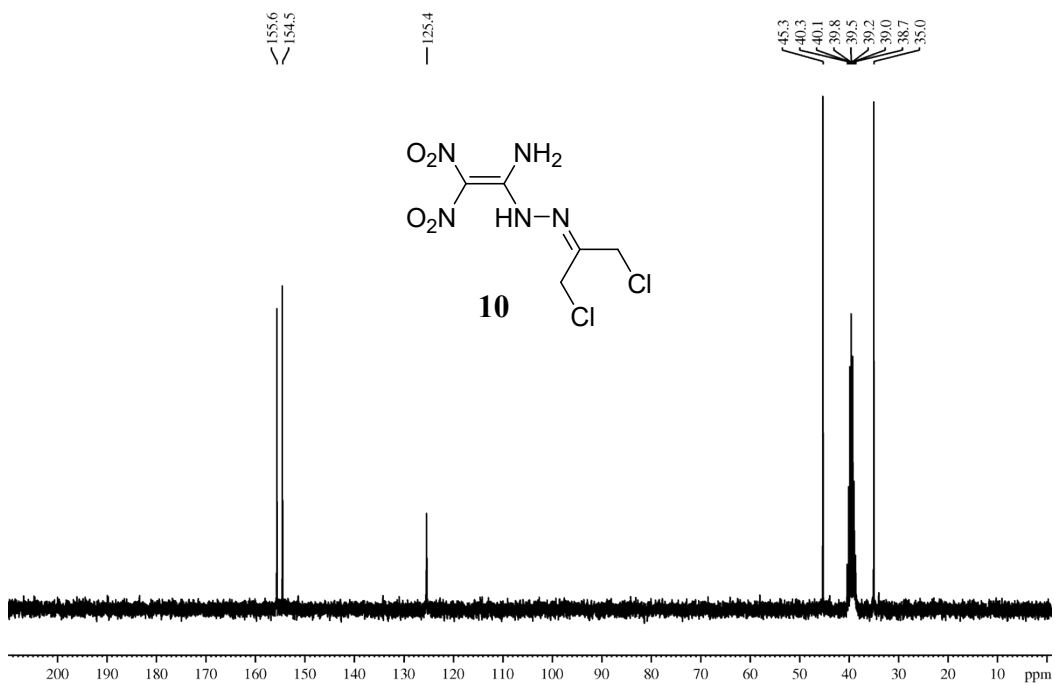

Figure S38:  $^{13}\text{C}$  NMR-Compound 10

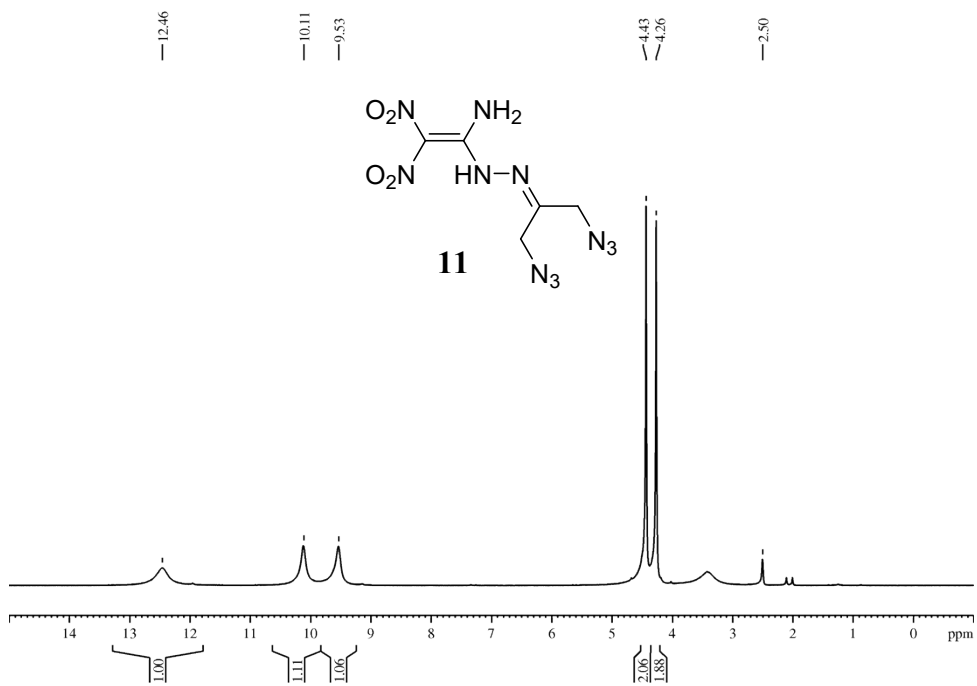

Figure S39:  $^1\text{H}$  NMR-Compound 11

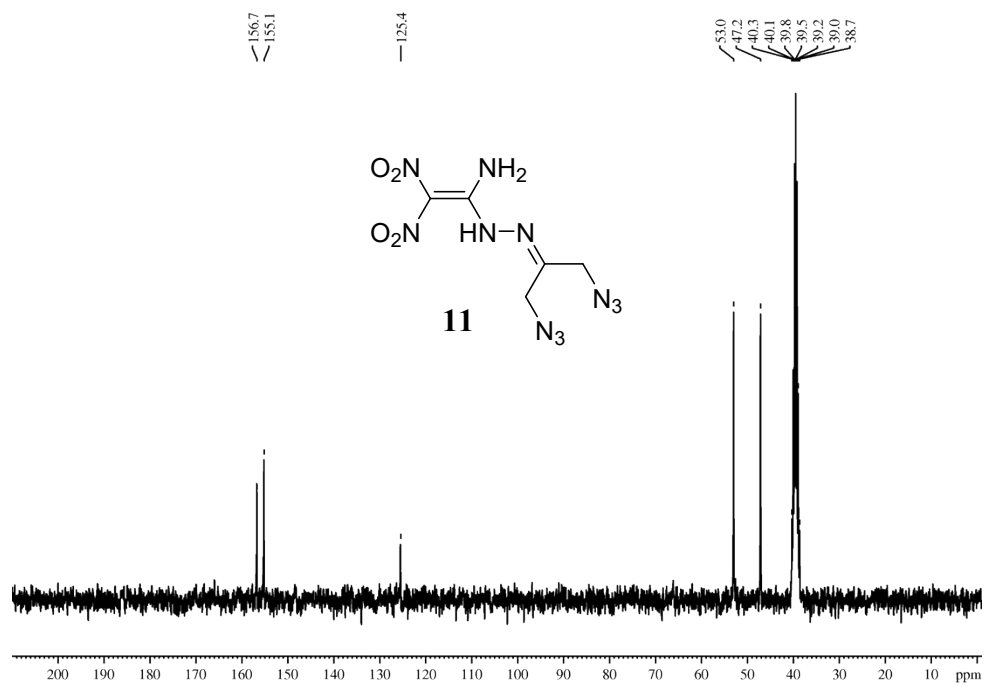

Figure S40: <sup>13</sup>C NMR-Compound **11**

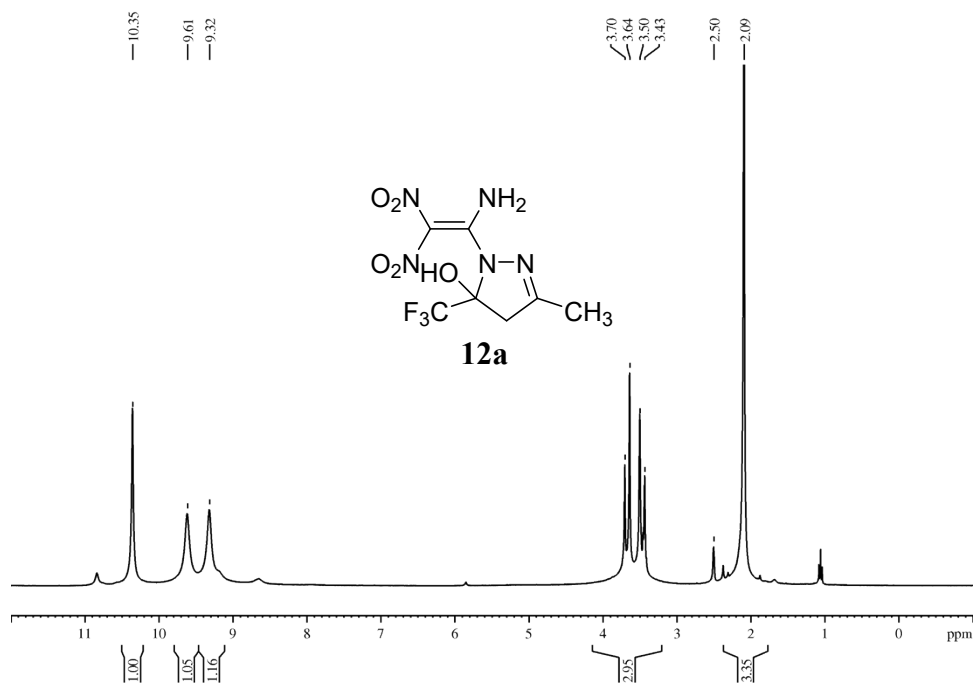

Figure S41: <sup>1</sup>H NMR-Compound **12a**

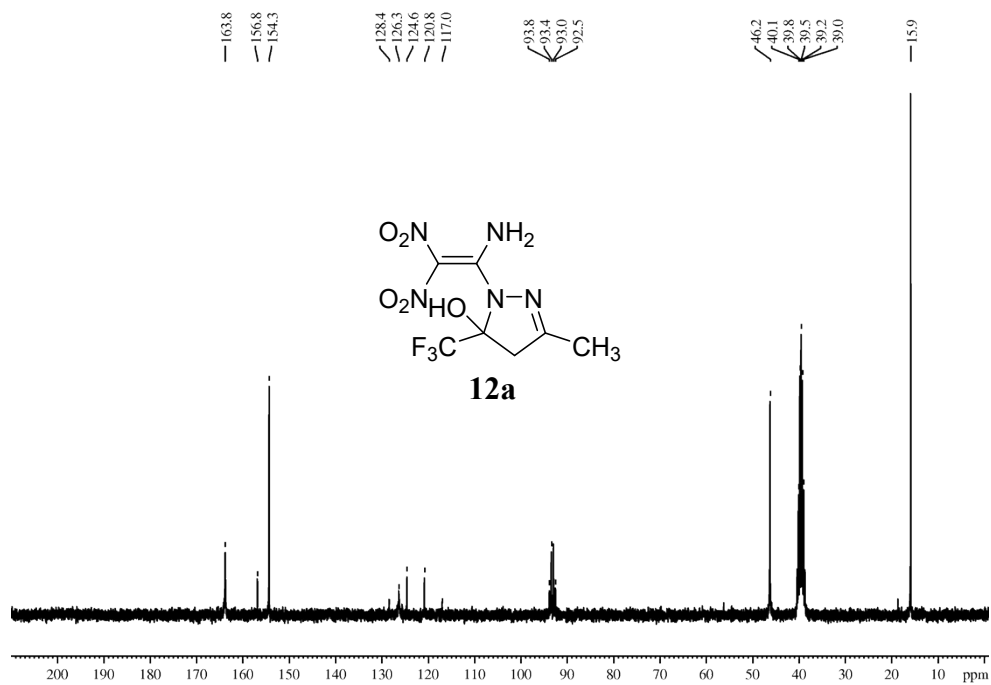

Figure S42:  $^{13}\text{C}$  NMR-Compound **12a**

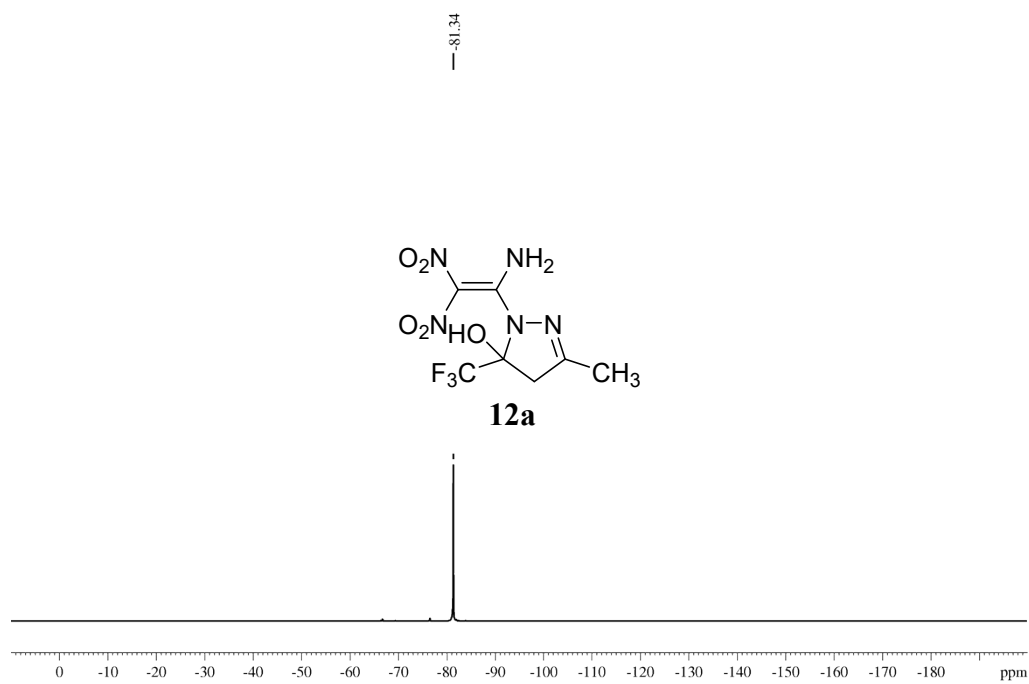

Figure S43:  $^{19}\text{F}$  NMR-Compound **12a**

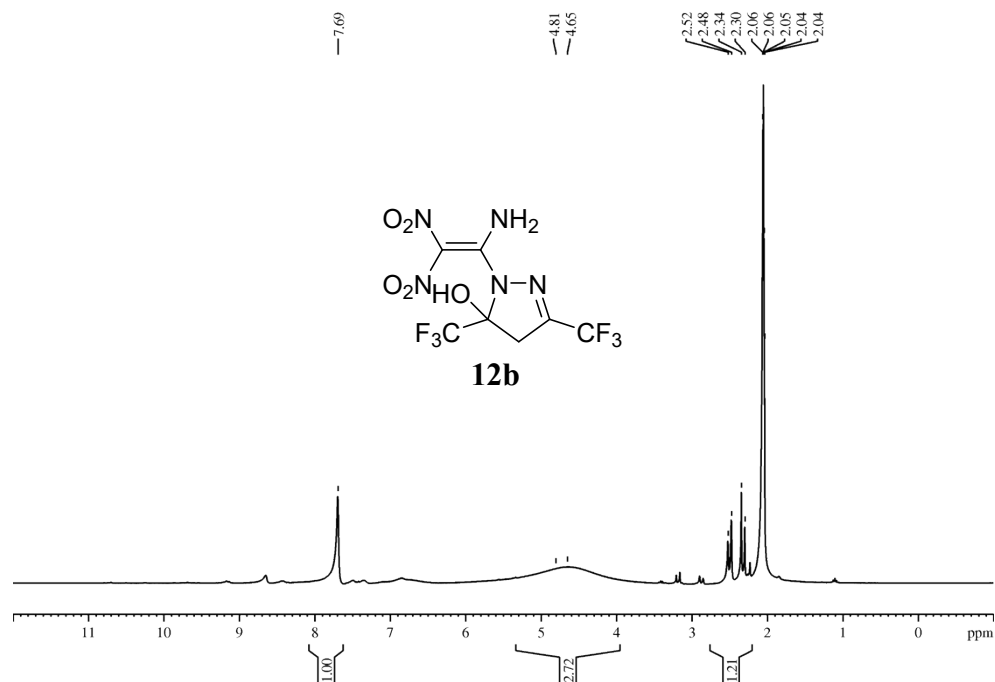

Figure S44: <sup>1</sup>H NMR-Compound **12b** in Acetone-d<sub>6</sub>

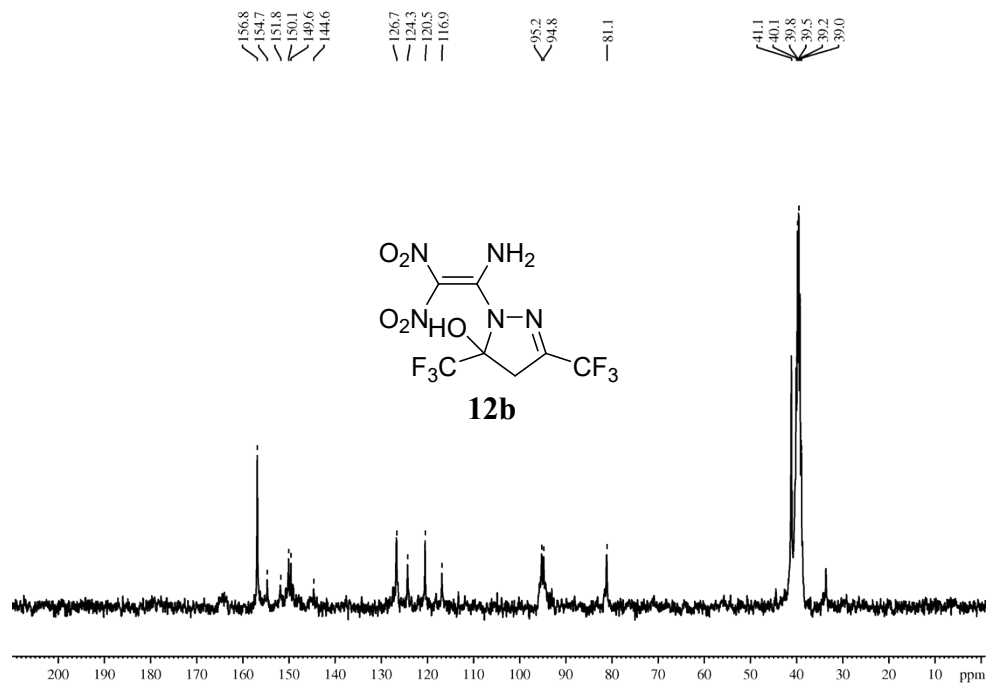

Figure S45: <sup>13</sup>C NMR-Compound **12b** in DMSO-d<sub>6</sub>

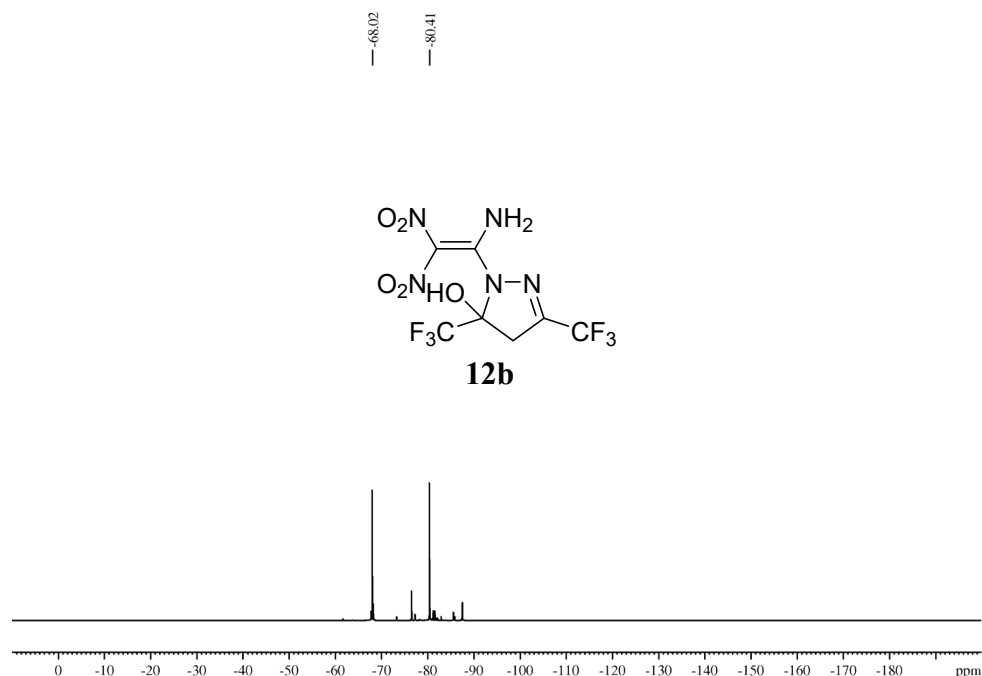

**Figure S46:**  $^{19}\text{F}$  NMR-Compound **12b** in  $\text{DMSO-d}_6$

## 5. References

- (1) Bellamy, A. J.; Contini, A. E.; Latypov, N. V. 1-Amino-1-hydrazo-2,2-dinitroethene - a hazard warning, *Propellants, Explos., Pyrotech.* **2008**, *33*, 87–88.
- (2) Frisch, M. J.; Trucks, G. W.; Schlegel, H. G.; Scuseria, G. E.; Robb, M. A.; Montgomery, J. A., Jr.; Vreven, T.; Kudin, K. N.; Burant, J. C.; Millam, J. M.; Iyengar, S. S.; Tomasi, J.; Barone, V.; Mennucci, B.; Cossi, M.; Scalmani, G.; Rega, N.; Petersson, G. A.; Nakatsuji, H.; Hada, M.; Ehara, M.; Toyota, K.; Fukuda, R.; Hasegawa, J.; Ishida, M.; Nakajima, T.; Honda, Y.; Kitao, O.; Nakai, H.; Klene, M.; Li, X.; Knox, J. E.; Hratchian, H. P.; Cross, J. B.; Bakken, V.; Adamo, C.; Jaramillo, J.; Gomperts, R.; Stratmann, R. E.; Yazyev, O.; Austin, A. J.; Cammi, R.; Pomelli, C.; Ochterski, J. W.; Ayala, P. Y.; Morokuma, K.; Voth, G. A.; Salvador, P.; Dannenberg, J. J.; Zakrzewski, V. G.; Dapprich, S.; Daniels, A. D.; Strain, M. C.; Farkas, O.; Malick, D. K.; Rabuck, A. D.; Raghavachari, K.; Foresman, J. B.; Ortiz, J. V.; Cui, Q.; Baboul, A. G.; Clifford, S.; Cioslowski, J.; Stefanov, B. B.; Liu, A. L. G.; Piskorz, P.; Komaromi, I.; Martin, R. L.; Fox, D. J.; Keith, T.; Al-Laham, M. A.; Peng, C.; Nanayakkara, A.; Challacombe, M.; Gill, P. M. W.; Johnson, B.; Chen, W.; Wong, M.; Gonzalez, C.; Pople, J. A. Gaussian 03, Revision D.01; Gaussian, Inc.: Wallingford, CT, **2004**.
- (3) Westwell, M. S.; Searle, M. S.; Wales, D. J.; Williams, D. H. Empirical correlations between thermodynamic properties and intermolecular forces. *J. Am. Chem. Soc.* **1995**, *117*, 5013–5015.

- (4) Gao, H.; Ye, C.; Piekarski, C. M.; Shreeve, J. M. Computational characterization of energetic salts. *J. Phys. Chem. C* **2007**, *111*, 10718–10731.
- (5) Dolomanov, O. V.; Bourhis, L. J.; Gildea, R. J.; Howard, J. A. K.; Puschmann, H. Olex2: A complete structure solution, refinement and analysis program, *J. Appl. Cryst.*, **2009**, *42*, 339-341.
- (6) Sheldrick, G.M., A short history of ShelX, *Acta Cryst.*, **2008**, *A64*, 112-122.
- (7) Twin reference: Parsons, S. Introduction to twinning *Acta Cryst.* **2003**, *D59*, 1995-2003.
- (8) CrysAlisPro (ROD), Rigaku Oxford Diffraction, Poland (?).
- (9) CrysAlisPro Software System, Rigaku Oxford Diffraction, (**2020**).
- (10) Sheldrick, G.M., Crystal structure refinement with ShelXL, *Acta Cryst.*, **2015**, *C71*, 3-8.
- (11) Sheldrick, G.M., ShelXT-Integrated space-group and crystal-structure determination, *Acta Cryst.*, **2015**, *A71*, 3-8.
